# Supplementary material for: Identification of DNA-Binding Proteins Using Support Vector Machine with Sequence Information
Source: Hindawi journal article supplement (doi:10.1155/2013/524502), 2013-01-01
Supplement: f1 [file 524502.f1.pdf]

---

**Training dataset (TrD\_10642)**

---

---

**5321 DNA-binding proteins**

---

|        |        |        |        |        |        |        |        |
|--------|--------|--------|--------|--------|--------|--------|--------|
| P16375 | P16376 | Q8V2N7 | O41107 | Q01980 | P67664 | P43463 | Q9R9M8 |
| P29552 | O76762 | P15856 | Q05007 | P29555 | Q26430 | P29556 | Q07961 |
| P33293 | P14164 | Q02486 | P77744 | A0MES8 | C7J2Z1 | Q9SJN0 | P00519 |
| Q9USY4 | Q9FGF8 | P08874 | Q24174 | P39970 | P40535 | P32104 | Q96AP0 |
| Q9P8W3 | Q96WN6 | O14258 | P21192 | O31551 | P28614 | P78704 | P0ACT0 |
| P0C5S3 | P87000 | C5GF27 | A7EAG1 | P19219 | P06134 | Q5XEA3 | Q3AA35 |
| B8FXD7 | B0TDI0 | Q1GAA9 | B2GEY4 | Q38X69 | B1MZM2 | Q2RL77 | B2A610 |
| A4W0M7 | Q67MD5 | P23477 | P71073 | O06008 | P33234 | Q8CHC8 | Q9H2P0 |
| P07248 | P40634 | Q8IUX7 | Q7SXV2 | Q6GR30 | P39413 | P55197 | P51827 |
| P41765 | P52957 | Q9ZN78 | P25941 | Q2TA45 | P43464 | Q38841 | Q38847 |
| Q7XJK6 | Q4PSU4 | Q9FKK2 | Q9FJK3 | Q9C6V4 | Q7X9H9 | Q9C633 | Q42464 |
| P29369 | Q5HEG2 | O02219 | Q5TGY3 | A9YTQ3 | O44712 | Q8R4S5 | P0A3J5 |
| Q9LES3 | Q9M7Q3 | P33224 | O95831 | Q1PFE1 | Q6PQQ3 | Q52QU2 | Q91VJ1 |
| Q5VK71 | Q7Z591 | Q9YAX2 | Q971T6 | Q9FHA2 | P04546 | Q40359 | P15276 |
| Q10630 | O31249 | Q0VKZ4 | Q9L4M7 | Q57S50 | P33997 | Q04778 | Q91574 |
| Q9H161 | Q26657 | Q06453 | P40641 | P24734 | Q9URT4 | Q9ZVX2 | P41772 |
| Q84BZ4 | P10275 | P49699 | P79775 | E9PGG2 | Q9NLA3 | Q9CQM6 | Q07683 |
| Q38914 | P19655 | P56095 | Q01663 | Q9N0N3 | Q76HI7 | Q94AN4 | Q8GWK2 |
| Q9UBZ4 | Q06481 | Q06335 | Q9SAK5 | Q6LA43 | Q9FJ16 | P29673 | P61798 |
| Q8MSG8 | O74859 | Q08702 | P52659 | P07642 | Q9KBQ0 | Q24248 | A7X715 |
| Q01582 | Q5NB85 | Q94JM3 | O23661 | Q9ZTX9 | P93022 | Q6YVY0 | Q01K26 |
| Q7XSS9 | Q84WU6 | Q653H7 | Q0D9R7 | Q9LP07 | A6NJG6 | P07249 | P05085 |
| A9WQ89 | O14497 | Q62431 | A6NKF2 | Q9JKB5 | Q03989 | E7F888 | Q14865 |
| Q9LDD4 | Q68CP9 | Q940Y3 | Q6NQ79 | Q9Y4B4 | A4IHD2 | A7ZKT2 | O15945 |
| Q04052 | Q9KJC4 | Q9FXD6 | P62598 | Q9FGT7 | Q9M9B9 | Q940D0 | Q9LZJ8 |
| P13027 | P46003 | P15905 | P45949 | O42115 | A6YP92 | P24242 | P50553 |
| O35885 | Q9NQ33 | Q6XD76 | Q7RTU5 | P96677 | P40467 | Q6R0H0 | P34233 |
| P0ACI8 | Q9LS40 | P09774 | P10083 | Q8S9N6 | Q4PSR7 | Q9LZR0 | Q9FN29 |
| P0CJ65 | B4JND4 | P18846 | P52890 | P15336 | Q09771 | Q2KII1 | Q6NW59 |
| O70191 | P18850 | Q99941 | Q8R0S1 | Q9HFR4 | P48731 | P92953 | P46667 |

---

---

|        |        |        |        |        |        |        |        |
|--------|--------|--------|--------|--------|--------|--------|--------|
| Q8GXM7 | Q9UTN9 | Q9M3G7 | Q62388 | Q8N100 | Q99NA2 | P48987 | Q9U7E0 |
| P46100 | P82798 | P70486 | P83946 | Q9VXG8 | Q9DE14 | P0C7T5 | P54253 |
| Q8IRC7 | Q9SSW1 | P41696 | Q9SSW2 | O07920 | P0C7L5 | P22015 | P15308 |
| Q9W0K4 | P97302 | Q9BYV9 | P97303 | O07458 | Q6NTS2 | P22809 | Q8VBU8 |
| Q9VYG2 | P22544 | Q24256 | Q9NY43 | Q9HBU1 | O08686 | Q9N0M2 | P22035 |
| Q9NR55 | P97876 | E1BD44 | Q9UIF9 | Q9DE13 | Q9UIF8 | Q6PQQ4 | Q7XH85 |
| O06703 | Q8WY36 | P09081 | P55924 | Q9NYF8 | Q8GWK7 | Q38897 | O56862 |
| P29169 | O68014 | Q8G2M8 | Q9L4K2 | O23487 | Q84TK1 | Q8W2F2 | Q8W2F1 |
| O23090 | Q8S3F1 | Q9SVU6 | Q9T072 | Q9S7Y1 | Q9LTC7 | Q2HIV9 | Q9FLI1 |
| Q9SN74 | Q8VZ02 | Q9CAA9 | Q9XEF0 | Q8LEG1 | Q9M128 | Q3EAI1 | Q8GY61 |
| Q9ZUG9 | Q8S3D1 | O81037 | Q56XR0 | A4D998 | Q9LK48 | Q9FJL4 | Q9LV17 |
| Q9LSQ3 | Q84WK0 | Q9FJ00 | Q8S3D2 | Q9FIX5 | Q9LSL1 | Q9FXA3 | Q9C7T4 |
| Q9FYE6 | Q8VZ22 | O80674 | Q5XVH0 | Q9FYJ6 | Q94JL3 | Q9LT67 | Q9LRJ4 |
| Q9FLI0 | Q9LT23 | Q9C690 | Q8GXT3 | Q9STJ6 | Q7XHI7 | Q8H102 | Q9ZW81 |
| P0CB25 | Q9CA64 | Q93W88 | Q9M041 | Q9FGB0 | Q9LSN7 | Q9C8Z9 | Q9M9L6 |
| A3KNX5 | Q7RTU4 | Q9QYC3 | Q8NDY6 | Q9C0J9 | Q8UAA8 | Q9PFB1 | Q9LEZ3 |
| Q9FMB6 | P20384 | Q9FLU1 | E0U174 | P46363 | P42179 | P33651 | P06555 |
| Q9FXG8 | Q1PFD1 | Q9SJ56 | B3LP78 | Q94KL5 | Q8S897 | O65685 | Q9SJJ3 |
| O18017 | Q9I920 | Q9VGI8 | P54132 | Q8WYA1 | P39075 | Q01954 | Q9KPS0 |
| Q8L999 | O82286 | Q0JXE7 | P37335 | P56158 | Q9U903 | Q01295 | O01409 |
| Q95153 | P51587 | P10069 | O36398 | Q66652 | Q01012 | Q91998 | Q01108 |
| O08335 | P94403 | Q6RFL5 | Q04787 | Q24266 | P40408 | P52665 | P52666 |
| P24649 | P39736 | P55965 | P36627 | Q9FGX2 | Q9FUD3 | Q1HVG1 | O22763 |
| Q9M1G6 | Q54WU0 | Q54Y73 | Q55E93 | Q54RZ9 | Q86AF3 | Q54GG8 | Q554P0 |
| Q54Q90 | Q54T17 | Q54LU5 | Q54GH0 | Q54IJ9 | Q54GH2 | Q54GG9 | Q9LN63 |
| Q6P1N0 | Q9C7P1 | Q94JI5 | Q9LQM3 | Q3ECU8 | Q6H7U2 | Q9C9N3 | Q9C9F5 |
| Q6YVX9 | Q9ZUM0 | Q9SJ41 | Q6K687 | Q6K977 | Q8GX84 | Q5VR07 | Q0DVU4 |
| Q10MN8 | Q10M00 | Q8L7S3 | Q10EL1 | O48772 | Q84VG7 | Q0JDM0 | Q5PP65 |
| Q7XSB2 | Q9ZWA1 | Q7XM16 | O22243 | Q0J952 | Q6AT25 | Q6L4N4 | Q9C7C3 |
| Q941Q3 | Q65X92 | Q9LIH5 | Q9LT81 | Q0JP11 | Q93XW7 | Q9LVX1 | Q5ZA07 |
| Q0DBW8 | Q9STM4 | Q5Z5Q3 | Q9SD34 | Q0DA50 | Q9SV09 | Q5Z807 | Q8GW05 |
| Q6Z358 | Q9FNG6 | Q84ZT0 | Q9FL40 | Q6ZK57 | Q94CJ8 | Q6YYC0 | Q8L7N8 |

---

|        |        |        |        |        |        |        |        |
|--------|--------|--------|--------|--------|--------|--------|--------|
| Q69KP0 | Q9FKR9 | Q69NK8 | Q9SY74 | Q9FNZ1 | A3CEM4 | Q9LTS7 | Q2QTY2 |
| Q2QPW2 | Q56XU4 | Q5NAW2 | Q3ED78 | Q5ZDJ6 | Q9C7P4 | P30339 | P23890 |
| P26950 | P14984 | Q8QME6 | P54089 | Q91EK1 | P29178 | P29073 | O56129 |
| Q89551 | Q88886 | P31616 | P27256 | Q06909 | Q97Y84 | P38036 | G3ECR1 |
| Q7M3M8 | P39113 | P54269 | Q95RV2 | O74954 | O74412 | P49379 | P17106 |
| P40969 | P35203 | O43102 | Q11490 | Q46995 | Q03513 | P25144 | P37517 |
| Q8N726 | O77618 | Q64364 | Q09184 | P92948 | Q54WZ0 | Q9YFU8 | O27636 |
| Q97WM8 | P81413 | Q8W1E3 | Q93ZL5 | Q9SEZ3 | Q9HTH5 | Q8R4E9 | Q9I9A7 |
| Q05095 | Q99626 | O14627 | P81193 | P53566 | O02755 | P49716 | Q15744 |
| Q02638 | P34618 | A8AHC2 | Q756C3 | Q6BLT3 | Q03654 | O87590 | B2RD01 |
| Q0MXD1 | Q7RXR3 | Q0MXD0 | Q9Y812 | P48988 | P49451 | Q03188 | Q9USR9 |
| Q9D084 | F1NPG5 | Q96BT3 | Q561R1 | Q5EE01 | A8MT69 | A8WW61 | Q20646 |
| Q94126 | P20385 | O02326 | Q8N884 | P35168 | Q00858 | P43634 | P17410 |
| Q7KU24 | P32657 | Q22516 | O16102 | Q8TD26 | Q06A37 | B0R0I6 | Q09XV5 |
| Q966L8 | Q9NK54 | A7UXD4 | A7ERG1 | Q10103 | O42934 | P33647 | P08365 |
| P40685 | Q07783 | Q9U1H0 | Q96RK0 | Q9V6Q2 | P17867 | P52688 | P39127 |
| P19538 | O77027 | P30373 | Q95YE9 | O61735 | Q8PQ45 | Q9HAW4 | Q10241 |
| P14204 | O53922 | Q54JH6 | Q94F87 | Q94F88 | Q6NPP4 | Q80Y50 | Q9FYG2 |
| Q9LSP8 | P67732 | P53996 | P20482 | P37978 | Q9CJ45 | Q9BQW3 | P75974 |
| A6QNQ6 | F1R983 | Q99708 | O74986 | P40396 | P75952 | P25921 | P62536 |
| P14269 | P03267 | P41046 | Q24478 | Q00096 | O22059 | P22058 | P43079 |
| Q99090 | Q66HA2 | A2VD01 | Q91XE9 | Q502F0 | P0ACP3 | Q32M00 | Q8L925 |
| Q61817 | Q02930 | Q8K1L0 | P29747 | P51984 | P51985 | Q03060 | Q9YEY2 |
| A3MUI7 | P45815 | Q9SUQ2 | Q9FK12 | Q6PG95 | O76906 | P32027 | B3LSR0 |
| Q54YU6 | Q5IZC5 | Q7NMD1 | Q651U1 | P53968 | Q57824 | Q97Y88 | P62604 |
| P52106 | P37338 | P71635 | E7S4M0 | Q7U0Y5 | Q41188 | Q94C69 | P41018 |
| Q45100 | Q5R638 | Q9H175 | P59055 | P43460 | D0EL35 | A0JMF1 | Q2NKJ3 |
| Q9R1D1 | P0C1D3 | Q9USQ1 | Q6NU40 | P52958 | P52959 | P0CG11 | Q65ZA6 |
| P89105 | Q88XZ6 | O00841 | O07586 | O94588 | P15315 | P41817 | Q9BL02 |
| P39881 | P53564 | P53565 | Q752S4 | Q9P6R8 | Q4P400 | Q6CB23 | P53769 |
| O61734 | O34527 | Q8X4M5 | P22697 | P52675 | P39647 | P27369 | Q55854 |
| A0R8S0 | P28875 | O31844 | P21969 | Q925Q8 | Q09555 | P26343 | P21657 |

---

|        |        |        |        |        |        |        |        |
|--------|--------|--------|--------|--------|--------|--------|--------|
| Q16IB4 | Q29CW2 | Q82IW0 | P13483 | P32325 | P0A3H7 | Q92HL4 | Q44625 |
| Q9RZ89 | P02345 | O83278 | Q9PQK9 | Q32PF6 | A5PKG8 | Q17QR5 | Q91975 |
| Q14AI0 | Q09732 | P45876 | Q8X5P3 | A1A4K3 | Q21554 | B0M0P5 | O13807 |
| Q5ZJL7 | Q99J79 | Q755A0 | Q08949 | Q9XFH4 | Q9RX92 | Q9RY80 | Q96FC9 |
| Q0HK5  | Q9JJY4 | O00571 | Q24180 | Q8QZV0 | Q75DE9 | Q5AMM4 | C4YHS3 |
| C4Y1P0 | Q6CTH5 | A5E406 | C5E4K0 | P15263 | P54662 | P41894 | Q7TNV0 |
| P0ACK7 | P95193 | P07548 | P16931 | P45512 | Q9RAJ1 | Q9CIV9 | O70133 |
| P06965 | Q9SNW8 | Q24533 | P98149 | Q54ER9 | B6VQA1 | P54394 | Q8X7X9 |
| P29741 | Q5HP88 | Q47150 | Q82EA6 | B2SB45 | Q8S9H7 | P53772 | P20009 |
| P40764 | Q64204 | P87394 | P56179 | Q9SR66 | O49498 | Q9PUE0 | Q9QZ59 |
| P57690 | Q9Y5R5 | Q80WT2 | A2A9I7 | Q96SC8 | Q6DG03 | Q8CE22 | B0HIG7 |
| P13123 | Q6ZQJ5 | Q9URU2 | P38859 | O66659 | B8FFL8 | Q6ARL8 | B8DN19 |
| Q72WD6 | P24116 | P35889 | Q59549 | Q6YRL3 | P34028 | A0LE53 | C5BKL9 |
| P35907 | P07908 | O78411 | O25916 | Q9F5P4 | P46394 | P75539 | P51333 |
| Q1RI04 | O83097 | P03264 | Q65956 | P05662 | P36704 | Q03444 | P28932 |
| Q18LF9 | P17147 | Q6UDK2 | P32761 | Q9Y6K1 | O88509 | P34881 | Q9Z330 |
| P15017 | Q06259 | P68349 | Q9FZA4 | Q9SX97 | Q84JQ8 | Q8LE43 | Q9ZV33 |
| Q9ZPY0 | Q94AR6 | Q39088 | Q9SVC5 | Q43385 | Q9M161 | Q9SUA9 | O49550 |
| Q9LZ56 | Q84TE9 | Q8LDR0 | Q9FM03 | Q9NDJ2 | P15330 | Q8TEK3 | Q04089 |
| Q5UZ40 | Q18ER3 | Q9V2F4 | P81409 | O28484 | B0R7U1 | Q58113 | O57863 |
| Q9FNY3 | Q6FSK8 | P0CN25 | Q6BQR8 | Q6C030 | Q9FNY2 | Q26263 | O67779 |
| O08307 | P52027 | Q9ZJE9 | P09804 | Q92GB7 | Q9RAA9 | Q55971 | P74933 |
| P05468 | P63988 | Q98JM5 | Q8YC76 | A3DH61 | Q8REB0 | B0R4P0 | Q8EQ56 |
| Q9AK82 | Q4JB80 | Q73P36 | B1AJ79 | P13382 | P28340 | Q54RD4 | A7YWS7 |
| Q54Y85 | Q3SZN5 | Q75JQ9 | Q9CQ36 | Q92076 | P54098 | Q0VC30 | Q9W6G7 |
| Q12704 | P15801 | O93745 | P26811 | Q07635 | P95979 | Q54SV8 | P26019 |
| O48653 | Q27152 | Q6DRD3 | Q9UGP5 | P42494 | Q7T6Y4 | O60673 | A4ZU91 |
| Q64751 | Q88469 | O36363 | P43139 | O64235 | P03680 | P10479 | Q38087 |
| P06225 | P20311 | P19822 | P30319 | P03162 | Q6GZR5 | P08546 | P07918 |
| P28859 | Q196U0 | Q9QSK2 | Q58295 | P52025 | Q5UQR0 | P30318 | Q84173 |
| P30321 | A7U6F2 | A7U6F3 | P61875 | P77933 | Q51334 | Q85428 | O70736 |
| O33845 | P74918 | P30317 | Q4U3V0 | P12899 | P11292 | P30322 | P22374 |

---

---

|        |        |         |        |        |        |        |        |
|--------|--------|---------|--------|--------|--------|--------|--------|
| P10582 | P33537 | P33538  | Q01529 | P14284 | A6NFQ7 | Q9RS64 | Q8YQL3 |
| A0R692 | Q8U1L3 | Q6REU5  | Q0J3Y6 | A2WL19 | Q5W6R4 | Q8LFR2 | Q84ZA1 |
| Q65WX1 | O80917 | Q10R18  | Q9SVX5 | Q9SIZ0 | Q9LYD3 | A6NNA5 | Q4H3P5 |
| Q8MQH7 | Q9M548 | Q7PN68  | P24274 | P46068 | P55265 | Q99MU3 | P23023 |
| Q4JV96 | P0CJ85 | O43812  | O75505 | Q6RFH8 | A6NLW8 | O81900 | Q01094 |
| P56931 | O00716 | Q16254  | Q15329 | Q08DY6 | E1BE02 | Q5RIX9 | F1QZ88 |
| Q9FV71 | Q9FV70 | Q9LFAQ9 | Q8LSZ4 | Q66K89 | P11536 | Q7M3M6 | P17672 |
| P17671 | P50239 | O77245  | P45447 | Q0SN44 | P06846 | Q1HVF7 | Q46967 |
| P32644 | O69280 | P49880  | P49881 | P34021 | O18531 | B3LNB2 | O80337 |
| Q9FKG1 | Q9LY05 | Q9SZ06  | Q70II3 | Q9LYU3 | Q9LY29 | Q8GW17 | Q9M9B2 |
| Q9LUA2 | Q9FGC9 | Q38Q40  | P29692 | Q09228 | Q19849 | P17486 | P15370 |
| P18146 | P26634 | P11161  | Q05215 | Q32LN0 | O23115 | O23116 | O24606 |
| P32519 | Q15723 | Q4V7E1  | Q99607 | Q04688 | P41969 | P28324 | P28515 |
| Q8WYP5 | Q5U249 | P25032  | P66800 | Q6PJG2 | P15858 | P18488 | Q04741 |
| Q58030 | P63541 | Q9WYK0  | P64159 | A8AJA5 | P27871 | P25696 | P0ACT3 |
| Q96L91 | Q8CHI8 | P97481  | P30198 | A2BGR3 | Q2NKX8 | Q9MA98 | Q55GG6 |
| P14629 | Q03468 | Q94AW5  | Q9CAP4 | Q9C591 | Q9S7L5 | O80542 | Q84XB3 |
| Q9LQ28 | Q1ECI2 | Q9FJ90  | Q9CAN9 | Q9LU18 | O80654 | Q9ZQP3 | Q52QU1 |
| Q9SKT1 | Q9SIE4 | Q40478  | Q9C7W2 | Q9C995 | O22259 | Q8H0T5 | Q9ZWA2 |
| Q9LDE4 | Q9M8M5 | Q6J9Q2  | Q9FZ90 | O49515 | Q9LND1 | Q9LTC6 | P93822 |
| Q8L9K1 | Q56XP9 | P04892  | P70459 | Q01414 | O95718 | P62508 | Q6C5G3 |
| Q6FML7 | Q6BY37 | A5DF43  | C4R1K8 | D8Q8R5 | Q4PD88 | P26337 | Q04635 |
| Q01797 | P25932 | Q01068  | P96228 | Q9SAD4 | Q91424 | P49886 | P16058 |
| Q9FYK5 | Q9PTU5 | Q9TTE5  | P57781 | O74804 | P17214 | P52667 | Q8N693 |
| Q9YVX9 | O93120 | Q9YW29  | Q9QB84 | P38071 | P13474 | P15062 | P18756 |
| P29773 | P29774 | P29775  | P29776 | Q6ZN32 | P28322 | P41161 | P97360 |
| P36547 | P06602 | P0ACZ6  | B7ZRU9 | Q24312 | O67550 | Q9KAV6 | P54161 |
| Q49406 | Q98PK2 | Q10699  | A8R3S7 | Q8L6Z7 | Q54ED2 | Q24558 | Q9UQ84 |
| P53695 | P39875 | Q9FKK6  | Q75A64 | Q59ZZ6 | Q6FJK6 | C5M3V9 | C4Y732 |
| Q6BKP5 | C4R7Q5 | A3M0E6  | Q9Y7L4 | B3LMZ5 | Q84T68 | P96440 | P26993 |
| Q9J5B7 | P68454 | P20222  | A7ZUI3 | A5F6Z2 | Q56YJ8 | Q9NV11 | Q8IYD8 |
| P23774 | B0K9Y3 | Q8JIT7  | Q9USU3 | O93870 | Q8X229 | Q02360 | Q02361 |

---

---

|        |        |        |        |        |        |        |        |
|--------|--------|--------|--------|--------|--------|--------|--------|
| P32029 | Q84JK2 | Q47129 | P23484 | P00214 | Q923Z4 | Q9VGJ5 | A3FEM2 |
| A0PJY2 | Q9ZVH0 | P87114 | O74842 | O14270 | P39521 | P19323 | Q6QHK4 |
| P37928 | P0AEL9 | P18809 | P64130 | Q8PQ10 | Q5F881 | Q5F882 | Q0V7X4 |
| P26488 | P13295 | Q26486 | P40466 | P41813 | Q19802 | P14734 | P17899 |
| Q39LF8 | D5W6H7 | Q0K2R3 | Q46TH1 | Q2NX28 | C5CXR6 | Q39LF7 | Q9X600 |
| P29248 | P52618 | Q59QW5 | P29284 | O13360 | P35692 | P51007 | P24290 |
| Q46158 | Q9CMY2 | P60622 | Q8IX07 | Q8WW38 | B4JYN3 | B4NBL5 | B4PPK2 |
| P23050 | Q9Z2Q8 | P01102 | O02761 | Q99853 | Q5VYV0 | Q12948 | Q63246 |
| O60548 | Q12950 | Q60688 | Q5J3Q5 | Q9PTK2 | O54743 | Q9VS05 | Q1A1A6 |
| Q9I9E1 | O88621 | P70056 | B5RHS5 | Q8BUR3 | P85037 | Q01167 | Q12952 |
| Q08050 | O15353 | Q28F43 | O00409 | Q3BJS0 | O43524 | Q70KY4 | O16850 |
| Q5W1J5 | Q8HZ00 | Q9BZS1 | Q9DBY0 | Q6PJQ5 | O43638 | Q0VG06 | O80358 |
| Q5UQ00 | Q4FUU7 | P35693 | Q8X835 | O31713 | Q8IN81 | P32152 | Q2YJF8 |
| Q8XRH0 | Q9JUK9 | Q9RXB5 | Q8ZS46 | O83045 | Q8G4H3 | O51272 | Q0PA12 |
| Q8KBK0 | Q8FPC1 | P45264 | O25722 | O05560 | Q8ZQD5 | Q8EER3 | Q8E418 |
| O83964 | Q87QP4 | Q8ZGC7 | P49867 | P48590 | Q3U0V1 | Q96I24 | P0ACK8 |
| P31380 | O69450 | P0A583 | O28051 | A8FKI7 | P45599 | Q55244 | P74739 |
| Q8J1X7 | P35637 | Q4VC44 | Q9NU39 | Q9PT68 | Q66IG8 | Q708W2 | P32805 |
| P25858 | P46672 | P15417 | O80294 | P03671 | P03672 | P68676 | Q06546 |
| P63206 | P63202 | Q9EYV5 | Q10280 | P03373 | O56860 | P10258 | P03343 |
| P04386 | Q06433 | O84905 | Q88JX7 | P25748 | A2WW87 | O07008 | Q8VZP4 |
| Q9M1U2 | Q8LG10 | Q9LIB5 | Q8LC79 | P23768 | P43574 | Q5HZ36 | Q8LC59 |
| Q8W4H1 | Q8H1G0 | Q9LT45 | P40209 | P40569 | Q8LAU9 | P17678 | P15976 |
| P23769 | Q8L4M6 | Q9FH57 | Q92908 | O65515 | Q9SV30 | O82632 | P52167 |
| P36930 | P42774 | P42777 | P36417 | P52661 | P25547 | Q14549 | P82976 |
| P16383 | Q9NP62 | Q9VLA2 | O75603 | P03069 | Q9PU65 | P07261 | O73673 |
| P0A9F8 | P34333 | P11470 | Q6DCW1 | P70338 | P39572 | Q03833 | P27900 |
| P13360 | P0ACL6 | P94591 | P55878 | Q91690 | P55879 | P10070 | P10075 |
| Q8K1M4 | Q7K0S9 | Q9BZE0 | Q6XP49 | Q1BYA7 | Q58815 | P18494 | P40759 |
| Q05943 | P20668 | P54717 | O87389 | Q9Y692 | O05509 | P46833 | Q06003 |
| Q3KR53 | Q28FE5 | Q9U405 | O51157 | Q82I57 | O83063 | Q8ZJH2 | Q8TE85 |
| Q43472 | F8DT92 | Q9C469 | P09083 | P54366 | A1Y5Y5 | Q754J3 | Q6FLG1 |

---

---

|        |        |        |        |        |        |        |        |
|--------|--------|--------|--------|--------|--------|--------|--------|
| C4Y4V1 | Q6CK33 | A5DU46 | C4QV17 | B3LQ10 | C5DX31 | P31316 | Q9JI57 |
| A4IFA3 | Q54L82 | Q44929 | P78347 | Q8H181 | P29588 | P15081 | P39143 |
| Q9CAF6 | P21557 | Q49166 | Q57532 | P72065 | P34030 | P0C0Q9 | Q44273 |
| Q9FAX2 | O33367 | Q1RHT8 | Q9H116 | Q99282 | Q94890 | P40274 | P40268 |
| Q5RKG3 | Q8IZA3 | Q86QH9 | Q86QI0 | P22974 | P22975 | Q99284 | Q18336 |
| Q6FJX6 | P32103 | P84408 | P37218 | P12305 | P53551 | Q9XG56 | P09589 |
| A2Y5G8 | Q9T0H7 | P0C5Y9 | Q54HV7 | Q5Y2C3 | Q8SSG3 | P59890 | P82897 |
| Q6DRA6 | Q9SGE3 | P0C1H6 | Q7Z2G1 | Q8SRE2 | Q9MBF7 | P81195 | P06353 |
| Q9XG57 | P40287 | Q12753 | Q8TFU8 | P41546 | O29910 | P29303 | O43593 |
| Q8I7Z8 | Q0VCE2 | P0CE41 | P53768 | P06774 | P40914 | P36611 | P13434 |
| P79007 | Q02516 | P46665 | P46604 | Q02283 | Q9SEZ1 | Q9XYD3 | P23922 |
| Q8R316 | Q54PU1 | Q54LB3 | Q54I65 | Q54F11 | P42585 | Q86IH1 | P55813 |
| Q54ZP8 | Q54YI1 | Q54X22 | Q54VB4 | Q47141 | Q01239 | P25364 | A8XA80 |
| O33817 | Q9PLI1 | Q46397 | Q8SW18 | Q8SRR1 | Q8SUB7 | Q9FDX8 | Q8SR09 |
| Q8STR8 | Q8SVT3 | Q8SVT6 | Q8SW50 | Q7SI91 | A1JI47 | Q9FFI0 | P51858 |
| Q8UW74 | Q9FHA7 | Q9LXD8 | O32215 | Q6QB00 | A6NFD8 | Q7TS99 | Q9BYK8 |
| Q5IW40 | C0H4W3 | O57337 | Q00P32 | Q9HCC6 | P70120 | Q9BYE0 | Q93CE9 |
| P46118 | Q9QUS4 | Q7KM13 | Q84MN7 | Q93VB5 | Q1PDN3 | Q5Z6A4 | Q9LUH8 |
| Q9M1V5 | P27343 | Q7XRX3 | Q652B0 | Q6VBA4 | Q942D6 | Q6EUG4 | P51979 |
| Q9FE22 | P0ACE5 | D2KQB0 | Q05502 | Q9JLZ6 | Q7N1I3 | Q3KJK7 | Q61221 |
| Q9Y2N7 | Q9KMG4 | Q9KMA5 | P67702 | Q5PEB1 | E1WAC0 | P60008 | Q9QYL0 |
| Q9BQA5 | Q8FHF3 | Q8NCD3 | Q02308 | Q20561 | Q18053 | P90953 | P34555 |
| Q01622 | P21523 | Q92GN5 | Q14527 | P52695 | P53547 | P20269 | P20268 |
| Q94398 | P56407 | P41935 | P17487 | P12902 | P20271 | P34326 | P15857 |
| P26797 | Q5ZKF4 | Q32L68 | P41779 | P41936 | P34663 | Q9NLC2 | P34522 |
| Q23175 | Q94166 | Q94165 | Q93352 | Q19720 | Q22812 | Q18273 | P15142 |
| P17138 | P0CY07 | P0CY09 | P13545 | P10179 | Q6NT76 | P06116 | P31537 |
| P09065 | P09076 | O02491 | Q05640 | P02836 | P09145 | P23397 | A9ZPC9 |
| P09532 | Q9LG02 | Q941D1 | Q09390 | Q9MAT6 | P40622 | Q24537 | Q23794 |
| O49595 | P10103 | P07156 | Q9SUP7 | Q9SGS2 | P40626 | P11873 | P40628 |
| P82970 | B4F777 | Q12766 | Q9UGU5 | Q10370 | P10035 | Q00401 | Q12039 |
| P05527 | Q03973 | P22810 | P31264 | P0CY13 | P58378 | Q12398 | P47175 |

---

---

|        |        |        |        |        |        |        |        |
|--------|--------|--------|--------|--------|--------|--------|--------|
| Q03576 | Q9DE09 | Q9NP08 | A2RU54 | Q9VEI9 | Q26656 | Q6NU14 | Q90867 |
| P41235 | Q14541 | P49866 | P42587 | O14979 | Q3SWU3 | Q14103 | Q3T0D0 |
| P0AEV2 | P0ACG0 | P12258 | Q8IX15 | P20050 | Q54UM1 | Q9P2W1 | P53187 |
| A2Z1U1 | Q67UE2 | A2XDK5 | A2XDD6 | Q01I23 | A2YGL9 | A2XE76 | P46605 |
| Q8S7W9 | Q01IK0 | A2Z0Q0 | A3BYC1 | A2Y931 | Q5QMZ9 | Q84U86 | P50901 |
| Q9XH36 | Q9XH35 | Q99160 | P09932 | P62573 | Q9JN69 | Q56185 | Q65LS8 |
| P49870 | P49869 | P31396 | P49868 | Q24142 | Q24143 | P18182 | P18184 |
| P31778 | P37929 | P37930 | P26316 | Q00613 | P22335 | P38530 | P38531 |
| Q1HGE8 | Q5ND04 | Q40152 | Q8GYY1 | Q6K6S5 | Q9S7U5 | Q9LVW2 | Q10PR4 |
| O22230 | Q9LV52 | Q9UBD0 | Q96LI6 | Q8SS62 | B7XIV9 | P22121 | C4V6H6 |
| P41154 | P10961 | P0ACH0 | P83211 | P83183 | P40183 | Q10076 | Q60420 |
| P51514 | O53478 | O46339 | Q8RVQ9 | P31505 | O18326 | O96785 | O46238 |
| Q01778 | Q01791 | P26408 | Q09811 | Q7TMY8 | P51593 | P42505 | P42507 |
| P31310 | P50210 | P31271 | Q08821 | P31261 | Q00056 | P81192 | P09635 |
| P50208 | P09637 | P24061 | P09634 | P51783 | Q98924 | Q1KKX5 | P31357 |
| Q1KKX7 | O13074 | P14838 | P14839 | P23681 | P09078 | P18863 | Q9PWL7 |
| P28174 | P18865 | Q1KKU7 | P31262 | P49925 | O42503 | P18866 | Q28601 |
| Q9YGT0 | P24341 | P31277 | P13544 | Q1KKR7 | P28356 | Q1KKR8 | O24646 |
| Q8W191 | Q8V518 | P20499 | O72902 | Q9RQQ0 | Q9LSE2 | P16528 | P29128 |
| P28284 | P29129 | P28925 | Q02362 | P90493 | Q6UDF2 | P09310 | Q6Z1Z3 |
| P06435 | Q9QJ16 | P09309 | Q9UTM0 | O14210 | P40154 | Q9P7S9 | Q16666 |
| Q9R002 | Q5EA95 | Q9K4Q3 | Q8Y0Y3 | Q6NRM0 | Q6XDT6 | Q6XDT4 | Q9VG73 |
| Q6DD04 | Q6GL57 | Q9FH37 | P52670 | P20839 | P13772 | P96631 | P0CF49 |
| O81313 | P0CE57 | P26798 | P13902 | Q2UTQ9 | P0CO17 | Q6BGY8 | Q9VDY1 |
| A5E0W5 | Q6ZPV2 | Q872I5 | Q4PGL2 | P0CF60 | P0CF66 | P0CF79 | P03835 |
| P19769 | A6H7J1 | Q96T92 | P75679 | P39213 | Q47718 | P76102 | P71956 |
| P69342 | P46337 | P24350 | P43610 | P14316 | Q90643 | Q14653 | Q15306 |
| Q92985 | P70434 | Q02556 | Q61179 | P81067 | P78413 | Q9JKQ4 | P78412 |
| Q9KTY3 | P53409 | P15025 | P16944 | Q08773 | Q2M1V0 | Q90683 | P33417 |
| A4H7G5 | Q60976 | Q9FUY6 | P18289 | P13468 | Q68DE3 | Q8GGL1 | Q8UVQ4 |
| Q941I2 | Q9FJV5 | O61016 | Q8IS98 | A1C9M5 | P50844 | P76268 | P37728 |
| Q5U263 | P41249 | O65155 | B0X9H6 | P60319 | Q14807 | Q2VIQ3 | P19653 |

---

---

|        |        |        |        |        |        |        |        |
|--------|--------|--------|--------|--------|--------|--------|--------|
| O60870 | P42968 | O65154 | P52604 | Q52279 | P13967 | O14901 | Q9Y4X4 |
| Q19A41 | Q9UIH9 | Q5JT82 | Q13351 | O43474 | Q13887 | O75840 | O95600 |
| O53838 | O04134 | P48000 | Q84JS6 | Q94LW3 | Q75LX7 | Q948L5 | A2Y007 |
| O65034 | Q0J6N4 | P56659 | P13054 | P22405 | P07674 | P22404 | Q52277 |
| P07247 | Q25515 | A0R4Z6 | Q0S868 | P0CO51 | Q54MA9 | Q23976 | Q7F1M0 |
| O94395 | Q6CCK2 | P32807 | Q2H6C5 | Q9HGM8 | Q6C7B9 | Q04437 | Q64756 |
| P08657 | P03023 | Q01936 | Q7WTB0 | O33813 | Q9M0K4 | Q03474 | P42166 |
| P25084 | Q7XAQ6 | P40796 | P23913 | Q1XID0 | Q6XYB7 | Q3SX41 | Q8N3X6 |
| Q1PFR7 | P41453 | Q9M644 | P10151 | A8MZ59 | P23914 | A0LUZ1 | O32506 |
| Q00958 | P0C7P8 | Q7XJU0 | Q9XIN0 | P36198 | Q25132 | P50481 | Q9UPM6 |
| O35652 | Q68EY3 | Q6R0H1 | Q27395 | O85057 | P20154 | Q11107 | Q9GNL2 |
| P34683 | Q10574 | P34427 | P34684 | Q08CM4 | A1Z9E2 | Q5RBN8 | Q9ZN79 |
| Q8UVR3 | P42283 | Q7KQZ4 | Q867Z4 | Q9V5M3 | Q7KRI2 | Q54YV4 | Q550C8 |
| Q6FPE6 | Q7KUT2 | A2YQ56 | Q6C0B5 | Q9W349 | Q06260 | P42704 | P96652 |
| P96582 | P45265 | P56901 | P52691 | O93774 | Q9Y802 | Q10135 | P65649 |
| P52689 | P13894 | P03073 | P03070 | Q51872 | O07007 | O87455 | Q9KT84 |
| P21308 | Q9H930 | Q13342 | P12980 | Q980W9 | P03030 | Q740J9 | Q4L8V4 |
| Q6P0N0 | Q80WQ8 | P37935 | P37938 | O18214 | P10038 | P35192 | P01549 |
| Q6VAM4 | A2YQK9 | Q655V4 | Q84NC2 | Q2QW55 | Q5K4R0 | Q2V0P1 | B3MB79 |
| B3MZY6 | Q16YA8 | B4IB36 | Q96JY0 | A7Z017 | P53338 | P18811 | P96158 |
| Q93K57 | Q56201 | P0A4T1 | Q7N976 | A6QQ70 | P78926 | P0ACH6 | P27245 |
| O59851 | Q02991 | Q9UW23 | Q708A7 | Q9HG12 | Q707Y6 | Q707Y3 | Q71U11 |
| O93958 | A7ZI28 | P36981 | Q10116 | Q6WRX9 | Q6WRX8 | A7MFW6 | P52684 |
| P52161 | P0CL59 | Q8VJR2 | P0AE73 | P56270 | P56670 | Q9S7G7 | Q9XI36 |
| Q9FZP6 | Q9LTJ8 | Q5XEN5 | Q9Z2E2 | Q9Z2E1 | Q4PSK1 | Q9LYB9 | O95243 |
| Q9LTJ1 | Q9FJF4 | Q9LME6 | Q9SGH2 | P13657 | Q52BY4 | Q95YM8 | P39678 |
| P76114 | P67741 | Q1LWL8 | Q0VBD2 | Q5AFP3 | P11746 | P49736 | P40377 |
| P30666 | P24279 | P30665 | P29496 | P49731 | P53091 | P38132 | Q0V9Q6 |
| F1QDI9 | Q9VF30 | Q9UXG1 | P15005 | Q8QHI2 | Q9IAC6 | P79404 | Q9BDJ7 |
| Q54S00 | A6NDR6 | Q04719 | O10368 | Q02574 | Q00566 | Q15648 | Q9FT73 |
| Q5XVF0 | Q9FRI0 | Q02080 | O55087 | P40791 | O13606 | O00470 | O14770 |
| A2SXS5 | P50221 | P50222 | Q9DGW5 | Q51773 | P0A183 | P22874 | P30346 |

---

|        |        |        |        |        |        |        |        |
|--------|--------|--------|--------|--------|--------|--------|--------|
| Q9BRJ9 | Q0VG99 | P40573 | Q03081 | P32389 | A7MXB2 | P0A9G0 | P45349 |
| P52003 | P37474 | O51568 | P57381 | P30958 | Q9ZJ57 | P64327 | O52236 |
| Q55750 | Q9UT23 | Q9LW85 | P95037 | Q6FK91 | Q8MYF0 | O14354 | Q4P4Y2 |
| P32787 | P53050 | Q8IW19 | Q6TDU1 | Q6CPW2 | A5E7M8 | A3LZM4 | A6ZXD3 |
| Q2G0B1 | P77569 | O31672 | Q7T105 | P35201 | Q9Y7G2 | P52288 | P27705 |
| P39943 | Q96T58 | O88368 | P21711 | Q9H2W2 | P28482 | Q8BIA3 | P50456 |
| Q32KY3 | P40631 | Q03164 | Q8NEZ4 | P33358 | Q9HAP2 | Q9UH92 | P28809 |
| Q32L19 | P53102 | P41218 | P13669 | P67711 | O08789 | Q9QZW9 | A1KNB8 |
| P07112 | Q9UT46 | P49309 | P58497 | Q92DX9 | Q7JQ07 | Q07608 | O43065 |
| P22915 | P29904 | Q75AA7 | Q2URJ5 | Q6BRF0 | Q6CQX2 | A7EFH4 | A7TSV4 |
| P0ACS1 | P43161 | Q46864 | Q86567 | Q96LU7 | Q9Y2G1 | P37960 | P21649 |
| Q90ZL1 | A6NI15 | Q84LK0 | O13921 | O74773 | P25847 | A6R7S1 | O65607 |
| Q59Y41 | P0CO93 | Q1ZXH0 | P20585 | Q4P6I8 | Q6CHE5 | F4JP48 | O94065 |
| P40965 | F4JEP5 | Q19272 | O43196 | O04716 | Q55GU9 | Q9VUM0 | P52701 |
| Q03834 | Q9SMV7 | O63852 | P50534 | Q00753 | P22148 | P33748 | P33749 |
| P28361 | P52953 | P70354 | Q13330 | Q9BTC8 | Q9UW19 | Q874N0 | Q08398 |
| Q9UW22 | Q874N1 | Q9HDS5 | Q707Y8 | P71039 | Q96E29 | Q99551 | Q14872 |
| Q01214 | Q9Y829 | Q9US51 | Q9Y483 | Q870I4 | P96574 | P0AF11 | P83733 |
| P23737 | P34877 | P15840 | P34496 | A8APW0 | O68583 | Q4QK86 | P43640 |
| Q5W9E7 | Q8GT06 | O60682 | Q9M8K6 | O51125 | Q3ABU1 | C4XS37 | C1A4A9 |
| B1MXB4 | B2V693 | P73625 | Q9X105 | Q5UQU6 | Q0SM54 | Q04RT2 | Q4FV41 |
| P14981 | Q9QPN4 | P50541 | P0A2S7 | Q9FNV8 | Q2V9B0 | P81392 | O22264 |
| P20024 | O13493 | P80074 | Q8IEF6 | P80073 | Q8GWP0 | P20027 | Q9FDW1 |
| Q9LX82 | Q9SZP1 | Q7XBH4 | Q38850 | Q9LTF7 | Q8LPH6 | Q9ZTC3 | Q9S7L2 |
| P52550 | P34127 | O15816 | P48972 | Q54TN2 | P10290 | Q54K19 | P01105 |
| Q54IF9 | Q54Z40 | Q54HX6 | Q869R9 | Q54NA6 | Q55GK3 | Q54FL0 | P27898 |
| P01104 | P01103 | P04197 | Q9PSJ0 | Q7Z401 | Q17103 | Q9W4S7 | Q9P2K5 |
| Q9NPC7 | Q17295 | P15172 | P22816 | Q86VE0 | B6MUN4 | Q5F3F2 | P97500 |
| Q6GN21 | Q8H115 | A2YMR0 | Q9LPI7 | Q9C932 | Q0WV96 | Q84TE6 | Q8GY42 |
| Q9S851 | Q5PP28 | Q9SK55 | Q84WP6 | Q9FRV4 | Q7EZT1 | A8MQY1 | Q52QH4 |
| Q9LR74 | Q53NF7 | Q7GCL7 | Q5Z6B6 | Q84K00 | Q9FWX2 | Q9C598 | Q94F58 |
| Q9FMR3 | Q9FIW5 | O04017 | P70670 | Q47005 | P39667 | P27278 | Q9EXL7 |

---

|        |        |        |        |        |        |        |        |
|--------|--------|--------|--------|--------|--------|--------|--------|
| Q7Z5D8 | Q9H9S0 | B7UJV9 | P25293 | O53856 | Q3MHZ1 | Q9FLJ2 | Q2YDP3 |
| Q9VJQ5 | Q9WUB5 | Q8QG78 | Q9Y618 | P0A3S0 | P46581 | Q62414 | P22392 |
| P25233 | Q02835 | Q96FI4 | Q969S2 | P67431 | P06903 | P06020 | P46496 |
| Q5ZL67 | Q5NUA6 | Q9Y4A8 | Q91431 | O88942 | O77638 | Q12968 | Q14934 |
| Q9WV30 | Q5EAD3 | Q02780 | P97863 | P14057 | P13623 | Q04861 | Q63369 |
| Q18034 | Q54BK0 | Q12986 | P32265 | Q9LXV5 | Q9M9X4 | Q93ZH2 | Q8VY64 |
| Q945M9 | Q54S29 | P23511 | Q9SLG0 | O23310 | Q60EQ4 | O04027 | Q65XK1 |
| Q84W66 | Q9SIT9 | Q9SFD8 | Q54WV0 | P25211 | Q9FMV5 | Q8L4B2 | Q58CM8 |
| Q557I1 | Q13952 | Q9MAN1 | P70660 | Q9Y4Z2 | O17611 | O16966 | O45449 |
| Q9TZ99 | O16391 | O17082 | O16963 | O01931 | O17657 | O17683 | O17748 |
| O17934 | O18048 | O02305 | O18086 | Q6NV18 | Q6AYI4 | Q03435 | P0CO25 |
| P87057 | P41999 | Q23294 | Q21701 | O02151 | Q09528 | Q21878 | Q25604 |
| Q09587 | P41828 | Q19345 | Q17905 | Q18192 | Q21006 | Q17771 | Q9XTJ4 |
| Q9N4B8 | O76828 | Q22555 | Q17370 | O45666 | O45436 | O17927 | O17933 |
| O16425 | Q9TXJ1 | Q9NA51 | O62389 | O44960 | Q9XVV3 | P91829 | P41829 |
| O16604 | O02316 | O18141 | Q20765 | Q965W2 | O02235 | Q9XYB7 | Q9U2R6 |
| Q23489 | P52392 | Q9XIT8 | Q88FY0 | P30667 | P56269 | P24426 | O26703 |
| B0R2R5 | Q8TV90 | C3N649 | Q8R5U7 | Q02441 | Q07597 | P19212 | P28349 |
| Q15270 | Q9UD57 | P50220 | O95096 | O15522 | P97436 | P78367 | P70061 |
| Q9C056 | Q7X9B9 | Q0JC27 | Q9SVF1 | Q9LE38 | Q8RWY4 | Q84TH9 | O22864 |
| O69711 | O60393 | Q8VIH1 | Q00678 | B1HPM0 | P04682 | P15940 | P22537 |
| Q5FVM4 | Q2FKF1 | Q01709 | Q00790 | Q06615 | P97459 | Q8IXF0 | Q1ECW2 |
| B1Q2A8 | Q61937 | P43130 | P68950 | Q89707 | O10440 | Q3UV55 | P55055 |
| O35627 | P51179 | P45448 | Q64249 | Q2JVG1 | Q90X44 | Q62792 | Q03125 |
| Q923B3 | Q1W1G1 | O96028 | P03565 | Q06661 | P27476 | Q9L132 | P33779 |
| O07567 | Q96KG9 | P29814 | O72907 | P10577 | Q04849 | P49790 | Q9W0T1 |
| Q0P569 | Q9FVQ1 | P08199 | Q9HSL7 | B3DTU8 | Q8ZWG7 | Q8U4R1 | O60356 |
| P39720 | Q75BN0 | Q6FJJ1 | Q6CXS0 | A7TGQ2 | B3LRD9 | C5DUX2 | P42641 |
| P52379 | Q6UDH3 | P0A4T4 | P24068 | P23803 | Q50EX6 | P41933 | Q9FNY7 |
| Q8TAK6 | Q13516 | Q24432 | Q6XBJ3 | P12959 | P39768 | P21957 | P27872 |
| Q95RW8 | Q58DC8 | Q6BSE2 | Q54RM2 | Q8I615 | P54789 | P54784 | Q55CU7 |
| Q9JK30 | Q10067 | P54790 | Q2YDI2 | Q9Y794 | P54791 | Q54C22 | Q9ZVH3 |

---

|        |        |        |        |        |        |        |        |
|--------|--------|--------|--------|--------|--------|--------|--------|
| Q9Y1B2 | Q9WUJ8 | O74796 | P38826 | Q9M1K0 | Q9FVS2 | Q681I0 | P72171 |
| Q9N6K2 | Q9SX99 | Q8GXH3 | Q8GWJ4 | P56672 | Q5XKR4 | O76971 | P80205 |
| Q26417 | Q9BRP0 | P51521 | O87883 | Q89769 | Q65245 | Q04073 | O43422 |
| Q00366 | Q64662 | B3DM25 | Q9H3D4 | P28813 | Q753Y2 | Q873Y3 | Q6FV94 |
| P0CS63 | Q6BSZ4 | Q6CQ07 | Q8J257 | Q6H8R9 | P78978 | P33400 | P10590 |
| A8XSQ8 | Q86YC2 | Q3U0P1 | P91943 | Q9SX27 | Q8NDF8 | Q68ED3 | Q5XG87 |
| Q77MR9 | P10226 | Q6UDI9 | P36702 | P22996 | Q9RZE7 | Q9PHE9 | O51395 |
| P07621 | Q9ZK75 | P0A5R3 | O83295 | O51066 | O68891 | P75352 | P73077 |
| Q59189 | O54479 | F1MF21 | Q9ZP54 | Q08824 | Q9UGN5 | Q9SWB4 | P19071 |
| Q9HBE1 | P47236 | P15863 | P09084 | Q02962 | O43316 | P47237 | P26630 |
| P23759 | Q9PUK5 | P47242 | Q86U86 | Q6IR52 | P40426 | P0A4T6 | Q52154 |
| P57721 | Q0VCU0 | O23875 | A2YXQ1 | A2WM14 | Q8LT07 | A2XMN1 | A2WV68 |
| P39784 | P35227 | P40883 | Q9YFT8 | Q8ZTY0 | Q4JAI6 | Q9Y9V7 | Q00265 |
| Q8ZYL6 | Q5JFD3 | P57766 | Q9YEZ5 | P24314 | A0RXH7 | B9LU30 | Q8TWK3 |
| Q7T6Y0 | Q74MV1 | O10308 | P61074 | Q9HJQ0 | P52679 | Q09926 | O60035 |
| Q2YDC9 | P0ACM1 | P31368 | P31369 | Q24705 | P12383 | P33200 | Q06149 |
| Q8NS92 | P23801 | P32512 | P42195 | Q86TG7 | Q7TN75 | Q7M3K2 | P13975 |
| P41073 | P43459 | P0C961 | P0C962 | Q5HN74 | P31078 | Q97QZ2 | Q96BD5 |
| P06184 | Q17381 | Q64028 | Q8IXK0 | Q8NDX5 | P52698 | P36093 | O80805 |
| Q7RTV0 | P14309 | Q04621 | P16684 | P07269 | P07270 | Q05534 | Q57QC3 |
| P39769 | Q04449 | P34205 | P27526 | Q28811 | P12768 | Q55081 | P61496 |
| Q8N3S3 | Q9V9A8 | Q10328 | Q99453 | O75925 | Q6AZ28 | Q8N2W9 | Q94131 |
| Q80SX8 | Q9UUA2 | A6ZM04 | O80536 | Q570R7 | P10030 | Q8L5W8 | A6QPY8 |
| P79149 | P77170 | P52960 | P10036 | O93385 | Q99697 | O18400 | P20665 |
| Q96680 | Q64749 | Q8BG99 | O34381 | Q5YGP8 | P58195 | Q9N4H4 | Q60953 |
| P52168 | P51022 | P51023 | Q28466 | P31503 | P09086 | P20264 | Q29087 |
| Q63934 | O97552 | Q90270 | P31367 | P78424 | Q05587 | Q04088 | Q9P215 |
| P10266 | P63135 | Q01842 | P38485 | P03599 | P36341 | Q6XKE6 | Q9Y253 |
| Q9UNA4 | Q9UBT6 | O74944 | P94544 | P19560 | P25059 | Q89703 | P11204 |
| P03362 | P04586 | P18096 | P12894 | P11283 | P03354 | O92815 | A8WWH5 |
| P27536 | A9JTY4 | O13988 | P62597 | P31370 | P23757 | P23758 | O13852 |
| Q96QC0 | P37233 | O18971 | P07272 | Q52620 | O22785 | Q3UTQ7 | Q9H4Q4 |

---

|        |        |        |        |        |        |        |        |
|--------|--------|--------|--------|--------|--------|--------|--------|
| Q9GZV8 | P57071 | Q9HAZ2 | O23277 | Q13029 | Q80V63 | Q9NQX1 | Q9NQV8 |
| P03857 | P0A0C5 | Q5HJZ6 | P10025 | Q9HCU5 | P13925 | P22262 | Q9GLW0 |
| Q8AYI2 | Q28590 | P48785 | P48786 | O02334 | Q55BM5 | Q9VPH2 | P49643 |
| P20457 | Q45032 | P57220 | Q9PLE5 | Q9ZKE4 | P0A5A6 | P05445 | Q1RI08 |
| Q9WY22 | O83258 | A3N1H2 | P67674 | P49412 | A9LZQ2 | Q82XQ7 | P10277 |
| Q8FDB5 | P19782 | P15342 | Q64256 | Q3LU38 | P29617 | Q9U6A1 | Q92786 |
| P11826 | Q9IZT2 | Q7KWK5 | Q5Z8Q9 | O14283 | Q90963 | Q99811 | P62089 |
| Q06552 | Q06553 | B0Y6K1 | A7BJS7 | P08433 | P17502 | P0C230 | Q09838 |
| P35820 | Q5XXA9 | P37344 | Q7RTS3 | O04682 | Q9LZS0 | P35233 | P40193 |
| P72131 | O32138 | Q3UEB3 | Q00577 | Q8R4E6 | P37551 | A7MFD3 | Q9SKZ1 |
| P09546 | Q44333 | P0A9U6 | O42173 | P16146 | P11638 | P0A0N3 | P56260 |
| P10563 | P11637 | Q96B01 | Q9SW63 | Q9SK02 | O15315 | O35719 | Q54PJ7 |
| Q9LQQ2 | Q1ZXF0 | O55230 | Q9DG67 | Q9KC68 | Q65DU9 | Q5KVB2 | P76062 |
| P53709 | O59753 | P28519 | P36617 | P48581 | Q75EN0 | Q5A4N5 | Q6BLM3 |
| Q9QXK2 | P33288 | O74747 | Q6CHI1 | P06777 | Q00578 | Q5T890 | P40352 |
| P14736 | P36601 | B3MMA5 | A4PBL4 | P32863 | Q4WVM1 | P0CQ67 | Q6BIP2 |
| Q7S1P9 | P36607 | Q4PGG5 | Q6C2R8 | O58001 | Q5JET4 | P74391 | B0R636 |
| P43465 | Q90523 | Q91187 | O54452 | Q39204 | Q96TL7 | P11938 | Q8LC30 |
| P42736 | Q8H1E4 | Q7G1L2 | Q7VKV0 | P18515 | P03050 | Q91392 | A2T928 |
| Q9C6P5 | Q9C688 | Q9FG68 | Q9M2Y9 | P73123 | Q00312 | Q24472 | Q08999 |
| Q92804 | Q9K6K2 | P07760 | P06400 | Q01473 | P18754 | Q13YL3 | Q2RNI6 |
| P03036 | Q37907 | P18679 | P09964 | P20098 | P69409 | Q47588 | Q09772 |
| Q9LUJ3 | Q8NG50 | O13862 | Q4I0C5 | P25611 | P19541 | Q05950 | Q9P6H9 |
| P40379 | Q9ZUP2 | Q3EAS6 | Q39199 | Q75JL2 | Q08784 | Q02347 | P0A5U5 |
| Q9F407 | Q59592 | O86382 | Q54428 | P65982 | B7GUX7 | P49997 | A0ZZA1 |
| Q3A8P5 | B0T360 | Q5L648 | Q48AS5 | Q11NR3 | C1CW06 | B0U178 | Q2SQZ4 |
| A0L3I9 | Q1DFP6 | Q3JF36 | B1ZSD3 | Q3A8M6 | A4SC23 | Q4UNG8 | Q2S6G1 |
| C5BKM1 | O83049 | Q83NZ4 | Q8PRG0 | O51528 | Q8XD86 | Q9ZJA1 | O69460 |
| O50224 | O32044 | Q5SJ47 | P46063 | P73421 | P50729 | P33228 | P39792 |
| P14199 | Q9V2M0 | Q9V2K6 | Q9V2D7 | O58782 | Q9V0Y9 | Q9UY16 | Q01751 |
| P13870 | P68922 | Q9T1U3 | Q02582 | P0C079 | Q01201 | O50461 | O33347 |
| P65067 | P64528 | Q04864 | P0DH85 | P0CAP4 | P0CAP5 | O23076 | Q8RYD1 |

---

|        |        |        |        |        |        |        |        |
|--------|--------|--------|--------|--------|--------|--------|--------|
| Q9XIB5 | Q84J39 | Q8LAV5 | Q9M8K2 | Q9LXE1 | Q9SB79 | Q9SB80 | O81782 |
| Q8H2D1 | Q8S8E8 | F4IQL7 | F4KFT6 | O54003 | Q52221 | P18921 | P20044 |
| P03568 | Q00338 | Q934T6 | P31617 | P05683 | P03856 | P60470 | Q9BWE0 |
| Q9RMZ4 | P15419 | O80302 | P03660 | Q38617 | P18016 | Q9IG45 | Q80GM6 |
| Q47274 | P76161 | P33520 | P41412 | A3EWL3 | Q4KWZ7 | O94623 | P12689 |
| Q9RVT3 | Q7UW59 | Q9WX14 | Q8VUP4 | O97472 | Q23696 | Q8VEE4 | Q92372 |
| Q9ZQ19 | Q8LFJ8 | P0AFW1 | P46358 | P35600 | P35251 | O60182 | P38630 |
| P38629 | O94449 | O94697 | P34348 | P48743 | A0JMF8 | A2BGA0 | Q9JL61 |
| Q2KHR2 | D3YU81 | O00287 | Q9Z205 | O32237 | Q00453 | Q750N3 | Q6FLP2 |
| C5DGQ7 | A7TE38 | B3LR49 | C5E4G1 | Q9YC75 | Q97ZF5 | Q58907 | O58530 |
| A7FN79 | Q6DA22 | P0C7M4 | P81128 | O81242 | P54292 | P77732 | Q63630 |
| Q10445 | P87235 | Q9Z3Q6 | Q8NHV9 | P32445 | Q03182 | Q6NI56 | Q8FQS2 |
| Q9FGD1 | Q9LVU8 | O81791 | E0TZF9 | Q12224 | P32338 | Q10160 | Q02685 |
| Q5ZM20 | P03049 | Q9LBW6 | P04487 | Q8N5U6 | Q9QZS2 | Q9HSF6 | F9VN79 |
| Q99020 | P0ACI1 | A2ZAI7 | Q7Y0V7 | P38022 | B1JS04 | O34857 | Q0J235 |
| P51448 | Q92753 | P51449 | Q9SJK6 | P10181 | P25042 | P62182 | P03048 |
| P06227 | P62177 | P24219 | P38944 | Q01194 | O83149 | P04524 | P30333 |
| P52434 | Q92399 | P20436 | Q80TE0 | P17546 | P11414 | P28364 | Q6GZW7 |
| A5DCV3 | P14248 | P08707 | P16117 | Q37906 | P51704 | P18680 | P06019 |
| P03041 | P03034 | P21678 | P03043 | P11189 | P17890 | P15238 | P04132 |
| P08979 | P39956 | P23250 | P0ACS8 | P52323 | Q9Z7F0 | Q9ZMY3 | P0A603 |
| P17531 | Q2K619 | P43344 | P74565 | O68887 | P37970 | Q9KI19 | O51804 |
| P06574 | P19433 | P66810 | P10726 | P19940 | P02964 | Q06198 | P12254 |
| P26768 | Q3UH06 | P33395 | P38766 | P40992 | Q9S7B2 | P38781 | Q06639 |
| Q9P7W8 | P46974 | P39650 | P78871 | O34419 | O85264 | Q9P7D9 | Q05543 |
| Q2UMB1 | Q6CQ86 | A5E4Y7 | Q6CHJ8 | Q8TUS2 | P38035 | A8WS58 | B4L1Z2 |
| A2AQ19 | Q9UUI6 | P32607 | P38165 | E0TY12 | P40962 | Q6PF39 | Q9XSB7 |
| Q08775 | Q9Z2J9 | Q8X4Z7 | P70827 | Q5L6Z3 | C0QKP5 | B2KCD9 | Q8REJ7 |
| Q04RG9 | Q2SS60 | Q7NAN2 | Q4A7W5 | P75243 | B2A5L5 | Q2GDJ1 | A9BIJ5 |
| A2C1Y5 | A9B9X1 | Q7V7T9 | Q7USB0 | O83554 | B1H0B1 | B1AJ90 | Q9PVY0 |
| P51128 | Q5TJF7 | Q9W2Q1 | O97039 | Q7SYB3 | Q5EG55 | Q7XLX6 | P42554 |
| Q9FMF4 | Q80YR5 | P55109 | P48383 | Q9Y467 | Q8BX22 | P39806 | P40847 |

|        |        |        |        |        |        |        |        |
|--------|--------|--------|--------|--------|--------|--------|--------|
| Q2FJ20 | P82979 | Q2FEJ8 | P0C0R2 | Q2G1T7 | Q2FVY9 | Q2FIX1 | Q2FEB2 |
| P10571 | Q60611 | Q0K846 | P19601 | P30052 | Q25214 | O14335 | P37076 |
| P74892 | P24508 | Q9BWW7 | P15859 | Q64124 | P24349 | P34706 | O32242 |
| Q8JJ26 | Q9HB31 | P70368 | P87164 | P21344 | O43058 | Q65U90 | A1STA5 |
| Q09415 | Q9Y6X0 | Q9BYW2 | Q53H47 | O14229 | Q9UST7 | O74458 | O60174 |
| P20134 | P32432 | P23246 | A7ZHN7 | C0SP86 | P56644 | P39361 | Q17241 |
| O60902 | O35750 | O15266 | Q91848 | O22056 | O24621 | Q9ZSL6 | Q9ZNX9 |
| O31654 | A1TEV0 | O07582 | O53590 | A7X3L7 | O05404 | Q45585 | P35165 |
| O05409 | P81133 | Q14190 | Q24167 | P22753 | P37459 | P46954 | O82802 |
| P11978 | Q8Z4A6 | Q9AWB2 | P25294 | Q62233 | Q9UIU6 | Q8N196 | O93307 |
| P35207 | P34707 | P38889 | Q02100 | Q4QLV2 | P22807 | P32030 | P32031 |
| Q6D5V7 | P45897 | Q9I8V2 | Q1HE26 | O43541 | P38935 | Q29L50 | Q9MA17 |
| P51531 | Q969G3 | Q56A18 | O66878 | P51834 | Q8KBS6 | B9E1H0 | Q81ZL2 |
| Q8REH4 | B8CW13 | Q1INB1 | Q88WJ9 | P47540 | P41508 | Q10970 | Q8TZY2 |
| Q6N1B7 | P73340 | C4ZJU1 | Q9HK21 | P32566 | Q26600 | Q26601 | Q26602 |
| Q26604 | Q26605 | P38128 | Q08142 | P76053 | E1B7X9 | G5EDG2 | Q9VL72 |
| P30340 | Q6P5C5 | Q9YGN6 | Q8NB12 | Q3KNW1 | P08044 | Q8K0S9 | Q5E9M5 |
| Q8BP86 | P25357 | Q9VQS7 | P53438 | Q5JUK2 | Q6IUP1 | Q9NX45 | Q9D489 |
| Q9QX47 | P62559 | P37078 | Q8R2Y9 | Q9VM17 | P35716 | Q8AXQ4 | Q9UN79 |
| P40657 | O60248 | Q62247 | Q61473 | Q9W7R5 | Q8CGW4 | P41225 | Q06945 |
| Q7YRJ7 | Q51506 | P0A9E4 | Q27350 | P52933 | P58253 | P52937 | Q9N1Q6 |
| Q9N1Q5 | O35892 | Q9HB58 | Q3KRF1 | Q01714 | Q5E9U0 | Q9HAJ7 | P15281 |
| Q6BEB4 | Q3SY56 | Q5XGT8 | Q86W54 | Q700C7 | O95238 | P80304 | P17433 |
| Q9Y657 | Q75GR5 | Q8S9L0 | Q653Z5 | Q6Z461 | Q7EXZ2 | A2YX04 | Q0J0K1 |
| Q9LGU7 | Q9S840 | Q0JGI1 | Q6H509 | Q0E3F8 | Q94JW8 | Q75LH6 | Q8S9G8 |
| Q8GXL3 | Q01KM7 | Q700W2 | Q6I576 | Q9M4A2 | Q22236 | Q8SVS9 | Q9Y5K1 |
| P23179 | Q9M4A1 | Q17768 | O17582 | P06843 | O13472 | Q9FUA4 | P24417 |
| Q6AXY9 | O97676 | Q6ZRS2 | P09007 | Q92259 | Q54TY7 | Q54RY6 | Q55F37 |
| Q90718 | Q24535 | P11831 | P15082 | Q9R9U0 | P52172 | Q52KI8 | Q10213 |
| P07665 | P15619 | P07664 | Q03256 | Q05738 | P36394 | P36395 | Q83NU2 |
| Q8KAM2 | Q8ZSD2 | Q82CI4 | P66857 | Q84J78 | Q9CYR0 | P60471 | P28042 |
| O66475 | O51141 | Q38504 | Q823K0 | P59927 | Q9RY51 | Q890K1 | Q72UU3 |

---

|        |        |        |        |        |        |        |        |
|--------|--------|--------|--------|--------|--------|--------|--------|
| P75542 | Q98PV9 | Q8EA81 | Q8CNK0 | O83101 | Q9PPT7 | Q9NEL2 | P37549 |
| P29840 | O14470 | Q05153 | Q293F6 | P11020 | Q9TUZ1 | Q61AP6 | Q9WVL2 |
| Q6DV79 | P42226 | O00910 | Q20977 | Q54BD4 | Q7QDU4 | Q24151 | P50104 |
| P26047 | P40798 | Q870J1 | P36631 | Q08400 | P13574 | P39015 | Q9LMK5 |
| Q0E7J7 | Q6ZVD7 | P17305 | B3LFK1 | P38704 | Q7M2P1 | O97965 | Q09821 |
| P32579 | P54000 | P33181 | P08970 | P28159 | Q9Y1T5 | P31266 | Q00492 |
| Q38895 | O75683 | P20193 | Q9C5P1 | P25172 | Q6NVH7 | Q8VCI7 | Q06182 |
| Q8W475 | Q84JG2 | Q9XI07 | Q8VY05 | P25302 | P08153 | P40418 | P09959 |
| Q6FK48 | P0CO19 | Q7S133 | O13682 | Q6CA87 | Q60563 | Q03410 | Q9BX26 |
| F4IHS2 | P55733 | Q08812 | Q00840 | Q05309 | O35003 | P10486 | Q47281 |
| Q60295 | P08956 | P17224 | P75431 | P10485 | Q57594 | P19704 | P75604 |
| P75279 | P75416 | P06991 | P75435 | P44152 | Q60296 | P71344 | P17222 |
| P75487 | P75488 | P59697 | P12249 | P14506 | Q54KJ8 | Q9D902 | P79011 |
| Q9SU25 | Q54WV4 | Q05913 | O94416 | Q54KT7 | P41900 | O94424 | P41896 |
| P71366 | P08763 | P12364 | P40814 | P11901 | Q55566 | Q45620 | P16942 |
| Q00461 | Q00462 | P24607 | P35878 | Q5ZJF3 | Q7KSD8 | Q9ATB4 | Q8I8V0 |
| Q5ZLN5 | P97357 | A8XLS0 | F1R3W0 | B8AX23 | F7BLM1 | Q15572 | Q9D4V4 |
| P51123 | Q80UV9 | Q99142 | Q92750 | Q90YI8 | O73823 | Q16559 | Q8T0D4 |
| O16867 | P03409 | P79005 | Q93WI2 | P52653 | Q9LL45 | P26356 | A7UFC2 |
| Q5UQP9 | P26354 | P32085 | O74045 | Q27850 | P13393 | Q9NL40 | Q16650 |
| O75333 | Q20257 | P90971 | O02073 | O43435 | P70323 | Q9UMR3 | Q9UL17 |
| Q9N2K7 | Q9TZL0 | O61764 | O45291 | Q09376 | Q23622 | Q9U2C9 | Q9NA56 |
| O15119 | Q22813 | Q861Q9 | P79779 | E1BEA8 | Q8JIS6 | A1YF56 | Q66JL1 |
| Q22292 | P03934 | P34257 | Q9F4G3 | Q2KI09 | Q9EPQ8 | Q7RTU0 | Q8T2A4 |
| Q9UL49 | Q9HEQ9 | P39885 | O82277 | A0AQW4 | Q9S7W5 | Q93Z00 | Q9C9L2 |
| Q9LEZ9 | A1YKT1 | Q9LT89 | Q9FYG7 | Q9C7G4 | Q93V43 | Q8LPR5 | Q94045 |
| P53999 | Q872F4 | P87294 | Q9FME3 | Q9C518 | O64647 | A5F384 | O07776 |
| P11866 | O87940 | Q94818 | Q94819 | Q15562 | P29549 | P29548 | Q06183 |
| P18412 | P97516 | P07387 | P53038 | Q9D7K2 | P54274 | Q9PU53 | O35144 |
| P11455 | Q9SPU7 | O14746 | Q8LKW0 | O13339 | O77448 | Q06163 | Q8NFU7 |
| P28816 | P03039 | Q5ZAY0 | Q9UNN4 | Q8IUE0 | Q9UTL5 | P03001 | P39933 |
| Q9Y5Q9 | Q9UKN8 | Q54GS8 | Q8R2T8 | P98152 | Q9NQB0 | Q924A0 | Q0II87 |

---

|        |        |        |        |        |        |        |        |
|--------|--------|--------|--------|--------|--------|--------|--------|
| Q8WVM0 | P32367 | P34111 | P33339 | Q12415 | Q12308 | Q22703 | Q14188 |
| Q46M57 | P42427 | P19532 | P19484 | Q9YAD5 | O29501 | A8M8Z5 | A0RYF4 |
| A8ABJ9 | Q8TY11 | A2SQM6 | Q2NEV4 | Q8ZYH0 | Q8U3H5 | A3DN07 | C3MZJ0 |
| P49373 | P07273 | O27001 | P14233 | Q15583 | P70284 | Q9GZN2 | O43952 |
| Q39117 | Q9SDW0 | B0R9H2 | Q5NVM3 | Q98867 | B5XCB8 | Q9H0W7 | Q0P5B4 |
| Q5ZHN5 | Q0IHI7 | Q8TBB0 | Q9BT49 | Q9H5L6 | Q9PUA8 | Q9W6I9 | O97716 |
| P18119 | P10828 | Q28571 | P43462 | P38141 | O94278 | Q96FV9 | P59924 |
| Q4W5G0 | Q6B0B8 | Q8BUZ3 | G3MY25 | Q6NT04 | Q39127 | P22711 | Q9U3V5 |
| Q805B4 | P47974 | P23949 | P97273 | P14083 | P18102 | P43345 | P82094 |
| Q641M3 | Q4V7N7 | Q46731 | P21580 | P08504 | Q45119 | Q06126 | P20189 |
| P04130 | Q45666 | P13988 | P13989 | P13991 | P05845 | P34219 | Q9LVG2 |
| Q7T6X9 | Q969P6 | Q5UQB5 | Q9PHK2 | O66893 | P30181 | O28469 | P40114 |
| O51768 | P93119 | Q54RC3 | P30189 | Q9ZMV7 | Q59046 | Q9JN65 | O73954 |
| P07799 | Q9X909 | Q9HM08 | P41511 | P41512 | Q9PEV8 | Q9X3X7 | O42131 |
| P90520 | Q00942 | P27570 | Q9QSK1 | Q9NG98 | O70157 | O96651 | A0R979 |
| Q8T2T7 | P14294 | P13099 | P07065 | Q8TQF8 | A2XFC1 | Q9YE64 | B0R4D3 |
| Q58434 | B8BDQ4 | Q8U0K8 | Q92547 | P09176 | P23992 | Q2EES9 | P53147 |
| O94842 | O74205 | P15795 | O94900 | Q8N7U7 | O14246 | P15533 | P35883 |
| Q04222 | Q45968 | P08770 | P60231 | P03009 | Q51761 | Q54513 | P35884 |
| P80011 | P18416 | P37247 | P35881 | Q45618 | P37248 | P59800 | Q6ZDF3 |
| Q00184 | P14565 | P17909 | P33785 | P10026 | P33788 | P0CK38 | Q06924 |
| P55407 | Q46087 | P06627 | P12059 | P07636 | P35879 | O05069 | Q8VWK4 |
| Q8BXJ2 | P39796 | P36673 | P05476 | P07676 | P02788 | Q27896 | Q24119 |
| Q6E2N3 | Q8L7L8 | Q9FFY9 | Q9M347 | B6EGC9 | Q822W7 | B0B9S0 | C6DF27 |
| P58700 | Q9UHF7 | Q24742 | Q8GV05 | B3DJM5 | P22265 | Q9P7V3 | Q99598 |
| Q9FJA2 | Q9FT81 | Q8XBK9 | Q15361 | Q9UNY4 | Q93PU7 | P42282 | P17789 |
| P70785 | A7FHW9 | O96642 | Q11094 | Q9GNV2 | Q8MIH8 | P42681 | P33122 |
| P44694 | P25490 | Q6AUG0 | P49413 | P25976 | P0CB48 | Q9NZI7 | Q4G0F8 |
| Q23946 | P83949 | P26370 | P0AGA8 | P0ACT8 | A7ZV62 | Q8GZA8 | P39001 |
| Q93705 | P29506 | Q50D79 | O77215 | A8WL06 | Q9N5D6 | P13528 | Q19203 |
| O22768 | P21968 | Q86B79 | Q28ZA9 | P40349 | Q04411 | P32326 | Q15853 |
| Q9VPQ6 | P20153 | Q12132 | P18957 | Q9Z985 | Q46577 | P29927 | P28009 |

---

|        |        |        |        |        |        |        |        |
|--------|--------|--------|--------|--------|--------|--------|--------|
| P25735 | Q08518 | Q9CD72 | P53528 | P75437 | Q9ZD95 | P66798 | P44487 |
| P23541 | Q623D4 | Q93899 | Q8W4L5 | Q47744 | Q57475 | Q57534 | Q57120 |
| A0QRY6 | Q46560 | P21681 | Q46561 | P17255 | Q8TUT0 | Q2NKI2 | P03698 |
| P07695 | P11107 | P12551 | Q9PTN2 | P06455 | P36720 | Q02513 | P08345 |
| P36784 | P27552 | P27223 | P36798 | P06931 | Q8BDG7 | Q89808 | P03127 |
| P36806 | P50775 | P36808 | P27555 | P30734 | P30735 | P22159 | P06933 |
| Q705F5 | P03130 | P27556 | P03131 | P87377 | O95231 | Q9W769 | Q14119 |
| P03006 | P14815 | P17311 | P14816 | P13342 | Q05286 | P06023 | O05070 |
| P07928 | Q26366 | O21945 | P20313 | P68742 | P40522 | P40041 | Q9C2N1 |
| P19893 | P24647 | P32511 | Q9FIE3 | P0A247 | P08062 | P0A2T2 | P62722 |
| P37398 | Q2YJ50 | P08342 | Q8BDG3 | Q80905 | P27558 | P27235 | Q80932 |
| P22856 | P23848 | Q04580 | P22808 | Q9SLB9 | Q9T1U6 | P17637 | P30020 |
| Q77MR5 | P06492 | P09265 | P17638 | P24849 | P03098 | P04011 | Q3L6L8 |
| P20224 | P36322 | P16790 | P52439 | P03763 | P96343 | P06022 | P71388 |
| P25476 | P08557 | P71389 | P08558 | Q9I1P2 | P03690 | P03691 | P22562 |
| P03688 | P14327 | P22625 | Q00572 | Q02123 | Q01687 | P16654 | O42477 |
| Q9T1Q8 | P20710 | O22002 | Q05244 | P04889 | P05998 | O22010 | P75970 |
| Q03631 | Q54F46 | P41846 | Q01371 | O75717 | Q84LH3 | P71592 | Q6MX01 |
| B2GH83 | Q8G5J9 | O05847 | Q8G5K1 | Q7TWJ2 | O69649 | P96215 | A0QTT1 |
| Q7AKN0 | Q7AKI9 | B2LXS7 | Q9LL85 | Q9XI33 | Q5AP80 | Q5ANB1 | A3B6V0 |
| A3BKM2 | Q9LM84 | Q7XM13 | Q6X7K0 | A2XZR3 | Q6S3I3 | Q9SIB4 | A2ZH47 |
| Q8H1D2 | A2WWU7 | Q9ZVF5 | A2XG77 | Q0JKK6 | Q6X7J5 | Q5QMM3 | Q6X7J4 |
| Q6X5Y6 | P40151 | Q9LG05 | Q9SV15 | Q9SVB7 | Q9SA80 | O22176 | Q9FL92 |
| Q9SZ67 | Q93WV0 | O04609 | O22900 | Q9C5T3 | Q9FLX8 | Q9SUS1 | Q9FL62 |
| P59583 | Q8S8P5 | O65590 | Q9CAR4 | Q9SR07 | Q8GY11 | Q9ZUU0 | Q9S763 |
| Q9ZSI7 | Q9FGZ4 | Q9FHR7 | Q8VWQ5 | Q9FH83 | Q9SUP6 | Q93WU8 | Q9SHB5 |
| Q9C983 | Q93WU7 | Q9SJ09 | Q8VWV6 | Q9LP56 | Q93WV7 | Q93WV6 | Q93WV5 |
| Q9LXG8 | Q9FYA2 | Q9SI37 | Q554C5 | Q9FG77 | Q9XI90 | Q9C519 | Q9STX0 |
| Q9C9F0 | Q19546 | O93530 | P50902 | P49953 | P36219 | Q9SB92 | Q8LL11 |
| O35426 | P40489 | Q8XTL6 | O26979 | B3DQV1 | B3QM22 | C4ZGY6 | Q8KRZ2 |
| C3PLU8 | Q8KUV2 | A8F7B4 | Q8RA66 | Q9PQS0 | Q9CG32 | Q5M1I1 | Q8U9U6 |
| O31490 | P22876 | P39781 | A1C7P9 | P28518 | Q24595 | Q01831 | Q4JC68 |

---

---

|        |        |        |        |        |        |        |        |
|--------|--------|--------|--------|--------|--------|--------|--------|
| Q9LK15 | Q54PN5 | Q24087 | Q682D3 | Q9FKM5 | Q9CXE6 | Q54LY5 | P13010 |
| P23789 | P97789 | P16557 | Q44406 | P21940 | P06519 | P27159 | Q05092 |
| O53626 | Q60328 | P67705 | P67737 | Q8NYT6 | Q54UV8 | Q60386 | Q6GKL1 |
| P44978 | P47347 | Q9SX41 | Q7XFU9 | P45008 | Q5N6V0 | F4I8U3 | Q7XGM6 |
| Q8CSL5 | Q58520 | Q53N90 | Q2NF79 | Q53QI0 | Q2R9D2 | Q92GC8 | Q9ZU26 |
| Q2QMT7 | Q2QMT2 | Q8S2E6 | Q5JNA1 | Q11063 | C4KH08 | O27346 | P67159 |
| Q58721 | Q0JP99 | P67434 | Q9HIH6 | P0A0Z0 | P68913 | Q58793 | Q83BT6 |
| P44540 | P45215 | Q9XIB4 | P44207 | Q74NA9 | P72979 | A6USD6 | Q58940 |
| P67436 | Q58958 | Q5RM09 | Q9MA32 | O28646 | Q8ZWT6 | Q59029 | Q9FX77 |
| O05086 | A0RYF8 | Q9SYL8 | O28487 | P67438 | P67669 | P67671 | P44558 |
| P26833 | Q97MK5 | O53647 | P67665 | A3A463 | P62087 | O33060 | Q9SIC7 |
| Q9SIC3 | Q5JHH2 | Q7A3W9 | Q8RV83 | Q6DSS2 | Q9SJ07 | Q8IRH5 | P44580 |
| Q1G3B8 | P67667 | Q57682 | P37371 | O23659 | Q9KPI4 | Q9SJ98 | Q6K3B1 |
| O66625 | Q9XIP5 | Q7JUR5 | Q6EU30 | Q10809 | P67747 | P67440 | Q6K5K2 |
| Q01856 | P0A648 | Q10Q26 | Q851V1 | Q10GP0 | Q851W4 | Q851V5 | Q10GM4 |
| P67442 | P75438 | Q9SZ05 | Q60275 | Q57807 | Q1PES7 | Q57809 | B7EIH2 |
| O53712 | P44675 | Q3V4U8 | Q10QS9 | Q84R27 | Q54B29 | Q87K77 | Q3V4S9 |
| Q05954 | B3H469 | Q9SY12 | Q9ZR15 | O33682 | Q9SB61 | Q7XS74 | Q3V4R9 |
| Q04310 | O53750 | O53757 | O53759 | Q7F9W2 | Q7XLP4 | O05023 | P67739 |
| P55360 | P55373 | P55389 | P55409 | P55449 | P55559 | P55565 | P55576 |
| P55613 | P55615 | P55626 | P55629 | P55643 | P50337 | P55658 | Q53198 |
| P55729 | Q8VKK5 | Q8DET1 | Q9LST3 | Q5JF28 | Q3E7N5 | Q680D9 | Q6L4H4 |
| Q9FNI3 | Q3E922 | Q57988 | F4KIX1 | Q9FHH1 | Q5KQI4 | Q9FFX1 | Q58006 |
| O66861 | Q5VS55 | Q9LHY9 | O86029 | Q67VL7 | Q9RMY4 | Q9Z9W1 | P44030 |
| Q8T053 | Q057E0 | Q55963 | Q84YL3 | Q5UP03 | Q58161 | Q0D5G4 | Q9ZCH6 |
| P67432 | Q58184 | P44876 | Q9YDZ1 | Q8H507 | Q8H506 | A3BH91 | Q8EUW6 |
| Q6Z0D2 | Q6YTD4 | Q6Z0D9 | Q55433 | P81315 | Q10550 | P44923 | Q1ZXA9 |
| Q58352 | Q58371 | P12552 | O13527 | Q9XFB1 | Q9LDT3 | Q8GW46 | Q76EJ0 |
| Q47156 | Q47149 | P21514 | P77700 | P23823 | P23822 | Q10086 | G2TRN9 |
| P19880 | P24813 | P38749 | P40917 | Q03935 | Q08182 | Q06596 | P46117 |
| Q10186 | O31417 | P0A9T7 | P32788 | P77634 | O31432 | P77746 | P30979 |
| O31449 | P39901 | O31456 | O31459 | P0ACU0 | P75811 | Q10332 | C0H3S9 |

---

---

|        |        |        |        |        |        |        |        |
|--------|--------|--------|--------|--------|--------|--------|--------|
| P42239 | P70955 | O34464 | P51342 | Q1XDE4 | P49536 | P51237 | O94720 |
| P94387 | P43461 | P76034 | P77615 | P94423 | P94433 | O59830 | Q08792 |
| P25279 | P96625 | P77171 | P77626 | P67700 | P96660 | P96662 | P96663 |
| P96673 | P96676 | P96683 | P0ACM3 | P96690 | P96701 | P96705 | P96708 |
| P0ACR3 | O05494 | P77402 | P77721 | P39961 | P76241 | P76369 | O35034 |
| P0ACM7 | P0ACR6 | P0A9F0 | P25992 | O31517 | O31522 | O31541 | O13706 |
| P45785 | O31497 | Q7WY76 | O14130 | P0ACR7 | Q48660 | P37767 | P33634 |
| O31560 | O31564 | P52133 | O06474 | P53243 | Q99315 | O60056 | P77295 |
| P58664 | Q46802 | P52044 | Q9Y7K9 | O13535 | O60130 | O60131 | P67661 |
| O31592 | P54590 | Q9P6I9 | P32398 | P30791 | P37640 | P37641 | Q796S4 |
| Q04013 | Q04116 | Q9HE16 | G2TRT1 | P37671 | P37682 | P96194 | P31449 |
| A8ACM1 | P31475 | P0ACN0 | P32144 | P32677 | P10427 | P32425 | P40331 |
| Q9P7H9 | C0H3Y4 | P47024 | O74915 | P16694 | P0ACU8 | P39334 | P39360 |
| P39376 | P39389 | P39399 | P0ADD8 | P77601 | P77379 | Q95QY7 | Q9HDX1 |
| P34303 | O34827 | O31679 | O31690 | Q12244 | Q5UPI1 | Q11101 | Q05854 |
| Q9UTA7 | Q9UTA1 | O07627 | O33812 | O94392 | P34447 | P14707 | P34454 |
| O31761 | Q03615 | O59741 | O59744 | P53749 | P34536 | Q8X7R5 | P77309 |
| P77559 | P45968 | P42547 | P34670 | O34701 | O34647 | O34901 | O34892 |
| O34844 | O35009 | O74308 | O32006 | O34791 | O34336 | O34766 | O34449 |
| P40923 | P34161 | P34664 | O31834 | Q8FFE0 | P77396 | Q8ILR9 | P54182 |
| O07127 | P50831 | Q09452 | P45902 | P45904 | Q46942 | Q46855 | P54529 |
| Q5UPI0 | Q5URB4 | Q5UQS2 | Q5UQA4 | Q5UQQ9 | Q755R9 | B3LQP5 | O07906 |
| Q12172 | Q8WTZ3 | P14307 | P97247 | Q10127 | O34533 | O32071 | P0ACN2 |
| O35038 | O34712 | O34970 | P70790 | Q9JMT8 | O05236 | O05261 | O32181 |
| C0H3Q8 | O32228 | O32238 | O34709 | O06978 | O06987 | O07001 | O07019 |
| P40762 | O34692 | O32235 | P25150 | P39601 | P70993 | P71036 | P94578 |
| O05217 | Q10938 | C0H3S6 | P42103 | P46330 | P55181 | P37510 | P37503 |
| P37486 | Q45591 | O66401 | Q86YH2 | Q6N043 | P0CG31 | Q96PM9 | Q96KM6 |
| B2RRE4 | Q6GNP2 | Q4V348 | A8MWA4 | P47043 | Q0IH98 | O96006 | D2EAC2 |
| Q96DT7 | Q9WTY8 | O95625 | Q9Y330 | Q05516 | Q90625 | Q13105 | Q9HC78 |
| Q5TJE2 | Q80X44 | A1YEX3 | Q9HCK0 | Q5TC79 | Q5EXX3 | O15060 | Q9NUA8 |
| B2RXF5 | O43298 | Q8NCP5 | Q8R0A2 | Q9UFB7 | P10074 | Q6ZSB9 | O95365 |

---

|                           |        |        |        |        |        |         |        |
|---------------------------|--------|--------|--------|--------|--------|---------|--------|
| Q8NAP8                    | Q9Y2K1 | Q8N680 | Q9H5J0 | O15062 | Q0V8G8 | Q96C00  | Q84JE8 |
| P09090                    | Q24648 | P15822 | P31629 | Q24762 | Q6PGE4 | Q9NPA5  | Q9NTW7 |
| P28166                    | P28167 | Q9C0A1 | Q61329 | Q42430 | Q8NHY6 | P10078  | Q8N8Y5 |
| Q9NU63                    | Q8C6P8 | Q62396 | Q6PCR6 | P80944 | P18712 | P18715  | P18723 |
| P0C6A0                    | Q1WG82 | Q7PYU6 | Q8N5A5 | A1YF22 | Q80VX4 | Q9H4I2  | Q55940 |
| Q61467                    | Q96T25 | Q9NZV7 | Q10424 | Q6CR69 | A7TPF8 | A6ZTU2  | Q63HK3 |
| Q9P0L1                    | Q5H9K5 | Q3V0C1 | Q28EG9 | Q0VD35 | Q15326 | Q8NC26  | P38621 |
| P52741                    | P52743 | P52744 | P52746 | A0MS83 | Q15697 | O14628  | O14709 |
| O95201                    | Q5R8K4 | Q9UDV6 | Q9UL58 | Q9P2Y4 | Q9UL36 | Q1L8W0  | Q16600 |
| P15620                    | Q96GC6 | Q9NSD4 | Q8N554 | Q9Y2X9 | Q9UDV7 | Q9EQB9  | O60281 |
| Q9NR11                    | Q5JNZ3 | Q9P2F9 | Q8BZ89 | Q5BKZ1 | A2RV70 | Q96JL9  | Q9H4Z2 |
| Q9BYN7                    | Q6P1L6 | Q9GZX5 | Q9NW07 | Q8N895 | Q7RTV3 | Q9EQJ4  | Q9UJN7 |
| Q8TD17                    | Q9C0G0 | Q9H9D4 | Q86VK4 | Q96IQ9 | Q09FC8 | A1L1R6  | A1Z9R4 |
| Q7Z4V0                    | Q8N0Y2 | P59923 | Q9NWS9 | Q9Y4E5 | Q96JM2 | Q7Z7K2  | Q96JG9 |
| B1APH4                    | Q96MN9 | Q9ULM2 | Q96IT1 | O60304 | Q8TCN5 | Q7ZZ00  | Q8NB15 |
| A4FV61                    | Q8N8E2 | Q92618 | Q96C55 | A6QR00 | Q9HCE3 | Q6NXXK2 | Q8K083 |
| Q96MR9                    | Q32KN0 | Q8BY46 | Q86XF7 | Q9H609 | Q9BSK1 | Q8NAF0  | Q9UK33 |
| Q86UQ0                    | Q92610 | O00488 | Q96LX8 | Q8N2I2 | Q6ZSS3 | Q96I27  | Q5EBL2 |
| Q14966                    | A5PK30 | Q96N77 | Q9H582 | Q5T619 | Q96CK0 | Q8IZM8  | Q8N720 |
| Q8NDT4                    | Q2TA17 | Q96BR6 | Q8IZ20 | P0C7X2 | Q96CS4 | Q5VV52  | Q3TDE8 |
| Q9H7X3                    | Q569E7 | Q96C28 | Q3U288 | Q8NE65 | Q3U133 | Q96N20  | P51815 |
| Q8R0T2                    | Q8BIQ8 | Q7L3S4 | Q8BI73 | Q8N8C0 | Q6ZMS7 | Q8NCA9  | Q8N393 |
| Q6ZN11                    | Q2TB10 | Q6ZRF7 | Q6PD05 | Q17R98 | Q9Y2P0 | Q96EG3  | Q08AG5 |
| P0CJ78                    | Q810A1 | Q9ERU3 | P17041 | Q96MX3 | Q15929 | Q16587  | P51502 |
| P17098                    | Q05481 | A8MXY4 | P0ACS6 | P18739 | P18745 | P18748  | P18743 |
| P18751                    | P18752 | P18853 | F8DT24 | Q3URR7 | A1YEP8 | Q8TBC5  | P17040 |
| Q6NSZ9                    | Q8IWY8 | Q9NX65 | Q80VJ6 | Q8NAM6 | P34450 | Q9Y7I8  | P54479 |
| O05839                    |        |        |        |        |        |         |        |
| 5321 non-binding proteins |        |        |        |        |        |         |        |
| B4IBI9                    | Q86YV6 | Q9UUG3 | O31959 | P27096 | Q09931 | A3PSL5  | P14534 |
| O29714                    | B1HNY1 | Q92338 | Q4JBF2 | P50110 | Q5CKJ0 | O31983  | Q6PL45 |

---

|        |        |        |        |        |        |        |        |
|--------|--------|--------|--------|--------|--------|--------|--------|
| O32037 | O42895 | O44662 | Q12019 | Q2V3B2 | P46666 | Q9LD55 | O53475 |
| Q9NZY2 | P0A462 | A4X915 | P50080 | Q7YR70 | Q96KT0 | Q55E44 | P75711 |
| Q98DV6 | Q18801 | O31696 | P22536 | P46315 | Q9EXU9 | Q5UR09 | Q5UR15 |
| Q06412 | Q8RVQ5 | P32285 | Q65CC7 | Q57787 | Q0P427 | Q58DE2 | Q750S5 |
| P48447 | P54608 | O42646 | A0JYG9 | P32940 | A8XP97 | O83880 | Q32LK1 |
| P37000 | Q6UXU0 | Q9A0L9 | P09711 | Q4Q0V1 | P38747 | Q08014 | P72161 |
| Q9C948 | A3DGF4 | Q73JF6 | Q54YS6 | Q972G5 | A6NHG4 | P93422 | O43044 |
| A3PCN6 | O94625 | Q6UDF7 | P45701 | Q54LS8 | P43974 | P21860 | O66959 |
| Q58124 | P22502 | O66112 | P0A5A0 | Q4R4V2 | Q9J507 | O95263 | Q63603 |
| Q6GZU7 | P25616 | P36170 | O60503 | A5HJM1 | Q1JU72 | Q54WC0 | Q6P444 |
| P30527 | Q9F723 | B2ZB95 | Q03219 | A5F964 | Q7RTY8 | Q9M3A8 | Q9Z7F9 |
| Q00871 | P40004 | P13782 | Q57696 | B8PYG1 | Q10189 | P53270 | Q67593 |
| Q7UXN7 | Q8MP00 | P18813 | Q9CQY1 | Q6CVX2 | P49175 | Q6IPT2 | P41469 |
| P94575 | Q53143 | Q6GQI8 | Q47418 | Q9BZD6 | Q888L8 | Q8QFP1 | Q54GL3 |
| Q9BQN1 | Q5ZMV8 | O53279 | P23200 | P15782 | Q10934 | Q8RFX9 | Q7KRY7 |
| O67413 | Q8IZM0 | Q55BM0 | Q9D7S0 | Q96MD7 | O86109 | Q99570 | Q8R5K6 |
| Q3V4U6 | P42425 | Q9IA02 | Q5UQ52 | Q97JN9 | Q9FYC8 | P12546 | Q42598 |
| Q23977 | O15050 | P05670 | P15278 | Q4JSJ5 | Q03196 | Q6Z7L3 | P42539 |
| O64218 | A8AG49 | Q8TA86 | P24252 | Q58336 | P64561 | P63702 | Q08419 |
| E1BRC3 | O83966 | P77129 | Q9DUB9 | Q5A312 | Q9ZMM1 | Q94AR4 | Q196V7 |
| Q02505 | Q6FRE7 | Q8YRV2 | Q18788 | Q8K4H1 | Q7MV19 | Q9J5A5 | O74959 |
| P38869 | P26745 | P37127 | O93654 | P44221 | Q17004 | Q60279 | Q1E8C2 |
| Q9X095 | Q9MB58 | P06624 | P45408 | Q60W34 | Q870L2 | P38068 | O31882 |
| P45866 | O23406 | Q9DG58 | P14774 | P07882 | Q8BYZ1 | Q9PUR0 | P81993 |
| O31126 | Q5JES6 | P37789 | P54078 | Q5JZQ8 | Q00609 | Q6L0N2 | Q9FIG9 |
| Q5EAF2 | O31557 | Q3L7M0 | Q55CE0 | Q8J1G7 | B0JFB8 | A9ILJ3 | Q5H7N6 |
| Q9NJU9 | P71850 | Q05181 | Q9CP15 | Q9ZEC0 | P45301 | Q32LZ8 | Q96MT0 |
| P35855 | P40457 | P40899 | Q10952 | Q08842 | Q98QK3 | Q16222 | Q72XU4 |
| Q9BR76 | Q9CLV1 | Q5NLB9 | P76122 | Q9U2M8 | Q9XW78 | Q4FS43 | O95626 |
| Q86BA1 | P10946 | P33775 | Q9R4G8 | Q9RA11 | A7ZHD4 | O94624 | P33848 |
| Q8CFV2 | P36096 | Q9E6M6 | Q10PZ6 | P75329 | P49107 | Q57152 | P19004 |
| P24919 | P28193 | A2AED3 | Q21929 | P46551 | Q9UHT9 | P08702 | P29041 |

---

|        |        |        |        |        |        |        |        |
|--------|--------|--------|--------|--------|--------|--------|--------|
| Q09791 | P34572 | P64543 | Q13401 | P45756 | P09496 | Q68D86 | Q6UXT8 |
| Q9Y225 | Q05380 | Q9USI0 | P94559 | P53170 | Q5RII3 | P0C1T3 | Q5UPH8 |
| P45275 | Q58805 | Q9FMQ9 | Q9ZQC5 | Q8XBV9 | Q11076 | Q01961 | Q9CMP7 |
| P95260 | Q00799 | Q9MUL5 | A1JT33 | A7KAJ7 | Q54433 | P0AA79 | P0C5H5 |
| Q8R205 | P29131 | Q9LYV6 | B2A2I4 | Q9FMK7 | Q5UQ93 | Q4WYA5 | O88917 |
| Q55BZ5 | P37569 | O71153 | P32668 | Q89717 | Q6MG64 | Q8GUK7 | Q4WFX9 |
| P54952 | P81718 | Q5UQA1 | G2TRM4 | Q12092 | O13909 | P38256 | Q28199 |
| P29306 | Q91G76 | P01813 | Q6ING9 | O28150 | B8H364 | Q70LC1 | Q9Y6F1 |
| Q9Y227 | O86281 | A2BN59 | Q04004 | Q5MZD9 | Q83C31 | Q89WN1 | P44569 |
| Q9JKC9 | Q75E45 | D7GXG3 | Q9S733 | P40974 | Q96MP5 | P03785 | Q53U08 |
| Q17353 | P59467 | Q9ZDQ0 | P55370 | O69726 | Q57486 | O04211 | O07940 |
| O32157 | P45670 | Q89AQ9 | P17735 | A1ZB91 | Q99N50 | Q5UQF1 | Q8GZ43 |
| P35556 | C0H3W0 | Q40863 | P26640 | Q12791 | A8MU10 | Q2NU62 | Q9HDX4 |
| P20405 | Q8IUR5 | O31594 | Q75E74 | A4ZUB2 | Q6P8Y0 | Q6P461 | Q54UD4 |
| Q7CGA7 | P38675 | G2TRL0 | Q9C9K3 | B2V8C9 | A6QL50 | Q47836 | Q91G56 |
| Q57950 | Q25BG1 | P46470 | O34861 | Q60294 | Q9ZDY1 | Q12344 | O48529 |
| P49914 | O31799 | O43080 | P47653 | P49806 | P29705 | Q8HDG8 | Q65195 |
| Q9ZDT5 | Q9H910 | P54507 | O51924 | O35004 | P38290 | P23226 | P53756 |
| Q90115 | P26504 | Q9RMV5 | D3Z7P3 | O32611 | O25093 | Q00104 | B3EWI4 |
| O60318 | P40809 | P13186 | Q6FU42 | Q9FME4 | P52714 | P02765 | P41140 |
| O13738 | B2HGH0 | A3MCH1 | Q9LFC5 | P22226 | Q9ZEP3 | Q9BLM0 | G2TRL6 |
| Q9KD20 | Q88417 | P54442 | P39328 | Q9ZQ34 | Q25BG7 | P0A922 | A3MSS2 |
| Q9UST3 | O53449 | Q08358 | Q8T2U0 | Q9FDA3 | Q9LQ95 | O60575 | Q86I75 |
| Q9LVT1 | P21741 | Q9STF9 | Q6BDI9 | P15033 | P07771 | Q9H943 | Q53562 |
| P46463 | P23305 | P54389 | Q8NFA2 | Q01416 | O66404 | O34930 | Q58317 |
| Q9RDL7 | Q5EA01 | C0H3V8 | P75528 | Q5XK85 | O06727 | O29190 | Q10078 |
| Q9SI57 | Q9YD08 | O67421 | P21395 | Q6R7F0 | P81286 | P95257 | A1AJL2 |
| O35600 | Q9RU24 | Q5XPJ6 | Q46817 | Q5UQC3 | P63716 | P36274 | P45285 |
| Q89592 | P52911 | P30541 | P08304 | O05455 | Q7AA80 | Q2R1Z5 | Q5TFG8 |
| P17616 | Q14DK4 | Q5UQI8 | P76559 | Q9P7I8 | Q5XBB2 | Q9N2L7 | P40350 |
| Q8N0N9 | Q9UJC3 | Q7UNR2 | O04251 | Q7T321 | Q9BWU1 | P47649 | Q5UPB1 |
| Q9Z5E9 | P13847 | P27882 | Q5UQM3 | Q568R1 | P0A5B8 | Q9I3N6 | Q6PDG8 |

---

|        |        |        |        |        |        |        |        |
|--------|--------|--------|--------|--------|--------|--------|--------|
| P50464 | P76254 | P80343 | Q9UTR5 | P53974 | P80680 | Q9I8Q3 | Q96EN9 |
| P87163 | Q869Q8 | P55532 | P29835 | P21361 | Q19425 | Q7CI09 | O94520 |
| P36022 | P53908 | C5DD31 | Q1RIY2 | G2TRR8 | P83310 | Q9ZVN6 | Q09213 |
| P0CI14 | P24391 | O55647 | P44583 | Q8VKH3 | Q54MJ9 | Q7TS55 | Q3E784 |
| Q9STX3 | O13671 | Q04434 | O45319 | P16784 | Q94A82 | Q5UPV7 | O32201 |
| Q3E743 | P21016 | A7TMZ9 | A9MP50 | C5DII3 | Q58T65 | Q9AGA7 | C0H439 |
| C3XR70 | P14084 | Q5UP28 | Q9NPH5 | P58989 | P46850 | P03771 | P86146 |
| P43018 | O67364 | Q9LW20 | Q28557 | Q04833 | O74504 | P40547 | Q98014 |
| P42567 | P0A9K5 | B3EWF5 | Q9LQ55 | P30393 | P53943 | Q7CGI0 | Q63QJ0 |
| P09295 | P76548 | Q86VZ4 | O85674 | P12572 | Q6ZNR8 | Q7KWM9 | Q9VFX1 |
| P78605 | Q2V2P6 | Q5S007 | P43112 | Q03831 | Q54MC9 | Q24498 | Q9TKZ2 |
| Q8Z8E5 | O67553 | P05993 | Q1KXP6 | Q9ZE59 | Q9UTB1 | P70791 | Q58947 |
| A6SFL7 | Q8IY50 | P26800 | P29818 | Q5RE57 | O36382 | O93517 | Q98FL2 |
| P43991 | P0AEX3 | Q5T036 | Q6AQ14 | Q9UTG1 | P15754 | Q9VSB9 | O07177 |
| Q58589 | Q8CQD9 | B6JMJ2 | P38810 | P27989 | A9HC14 | Q9LMR4 | Q62470 |
| Q57951 | P27379 | Q08238 | P77858 | Q7WY77 | Q9RYM9 | Q94AZ2 | P45385 |
| P15260 | P86208 | P10234 | Q9XC90 | P42510 | O06483 | Q8WS88 | P68355 |
| O31647 | Q4R1I9 | Q18JL4 | P32157 | Q02643 | Q55FC6 | C5DE09 | Q9KXJ6 |
| P38332 | B0XPR3 | Q9BXT5 | P54915 | P47065 | A8XDX2 | P26012 | P15399 |
| Q9FL07 | A4GZ97 | Q72NP4 | P01000 | D4AIS3 | Q01259 | Q45358 | Q8RVH5 |
| P09885 | P0A1I2 | Q60522 | Q12374 | A8XPL7 | P11864 | Q00940 | Q8AW42 |
| Q85230 | Q5URB1 | Q50830 | P64092 | P37495 | Q5K5C1 | P20347 | O74316 |
| Q5L6W5 | B1AI60 | P75491 | Q47745 | Q10Q63 | Q9K1H0 | Q9WZF6 | Q9C4B4 |
| Q55116 | Q9GMB7 | Q65158 | P03718 | Q54VV5 | O36394 | Q0IHV1 | Q9SY07 |
| C6Y4C6 | P10426 | Q8L4M1 | P72699 | Q86T13 | O06091 | Q9QZR8 | Q27533 |
| O28325 | F0KFM4 | Q84Y95 | Q9ZU97 | Q93W20 | Q59017 | Q61333 | Q8NEP4 |
| Q6PK57 | P40177 | A9BGS7 | A3DDH7 | Q9US27 | Q09202 | Q9ET22 | P38800 |
| P55080 | Q6DRP2 | Q9Y6E0 | P43988 | P26305 | Q587J8 | Q8SQ26 | Q32KY8 |
| P49788 | O07188 | Q12519 | Q09GK2 | Q50849 | Q32NS2 | Q08315 | Q5UQN0 |
| O66565 | O29830 | Q00571 | P94135 | Q9Y3A3 | P26362 | P03753 | P43004 |
| Q8SPZ1 | P15099 | O27252 | O67472 | A7WZC5 | Q6FU40 | A7F679 | Q90352 |
| O67138 | Q2NKV2 | Q1JUQ1 | P08726 | P25203 | Q831P3 | P31236 | Q5UR97 |

---

---

|        |        |        |        |        |        |        |        |
|--------|--------|--------|--------|--------|--------|--------|--------|
| Q54J35 | Q914J5 | Q2HJF2 | Q09242 | Q0WQ91 | Q874C0 | O14120 | Q9V2X1 |
| Q5L7W2 | B8FNN4 | P50519 | Q9UBI9 | P53199 | Q01249 | O51073 | P32438 |
| Q7N3M3 | Q62924 | P46934 | P34296 | Q8BHA1 | Q5ZKN5 | O28095 | P48299 |
| Q83KI5 | Q8ZA34 | Q47499 | O31287 | O35926 | Q497Q6 | O97401 | P77610 |
| Q67ET0 | P51239 | Q53U10 | Q9HGM2 | Q99027 | Q09638 | Q5I149 | Q6L8F9 |
| P17791 | O94595 | Q9LJF8 | P75978 | B1ZUK1 | O34350 | Q12453 | Q4FQK7 |
| Q6CPX2 | P16450 | Q3UYV8 | Q8SVF7 | Q80U56 | Q5AI58 | Q8RU95 | Q2G1F3 |
| Q0IIB1 | O28377 | Q5UQU3 | P01067 | Q8L3R2 | Q9BZR9 | Q1CT10 | Q51705 |
| O89085 | P13194 | A3A8W6 | Q54YD9 | P55684 | Q9NI63 | Q54FF3 | Q3M5M3 |
| A6UU98 | Q68DA7 | P49013 | P32464 | P70997 | O83469 | Q54MZ8 | Q4V7X9 |
| P19781 | Q6PKH6 | Q56953 | Q03546 | P0C9J0 | Q86YR7 | Q8BVU0 | A8WE67 |
| Q12111 | P03783 | P96688 | C4XIS0 | P53253 | C4V8L1 | O14301 | Q54CC5 |
| Q6PI77 | P31446 | P55103 | D4GPU7 | P02775 | P53585 | Q502E5 | Q65371 |
| P34026 | P84988 | Q58048 | Q5NDL3 | Q54PG5 | Q5SF96 | C0H3U0 | Q84V39 |
| P06486 | Q54FK5 | Q9EXD2 | Q2V2Y0 | Q5XF75 | O95500 | Q96BF6 | P53129 |
| Q9SG96 | P31381 | Q914G3 | Q86HQ8 | Q99210 | P00739 | Q752N3 | Q19189 |
| Q566Z6 | Q8TDU5 | Q5URA5 | P09730 | Q02817 | P02671 | Q5LLE7 | Q08CL3 |
| Q08486 | P27750 | Q9BPD7 | Q9KSB4 | P04538 | Q64964 | Q9LK58 | Q9FG85 |
| Q9JMS7 | P68571 | P48960 | Q9YB03 | B4N369 | P31226 | O60052 | Q92396 |
| Q8XJL8 | P55461 | Q07967 | P47273 | Q5JR59 | O07009 | P37270 | Q54WE5 |
| Q54C55 | P00143 | Q10268 | O94594 | P22577 | Q07978 | Q9LSV3 | Q9HLP8 |
| P80564 | Q9SM43 | A1L253 | Q20010 | O32130 | Q9XDM4 | Q54JL7 | Q54NW7 |
| Q54LV7 | P75859 | P79017 | Q96LB3 | Q12359 | P43606 | P17177 | Q6FM98 |
| Q6T6T4 | P16028 | Q9D676 | P23451 | P38079 | P70175 | Q92JJ7 | Q6R7J9 |
| P13284 | P36626 | O64511 | Q9BRK5 | Q54V44 | Q92JM6 | P37294 | Q9ZLE0 |
| O28790 | P55240 | O36017 | Q50047 | E6RM71 | Q9PTL1 | O29145 | Q9LUH2 |
| Q3E7Y4 | Q8D3J6 | O83645 | Q54DB1 | Q8ZH96 | O55749 | Q3IRT2 | Q9P6L9 |
| Q84WW2 | Q12V67 | Q8NEN9 | Q88FY5 | Q750S2 | P10259 | P53918 | Q80TA1 |
| P65574 | Q5E9L7 | Q9NQE7 | Q44840 | Q58205 | O28476 | P0C1T6 | Q36967 |
| Q60282 | Q8LL17 | Q49775 | P39713 | O74920 | Q740Y5 | B1VTI8 | P61032 |
| P20500 | C6Y4B8 | P25954 | P39497 | Q5TCY1 | Q9LZ19 | O95562 | Q96PY0 |
| P08138 | Q14194 | P21521 | O55736 | Q4KWH8 | P45434 | P23355 | Q880Z2 |

---

---

|        |        |        |        |        |        |        |        |
|--------|--------|--------|--------|--------|--------|--------|--------|
| Q5VZP5 | Q7XTS4 | Q0V9V5 | P42707 | O06079 | Q9ULI0 | P04201 | Q9M2D8 |
| Q5UPU2 | Q02805 | P17055 | Q9P7N9 | Q05016 | Q60414 | Q59R24 | Q495Z4 |
| Q9VH95 | Q39202 | Q93Z24 | P25806 | O28611 | P80220 | O31523 | Q9KJF0 |
| P0AFW8 | P55678 | P45552 | Q6FMV8 | Q08632 | A5VU91 | Q5RKN4 | P68583 |
| Q09871 | Q9SV72 | Q8RF47 | Q750L8 | P75737 | B0SII1 | O32007 | Q6WB94 |
| O42996 | Q14002 | P31561 | P24871 | Q0V987 | B4UN34 | P87309 | Q03611 |
| P16779 | Q9TT92 | P03239 | Q6CIT9 | Q62471 | O55237 | P96600 | Q5RHU7 |
| P21602 | P04370 | Q26418 | O51750 | Q9MA92 | P37007 | A8X0C4 | Q54VI1 |
| Q75W84 | Q9SV05 | P62368 | Q6FJ45 | P14109 | P03709 | P48334 | Q13YI7 |
| Q9P6K5 | Q5XC60 | Q9UPY8 | Q9D9W1 | A2RI45 | Q9A777 | A1WUX4 | P47699 |
| Q6NV34 | B2C6F2 | P23984 | Q90125 | P09425 | Q3T0E9 | Q5FKQ9 | Q9JWJ3 |
| Q93Y38 | A5UUJ5 | O94279 | P0C655 | Q2S433 | Q5X8H6 | P38971 | Q77MQ6 |
| Q96X49 | A7X4L4 | O61397 | Q8JFG3 | Q12511 | P42536 | Q01026 | Q8BUP8 |
| P29582 | Q5FRR4 | Q6YNI5 | Q8ZU30 | P29815 | P39042 | P33554 | O05406 |
| Q3AAW3 | P18670 | Q70Z53 | P32278 | Q5I133 | A8XEQ8 | P52291 | P07748 |
| P55815 | Q8CH01 | Q7JK24 | Q9H7H1 | Q29BR3 | O35609 | A2YGP6 | P07789 |
| O07621 | Q7SXX7 | P26225 | Q54BD1 | Q5TCS8 | Q4P7C7 | P18896 | P51102 |
| P31382 | P44279 | Q9SVZ9 | Q5EFU4 | Q2NKQ1 | Q46943 | Q75JK6 | Q02373 |
| P13092 | P68656 | Q56564 | Q9ASR4 | Q9USK0 | P53888 | P42955 | Q01344 |
| Q9STY3 | O26638 | P76551 | Q03550 | P44053 | P68178 | Q5UR53 | P55677 |
| Q9VPT5 | Q54WD7 | Q9VAC8 | P93227 | Q7SEW2 | Q3ZBA3 | O06477 | Q8I5I1 |
| P47111 | P75169 | A7TQS6 | Q640Z9 | Q9SKK8 | P25659 | P40949 | Q9XV66 |
| P13082 | O30300 | Q97CA8 | Q88426 | Q81CW7 | Q8BHB3 | Q59750 | A8QZJ5 |
| P25571 | Q54MC8 | Q9A4F4 | Q9FH28 | Q86CS2 | Q53GA4 | P40761 | Q91ZW7 |
| P09565 | P0CV97 | Q8VBV4 | Q57651 | P32800 | Q5GH76 | Q57895 | B7Z8K6 |
| Q84MC0 | Q8SVC0 | O05813 | Q6R7L3 | Q8N5Q1 | Q67669 | Q9H169 | Q9IW99 |
| A0JNH1 | Q08DK1 | Q8AIH6 | Q9CLQ8 | Q8T690 | Q8TEV9 | Q04912 | C7YY76 |
| A5E0V1 | P92127 | Q03021 | Q8QL28 | O29998 | P14499 | Q573B8 | Q5UPD4 |
| Q8KCK7 | O32166 | P30606 | P03481 | A2YP56 | O49146 | P40503 | P0A369 |
| O28598 | P35648 | P45176 | Q9RY24 | Q55FQ9 | Q58411 | Q12155 | Q553D3 |
| Q92IC3 | P65530 | Q2KIL1 | Q3E7A4 | Q4R6N0 | Q5EAB0 | P52135 | Q27245 |
| Q9FLP7 | P41771 | Q92ID7 | O94644 | Q89A44 | Q9I310 | P13234 | O88634 |

---

|        |        |        |        |        |        |        |        |
|--------|--------|--------|--------|--------|--------|--------|--------|
| Q65132 | O13476 | A6NMS7 | P0C8Q6 | Q9C104 | Q9SWE5 | P37182 | Q5UR19 |
| A8LS52 | P72151 | Q8MUF9 | Q8K0W3 | Q9FIM2 | Q82PZ0 | Q80T22 | Q5UQ67 |
| P53904 | B4YNF6 | P54468 | P40691 | D0KQM8 | D1BJD0 | P25136 | Q4FV24 |
| P33050 | Q90873 | A4ZUC6 | Q23544 | Q94AS5 | O94255 | Q5K130 | Q58041 |
| P19076 | Q30YK6 | P34355 | A5F4P6 | P94777 | Q9J5H4 | P27178 | P53906 |
| A1YV58 | P38216 | P42490 | A5IYE2 | Q9MFP7 | Q17766 | Q8C7B6 | G2TRQ9 |
| Q08361 | P34163 | Q10197 | Q8AXQ3 | Q9HD23 | Q9HKE4 | P41711 | Q57913 |
| Q755J5 | Q5UQB6 | P0C7R1 | Q9CWQ8 | P27833 | Q32LH4 | P11528 | A8E283 |
| O29156 | A0LDU6 | Q8EQY4 | Q09116 | P0AAR8 | O50161 | P02925 | A6Q574 |
| Q9W358 | Q5UP04 | Q8SU90 | P30113 | O01839 | Q8LA14 | Q54K67 | O60260 |
| Q9G058 | Q6H849 | O60110 | Q10510 | O46584 | Q12114 | P52418 | Q9P0W0 |
| Q58726 | Q5XPK0 | Q9Y238 | Q9Z896 | Q5UP95 | P44293 | Q04691 | Q9K6W2 |
| P93319 | Q5UQM2 | Q9U2T3 | Q9P6N4 | P75991 | Q04RM8 | P09962 | O14269 |
| Q4WVT3 | Q9VWE6 | A3KNS2 | P16005 | P28993 | Q58862 | Q3TTY0 | Q5V213 |
| P34138 | Q8NHQ8 | Q9SF78 | Q82XD4 | Q0V9K2 | Q96DC8 | P0CY93 | O60178 |
| Q553R6 | Q8VJ51 | Q06758 | Q4L4W4 | O83819 | O43103 | O88338 | Q5JIH9 |
| Q5UQ74 | Q24X59 | Q9XGZ9 | D5AQY8 | Q9Y7B3 | Q9UBX7 | P52311 | B5XQ62 |
| Q04921 | Q8IUC8 | O55760 | P0A4N1 | Q6FJ19 | P44842 | Q9FHX2 | O17624 |
| Q32LF5 | Q5UQJ8 | Q6CQN1 | O10284 | Q9FH80 | Q5UQC0 | P38148 | Q9UJ41 |
| P35800 | Q8TD86 | Q2KIJ2 | Q7NAZ3 | Q92213 | Q12047 | Q9I969 | Q8BGR2 |
| P13486 | Q8GW57 | B2RIV3 | Q5VTM2 | P32972 | Q9CAG5 | D4B5L8 | Q9NQ30 |
| O32266 | Q9UKA4 | Q9C1W3 | Q914L3 | O74507 | Q9RQ88 | Q9VR82 | Q03686 |
| Q4N4N8 | Q9Y6R7 | Q5UQG1 | Q8BGW2 | C4NYP8 | P27894 | P35733 | Q13163 |
| P48329 | Q876N4 | Q7F0R1 | P31004 | Q890M6 | P97435 | Q8ZDB2 | P45944 |
| Q6CGE7 | Q6PHG2 | Q9NV44 | P40527 | B3A0R8 | O94537 | Q8MNU8 | P20206 |
| Q7M758 | P75995 | P25565 | Q54UC9 | Q55EL3 | A1L2S8 | G2TRM7 | Q6F059 |
| P40603 | Q7XWS7 | O94280 | Q5URA8 | A4D0T2 | Q2RBE3 | P15234 | A1L2E4 |
| P08794 | C0H465 | Q92502 | A7SDA8 | Q8VZ95 | Q8EVS4 | P38194 | Q47887 |
| B8HPI0 | Q5R4J9 | Q2FED6 | P0DH87 | Q1RHI6 | Q6BT11 | P25666 | P00121 |
| Q44243 | Q57738 | Q1IEC3 | Q8BCV6 | Q08373 | Q8WWU7 | P40995 | Q6QNF8 |
| P37711 | Q8VYP5 | P32812 | O09452 | Q9H9L7 | O49326 | P0CP05 | Q8N8H1 |
| Q504F3 | P45950 | Q8TX56 | Q67YC0 | Q0WQQ1 | Q00749 | Q4IJW4 | P0AA33 |

---

|        |        |        |        |        |        |        |        |
|--------|--------|--------|--------|--------|--------|--------|--------|
| Q0Q465 | P22231 | P36678 | O05510 | P44791 | P09662 | Q58377 | Q87KN9 |
| Q09230 | Q9D478 | Q9UTQ8 | O61902 | O13986 | A6NMD0 | P71079 | A3DHI6 |
| P68434 | P20049 | Q0B746 | P19824 | P10836 | O07014 | P15897 | O67428 |
| O31067 | Q0P4K8 | P38943 | Q57427 | Q54M18 | A2VD00 | O02387 | P0CF96 |
| Q10263 | O08358 | D3SYZ8 | P28908 | P94951 | Q29236 | Q53HC0 | Q13610 |
| A8XKV0 | P29010 | O28606 | Q25BG2 | Q9SI02 | Q6FJ28 | Q00733 | Q18014 |
| B2ITV8 | P83977 | Q4WQL0 | Q0IHQ3 | O48881 | P45905 | Q9Y2J2 | Q03218 |
| Q2YIT6 | Q7XYM4 | Q680Z7 | Q07108 | P40531 | Q8Z5A6 | Q17QN4 | Q59601 |
| Q9P6K1 | Q75EN9 | Q58980 | Q10935 | P33757 | P07394 | P41949 | Q9LU94 |
| O66758 | O18824 | A1A4L0 | Q6CUE1 | A1S0T1 | Q8QVL7 | Q09835 | Q9J4Z7 |
| A2WYE9 | Q9A5D7 | Q6ZRP5 | P54734 | Q8S5M8 | Q8T4E1 | Q9NDH7 | Q9BPQ5 |
| Q95224 | A7TN63 | B2STP6 | P38464 | Q9CWL8 | P43302 | O74750 | Q0WLC6 |
| P19276 | P83903 | P39083 | P60172 | Q9XTN2 | P45524 | Q96266 | P75077 |
| P0CW76 | Q76QZ8 | P59037 | Q8VHG0 | Q48464 | Q72VK0 | P44747 | P36935 |
| P43446 | Q52983 | Q94AA1 | Q9IAY4 | P44942 | Q45774 | Q8IUH5 | Q9ZE18 |
| Q93PU8 | Q86H39 | Q2FLN5 | O22959 | Q48IV1 | F2Z3M2 | A7HDG7 | Q91F73 |
| O83992 | Q80Z19 | O49603 | Q9A354 | Q9ZPR0 | O74497 | Q9UTD8 | P0A5Z1 |
| Q6BYP8 | Q54F97 | Q07454 | P28265 | A1XJK0 | Q55792 | Q00245 | Q8CDZ2 |
| O87908 | A4W0K2 | Q9D727 | Q9CAT6 | Q4UJ67 | O34849 | Q9UTG3 | Q05473 |
| Q9NZK5 | Q14SY0 | P76219 | Q3EBP0 | Q6R7I1 | O13553 | Q6NTF7 | Q9U943 |
| P42575 | P38109 | Q10244 | P32793 | P81913 | Q8GWL2 | P71065 | P38992 |
| C8ZJM1 | A6S3E0 | Q27995 | Q7TSL0 | O14944 | Q54KD4 | Q93YW0 | Q8QVL4 |
| A5FYE6 | Q9BKJ9 | P96913 | P96010 | Q197E0 | Q73J26 | P71014 | Q5FWH6 |
| P54338 | Q24K16 | O30280 | Q5XA33 | P12533 | P41473 | P53929 | P06484 |
| P47056 | P19363 | Q13SY1 | P38752 | P29739 | P87027 | C4R591 | Q8VI84 |
| Q9RMZ8 | P20843 | Q8N131 | Q5H913 | B0SDA2 | Q6FLP6 | P0CY46 | Q7NI46 |
| P0A617 | P28732 | P07077 | A5U0B2 | Q4U3U9 | Q9QYJ6 | Q0W4W4 | Q54W04 |
| B5X3I1 | P82974 | Q8K1R7 | P48362 | P53681 | P43975 | Q55BF2 | P55709 |
| P12058 | P86888 | Q55988 | Q9SZ95 | P0C853 | Q57321 | P08399 | Q54GE8 |
| G2TRN3 | P46058 | Q5UQG9 | Q8MR31 | P29912 | Q2TBA0 | P42109 | Q9QY39 |
| Q6CRE9 | P61154 | Q55DQ4 | P32083 | P70583 | Q6R7K0 | O52071 | Q10474 |
| Q9AJD6 | Q91FU0 | Q9URY8 | Q24342 | Q08E20 | O13932 | Q5UP68 | P75347 |

---

|        |        |        |        |        |        |        |        |
|--------|--------|--------|--------|--------|--------|--------|--------|
| O30173 | Q8RKH1 | P32912 | Q69554 | Q54UF5 | Q6X4T0 | Q9LVG9 | P18192 |
| Q9USX0 | Q9K548 | Q94AX5 | Q7S110 | Q55GT2 | P13411 | Q9TUH9 | O57774 |
| P26489 | Q6GZS5 | P00541 | Q2KIS9 | Q9VAS7 | P75139 | P96638 | B1P1B0 |
| Q6FYR2 | P41708 | Q10352 | P15977 | Q9MBG5 | Q50232 | Q4GWU5 | P83179 |
| Q9I492 | C4YG73 | P48672 | O26106 | Q10435 | Q6FVJ1 | P11437 | Q54LD5 |
| Q8SSH7 | P02518 | Q54WR5 | P68357 | Q914G0 | P79058 | P40001 | Q9A8J2 |
| Q80Y83 | A1CQC3 | Q757H2 | O26773 | Q197B1 | G5EEM5 | Q9AS36 | P0ADM9 |
| P31624 | P86203 | Q5BL29 | Q72RH6 | Q86DA7 | P39139 | Q0WRB2 | Q5L9E0 |
| P96656 | P55376 | P19557 | C5DQ18 | O15273 | P46378 | P97056 | P97636 |
| P28549 | Q96C74 | O75157 | Q5WF04 | P23644 | Q1MTR7 | A9BJX6 | Q9HM28 |
| P07620 | O67669 | Q10269 | P02855 | P44114 | P20356 | Q57942 | Q6CHP1 |
| P81511 | Q5R0Z7 | P54360 | P76164 | B0G159 | Q10417 | Q54EX5 | Q54QR1 |
| Q89AV7 | C5DRG2 | Q96QE4 | A2ZFY7 | Q98930 | P23327 | Q9NPH9 | Q2MJU7 |
| P49193 | Q229Z6 | A3KGK3 | Q6GZU8 | Q55CW3 | P23550 | Q32KS0 | Q96N64 |
| Q6R7H6 | P81281 | Q89AF0 | Q5UP91 | Q8VC88 | P38700 | Q45271 | Q03956 |
| Q8EXQ7 | Q9K6A3 | P45586 | P42837 | P47533 | Q61DP2 | O29740 | P40488 |
| Q96PV7 | P00721 | P12049 | Q8TBB1 | Q9HDW1 | P54326 | Q5XJK1 | Q8Twx0 |
| O67523 | P73894 | P17118 | A8AK82 | Q1A261 | B3STN7 | P41561 | Q12YW2 |
| P86982 | P95008 | Q940P5 | Q197A3 | Q5P5G6 | P18169 | Q6DBN5 | P86953 |
| P46557 | Q06SD4 | Q38668 | A7X0P5 | Q2KIH1 | Q59683 | A5E057 | Q9R9I1 |
| Q10408 | Q9XPI2 | P11372 | P39160 | P54337 | Q58FG1 | O06708 | Q89EW7 |
| Q5JSL3 | Q9P7W4 | Q8I467 | Q197F8 | Q54757 | O02769 | P0AGM6 | P53755 |
| P24583 | P15821 | P81232 | P96611 | Q5ASP0 | P22776 | Q8NI77 | P04683 |
| P01049 | Q08734 | Q8VYJ1 | Q10497 | P54373 | Q97B34 | P48935 | P32629 |
| Q94402 | B0BRI0 | Q8KLB6 | B5XAM2 | P54330 | Q8RBR1 | P08948 | P51736 |
| P19040 | P57222 | Q58098 | A2XNL6 | O94602 | Q9V979 | Q9P6J1 | Q9SCY5 |
| Q6ZWK4 | Q6P0S3 | Q9H321 | O34988 | P36881 | P39107 | Q2L897 | Q21890 |
| Q60370 | P71979 | Q8LFA9 | Q6S9Z5 | Q08EC4 | Q04835 | P34610 | O13843 |
| Q54P13 | P77694 | O30602 | Q9UUI8 | B0G126 | Q6BTW5 | Q46812 | P0DJ88 |
| Q9H1Z9 | Q9C1K8 | P37558 | O27318 | O29669 | Q90577 | P03998 | B8CAZ5 |
| O80927 | O29730 | Q7NCS0 | Q91WT9 | P20829 | Q92J60 | P39602 | Q54X31 |
| P64427 | Q01025 | Q9KU25 | Q49AS3 | P89679 | P07167 | Q46927 | P87239 |

|        |        |        |        |        |        |        |        |
|--------|--------|--------|--------|--------|--------|--------|--------|
| Q09802 | Q48943 | Q16048 | P21824 | P03412 | Q2M238 | Q553J1 | Q4P8R5 |
| Q9PX43 | P48305 | P76042 | Q2V369 | Q08DF7 | Q9D9Z7 | P13341 | Q9NRW7 |
| P31759 | Q91400 | Q9FLF4 | Q12305 | P0C7G9 | P47121 | Q9M9T0 | P41366 |
| P0CI02 | Q8N9K3 | O60132 | Q8RWS8 | Q8IX29 | Q6BIT1 | Q08345 | C9SPU8 |
| Q9XIE0 | A0LSL0 | Q57785 | Q50585 | Q58984 | A8AVK0 | Q6Z3A8 | Q3ECI7 |
| Q07536 | B2VEU3 | Q54BW1 | Q9E6N5 | O07604 | Q9US12 | Q6CIJ3 | E6WMH4 |
| Q2TB02 | Q9LU68 | Q6UY62 | P06936 | Q04948 | Q3E8B0 | P36003 | Q9AVB0 |
| B0R5N7 | A5PHT0 | P60589 | Q14439 | Q925F2 | P28723 | Q9M122 | Q9JWE9 |
| A4IIV4 | Q58764 | P38452 | Q9VP04 | Q2NHN9 | Q9P6Q0 | P83997 | Q93UZ0 |
| O14145 | Q54SK3 | Q8TDM0 | Q9VAU9 | A1BAK9 | Q9ZU90 | Q01467 | C7C422 |
| Q3V4S2 | Q0IIL4 | C1JJY7 | Q55EA1 | Q6ENX7 | Q00298 | Q8MII8 | Q0UE25 |
| O29665 | P40580 | O86362 | Q65T32 | P81581 | Q44902 | P27103 | P04094 |
| Q12450 | Q584D5 | P03854 | Q9VEG6 | Q01353 | Q8VZP6 | Q2KNE5 | P16065 |
| P39163 | Q18J06 | Q9C919 | Q26896 | O83691 | Q9HCI7 | P37491 | P45913 |
| Q09464 | Q86YW7 | Q9FY68 | Q9Z994 | Q57066 | Q8YX97 | P71044 | P0ACX3 |
| Q9NL39 | P18963 | O94627 | Q9WIB9 | O13632 | P45704 | O46587 | O67893 |
| P44623 | Q8X092 | Q7VG29 | Q72K16 | Q58571 | O96363 | P28495 | O73622 |
| A3MAS4 | P43484 | Q1LY51 | Q96N19 | O69740 | Q8TDR0 | Q8EUM5 | P17334 |
| Q12202 | P0C5K7 | Q9D9A7 | P0C2S6 | Q60DN5 | Q9J517 | P16552 | P42529 |
| Q7VFP7 | Q12058 | Q9ZC49 | P52047 | Q9BV10 | O13808 | Q9CA63 | P76364 |
| Q5UQP7 | P64546 | Q91X13 | Q54SS8 | Q8DG35 | P75463 | P76499 | Q9KYX0 |
| Q6MDK7 | Q8NA29 | Q9AIP8 | O66457 | Q75EJ1 | Q53E76 | P48353 | Q54K35 |
| O84543 | Q9Z868 | Q9P7Y8 | G3XDA7 | P42864 | P94488 | P25910 | Q98855 |
| P64923 | P85227 | Q87AR8 | Q06852 | Q76LV2 | A6QAM3 | P76092 | Q67YI6 |
| Q9ZKW3 | Q9LSQ6 | Q2TBS3 | Q9HC29 | F7V999 | P86195 | P31383 | O31917 |
| Q8PU66 | Q5UPS1 | Q19683 | O66975 | A2SY66 | Q8QV02 | P42535 | P60154 |
| Q9HHT0 | Q54TG1 | P80544 | P14209 | Q02596 | P42664 | P44446 | O83827 |
| P51203 | Q97BG7 | P50505 | Q03376 | Q9NTX9 | Q60312 | Q5PQQ7 | Q9YDX7 |
| Q3E7A8 | Q9SR01 | P50053 | P16699 | Q5JT25 | P23283 | Q7TQN8 | O74913 |
| Q23TC2 | P21849 | P77716 | P33010 | O24575 | P41735 | Q9XF89 | P0AEA0 |
| P0CB23 | Q05497 | P82632 | Q7U0N5 | P25338 | Q9PHW6 | P01633 | C9D7C2 |
| Q91VC9 | D2Y2B6 | Q54DF2 | P96825 | P96285 | D4GXC5 | Q9LE59 | C0H3Y3 |

---

|        |        |        |        |        |        |        |        |
|--------|--------|--------|--------|--------|--------|--------|--------|
| P55502 | P22751 | P97799 | P03597 | Q2RSB3 | P81589 | Q9CNW3 | Q9QJ50 |
| P55149 | O33833 | Q8IYB1 | O57593 | Q6C1E4 | P24620 | P0CK12 | Q08220 |
| O29292 | Q46631 | B1P1J4 | P20748 | Q92932 | Q2UQY2 | Q8N8X6 | Q9RZA4 |
| F3Y9Q5 | Q6H7J6 | P15442 | Q8GXR9 | F4HTM3 | Q9C109 | O34559 | P32562 |
| B3A003 | Q48899 | Q8BGK9 | Q9KK91 | Q6W0C5 | Q8N6C7 | Q54NK3 | A8E657 |
| A8JUV0 | Q8VY13 | Q9D3V1 | O06875 | Q04413 | Q95PZ0 | Q9WU47 | Q86IG2 |
| Q8XL46 | Q19468 | Q07940 | Q8X8D5 | Q09662 | Q8WZK5 | B7FRE8 | O94670 |
| P0C5N1 | Q57716 | A6QGC0 | Q54XI9 | C6A4F1 | Q9KFF1 | Q9WZR1 | Q4VT39 |
| O34779 | O32239 | P33336 | Q0IIL2 | P20758 | Q54JQ0 | Q8SVY8 | P0DJ66 |
| Q8RX01 | P58701 | P33518 | P27816 | Q92360 | Q8PZ55 | P39726 | Q19PY9 |
| P71063 | Q8VBT1 | Q9NQ60 | Q9WUS4 | Q9ZT49 | Q01267 | A4ZU89 | P18152 |
| A7TGR0 | Q92356 | P43055 | Q24298 | Q24278 | P33366 | O85728 | P76319 |
| Q8TYM5 | B0R758 | A6ZQE9 | P45386 | Q9UNE0 | Q9UK39 | Q5UQF5 | P55515 |
| P75049 | A2ZBG5 | Q54XR2 | B0WC46 | P30219 | Q9ERK0 | P06558 | Q05298 |
| Q9PJJ6 | P50864 | P53510 | O58968 | Q9M0D0 | Q96DN0 | Q5RCW9 | P37298 |
| O74446 | Q58310 | Q9P7E9 | Q8K2H3 | P85190 | Q9SYG9 | Q45583 | Q9C6I2 |
| B4RTA0 | Q8GR69 | Q91X34 | Q8CAS9 | Q9FFZ2 | B0G194 | Q93U24 | P43045 |
| Q3SHI2 | P26723 | Q8GEK8 | Q71RG6 | P55694 | Q6P1H6 | Q9QXE0 | O31695 |
| Q5VU43 | P42253 | Q5UQT1 | A5UZ79 | Q9P3E4 | B2KIK3 | Q06152 | Q8CFW7 |
| Q9Z469 | P31956 | O51060 | O74917 | P33362 | F2JXJ3 | P0CY58 | C4Z3C6 |
| Q91F69 | Q6AWW0 | P15333 | Q92367 | O53474 | Q9H095 | Q06734 | O14146 |
| P36324 | Q8RB27 | Q6NRH7 | Q9LNC0 | Q04005 | O69481 | P37020 | Q29175 |
| Q3E960 | Q5BGR2 | O94664 | O69653 | P85992 | A7Z9Q6 | C1H3X3 | C3P6X0 |
| P19385 | Q58402 | Q10136 | A8JAM0 | P34436 | O42970 | Q86B91 | O94888 |
| O34402 | P00127 | P48799 | P0CN93 | P46104 | Q755M5 | B3A0S4 | Q44335 |
| Q7T2D0 | Q3E793 | Q8BU27 | Q2J7K4 | O30135 | P0ACE8 | Q97YC7 | Q54SZ9 |
| Q3E8Y5 | Q9CEL6 | Q8R8N2 | Q573C1 | O32083 | P59935 | Q8JZZ7 | Q75B70 |
| P58094 | Q6SZ87 | Q9LVQ8 | Q9Y572 | O07684 | Q58717 | B2KE54 | Q9W7S2 |
| Q6FLQ1 | P30879 | O34626 | Q6DIB5 | P83304 | P38767 | Q9DHF5 | Q03304 |
| Q9X1D7 | Q55EI3 | Q52926 | O31769 | O93967 | P34658 | P13007 | Q940Z1 |
| Q7TS68 | O29261 | Q93W10 | Q7RTP6 | O66741 | O29350 | Q69YW0 | Q197E9 |
| C0Z7G8 | O75970 | O60721 | P30291 | Q9KER1 | Q7ZVC2 | P30305 | Q96Q40 |

---

|        |        |        |        |        |        |        |        |
|--------|--------|--------|--------|--------|--------|--------|--------|
| Q5UBV8 | P58337 | B9MS71 | O31948 | Q5V4L7 | Q6ZMY6 | P0A928 | P03046 |
| P87178 | Q96NE9 | P08959 | Q00147 | Q30KJ8 | Q9P329 | Q09499 | Q9ULL4 |
| Q5VT28 | P41413 | A8NS89 | Q2TWP5 | Q0IWF3 | Q13316 | P29518 | Q1RJQ4 |
| Q8G6J6 | P38842 | A7YWP4 | Q8N6G5 | Q9P2N2 | Q70LB4 | Q6AUW3 | Q54JZ1 |
| A7XYJ6 | Q6GZU5 | P05782 | P26703 | Q8N6S4 | Q8K2L8 | Q9I4U2 | A2SMA7 |
| P52143 | P96642 | Q9CHL6 | A8C927 | Q18F28 | Q01819 | Q9HCN6 | A5D2M7 |
| P50907 | P34654 | A4STH4 | Q03904 | Q14153 | D4GUF6 | P53536 | Q01024 |
| Q712K3 | C7GJG9 | Q0V9S0 | Q2J9S4 | P56620 | P92535 | O29485 | Q08428 |
| Q96Q07 | P0AEE4 | Q497N7 | O30176 | P64541 | Q8GWK1 | Q65X23 | Q04697 |
| G8FZS4 | Q50701 | P45217 | P63708 | Q46888 | Q40189 | Q06GK1 | P47450 |
| P0A3D4 | Q8IU80 | Q95Q39 | Q6NYU6 | A7MBI7 | O83081 | Q9ZKG7 | Q99394 |
| Q54UQ4 | Q6NDF6 | P34357 | Q8CFM6 | Q9LX93 | Q18319 | P26223 | P54007 |
| O31725 | B3GSH5 | P34494 | Q8TVI1 | Q9C6W9 | P60979 | Q9LEX6 | Q9HPH7 |
| Q18685 | Q6BQJ1 | P55577 | O28482 | Q9ZU29 | P25728 | P55588 | O42563 |
| Q58056 | P91416 | O48397 | Q5SW45 | Q54ZM4 | Q2KJ25 | Q9SJC6 | Q9GMU6 |
| Q9NJD8 | O60303 | Q6WG17 | Q9UW12 | B7F138 | Q9UUB6 | P64176 | Q9P2Y5 |
| Q9HCM1 | P31686 | Q54JU0 | P97224 | Q57124 | Q9C660 | O28768 | Q6UDG1 |
| P79679 | P93283 | P77087 | P09551 | Q04266 | P80481 | C0H3T2 | Q5UR52 |
| P03942 | O66819 | Q9BX66 | Q01802 | Q94AA4 | Q6CM46 | Q7VHR4 | O29259 |
| Q6URH7 | Q9UI32 | P0A2U5 | Q09420 | Q9VG55 | P0CM51 | P96972 | Q0QLF7 |
| P80675 | Q804S2 | Q5UPW6 | Q6BSK5 | Q5XIP4 | O54912 | B2KBZ0 | O17901 |
| P38769 | P32450 | P52731 | P38350 | Q9FI39 | Q5UPQ2 | P89113 | Q9RXG6 |
| P06459 | P21299 | P87264 | P37297 | Q6CMB5 | Q6FWS7 | Q09214 | P09818 |
| O31719 | Q9P7T1 | Q9W6R5 | P03725 | P96747 | P39494 | P44174 | Q12184 |
| A1L4Y2 | P26688 | P17213 | Q9P3B1 | P81131 | O34368 | Q9UP38 | Q2KIK2 |
| O86225 | O66853 | Q7ZWG6 | B1Y382 | Q1MTR5 | Q9ZBL1 | P32155 | Q09556 |
| P26486 | P52961 | Q9M392 | P00771 | P03413 | P28735 | Q1BU34 | Q58642 |
| P39564 | Q9XWQ1 | Q7XAK4 | Q53222 | P15518 | Q4RU86 | P59047 | Q54YP8 |
| P75354 | P75253 | Q5ZHN4 | Q6ZMU1 | P11449 | P24720 | Q94A64 | A8XWC4 |
| P22184 | Q11104 | P0C891 | Q44141 | P83516 | Q9LQ47 | Q10094 | A8XNJ6 |
| Q4V8G0 | Q54KB9 | P94576 | B4EVU5 | D6C4I7 | P48236 | Q831A2 | Q7Z3B3 |
| Q58514 | P09522 | O01949 | Q68FR2 | Q52WX2 | C4R492 | O14093 | B3LLP9 |

|        |        |        |        |        |        |        |        |
|--------|--------|--------|--------|--------|--------|--------|--------|
| Q2W3D5 | Q03311 | G2TRQ0 | G1C1T2 | P29817 | Q8I145 | Q40297 | Q14687 |
| P08390 | A0RXK2 | Q8BXQ8 | P0A4V1 | Q54TR5 | B0BXL6 | P40781 | P75193 |
| P43787 | Q11YP2 | Q93LL2 | Q19459 | P57018 | Q6ZUU3 | O74876 | A1IGV8 |
| Q9VGX3 | Q76NV7 | Q75JK0 | Q3SZ44 | Q65670 | Q08316 | O53904 | Q6NRI1 |
| A2VCK2 | Q58102 | Q9HB20 | P54432 | P69594 | O94400 | P0C8P2 | Q2HJM9 |
| O13990 | A7Z061 | Q9RMW2 | B0S296 | P62499 | Q9A3S1 | P60967 | Q9D0B6 |
| Q1HPL8 | Q9LK94 | Q4R910 | P53271 | F1MUS9 | P23647 | C1G2L9 | Q5VVB8 |
| Q9DCS1 | Q9CQ90 | P45597 | A4FU01 | Q6B2I9 | Q9CNE3 | Q9UU85 | Q57KZ6 |
| Q3TTL0 | O46166 | Q9SR77 | O53278 | B0R5L0 | P27599 | Q9TM18 | Q7SGZ5 |
| Q9NRU3 | Q9VGU5 | Q96IV6 | O08340 | P83742 | A8A9U0 | Q8X7G2 | Q58537 |
| P14220 | A4W435 | Q7ZWY2 | Q9H2M9 | P0ABF5 | Q9P9T6 | P38269 | P81921 |
| Q70LD6 | B2HHZ8 | A1A5P5 | Q0P3P6 | Q1I0U3 | Q6UUW5 | Q1BUR8 | Q67706 |
| P46838 | Q9FGY4 | O34640 | P42724 | Q8ENS1 | A1B3I3 | Q3E829 | P30789 |
| P98052 | Q6ZST8 | O83607 | G2TRP8 | Q05785 | P67446 | P0DJ41 | P16760 |
| P30235 | Q09851 | P39742 | Q05119 | Q17R89 | Q6GDZ1 | P0CAH8 | Q0JEZ8 |
| D1FNJ9 | Q9XA16 | Q7NQB1 | O13641 | Q9NS75 | Q9UHR6 | P03787 | Q07596 |
| P25361 | Q80XH2 | Q99186 | Q9Y9D9 | P22474 | Q12261 | O36385 | Q4L7X2 |
| E9Q6B2 | Q9C1S9 | P25475 | P17157 | Q50290 | Q9VR52 | Q1LZF3 | A8MRC8 |
| P42093 | P58335 | O59697 | Q97U03 | A8XWD1 | Q0UEB6 | Q54EQ1 | O88575 |
| Q91FU6 | Q66654 | Q8RKI7 | Q9ERE2 | Q0AYD5 | Q88894 | Q1EIQ3 | A7FM05 |
| P11365 | P17407 | O69227 | Q9KI13 | Q9CER7 | P54488 | Q9DUC2 | Q9XXN3 |
| O67892 | Q8CHJ0 | P84117 | Q8NGC0 | Q9UF83 | Q8N394 | Q0TRE4 | Q38488 |
| Q6CNC8 | P55185 | Q03548 | O78420 | Q938C8 | Q5NGW7 | P44263 | P16064 |
| P46680 | O81025 | Q86AY4 | P55607 | Q20332 | P54492 | Q68EN5 | P96659 |
| Q9NUV9 | Q8QL27 | Q06451 | Q556R9 | Q5TAA0 | Q4JVV1 | Q9SMJ3 | O06391 |
| Q94KJ7 | Q96AE7 | Q3E7A2 | Q54727 | Q9D992 | P16172 | O13824 | Q5E9A4 |
| Q05613 | Q91ZF1 | Q6XCF2 | P55479 | Q9AT00 | Q01076 | P16746 | Q14108 |
| Q6ZVF9 | P47048 | Q96253 | Q62077 | Q94A65 | O66127 | P81171 | Q21339 |
| O22151 | P39261 | P46802 | Q86H65 | Q48677 | A7RM45 | Q95000 | P23163 |
| Q6BUM6 | P0C7U5 | E7Q2L9 | D0ZI38 | Q93NB7 | P21686 | Q8T2I5 | P08800 |
| P12616 | Q9PL35 | A6MWT0 | Q24475 | P27194 | Q9H808 | Q40546 | O05524 |
| P32418 | P58036 | Q65674 | P38232 | P45374 | P30646 | P57999 | Q5UQR1 |

---

|        |        |        |        |        |        |        |        |
|--------|--------|--------|--------|--------|--------|--------|--------|
| Q54JY7 | Q55F71 | P34328 | Q8NA54 | D3UX49 | P64749 | Q9X697 | Q9UTD4 |
| Q008X5 | Q12218 | P50100 | Q96GE6 | Q9KD45 | A6NG13 | Q10932 | Q54ID7 |
| Q1C7P8 | P30748 | Q5UQT9 | P10392 | Q9V6G5 | Q58304 | C5D5S0 | Q08ED0 |
| P48368 | Q54LD8 | O15926 | P21362 | Q9C0W1 | Q6ZRH3 | P59590 | P75606 |
| P48416 | Q9EXD5 | Q9P7V8 | P12780 | Q9P7Q2 | Q6R7D6 | P09945 | P05841 |
| P06875 | Q9CR76 | O62682 | Q8UEU8 | Q10S58 | Q7XSV4 | Q58DN7 | Q3UPL5 |
| Q08416 | Q64766 | P45590 | P71696 | Q4JXJ7 | O14336 | Q3TDX8 | P49584 |
| O31858 | Q5ZIR9 | Q9LUL6 | Q5B288 | P26725 | Q9LRB0 | P0A5D7 | Q88FX8 |
| A1K3G9 | O45924 | Q25BH9 | P38233 | Q9YW20 | P07663 | Q3Z992 | O94483 |
| P91127 | B9MRX9 | P51702 | Q8C8T7 | Q46971 | O74922 | Q44007 | Q04341 |
| A6X935 | Q52118 | Q9UKI3 | O14256 | Q5I2D0 | O77480 | P93028 | Q58729 |
| O34593 | P39975 | Q9GZU5 | Q58EG3 | Q04383 | Q05B54 | P15155 | Q08736 |
| Q8I817 | P45515 | P53348 | P22365 | Q75A58 | Q9SZN7 | O83461 | Q49939 |
| Q01752 | B6ULW4 | A7KAN7 | Q9I747 | P87176 | Q8NEV9 | P58593 | O53573 |
| P10835 | P82998 | Q5UQT0 | A5PJN0 | Q6FEP2 | D5L5Q8 | P0ADM2 | Q95SS8 |
| P85317 | O77775 | P53969 | P47044 | P51131 | O34414 | P76097 | P39752 |
| Q54VL5 | Q86A83 | Q9FIQ1 | P75208 | A5WFM3 | O05246 | O74411 | Q58005 |
| Q09917 | Q89AL4 | P59025 | Q8NDB2 | P0A3R6 | Q23917 | Q58318 | P81898 |
| P31186 | O94600 | A3CQ04 | Q9UKK6 | Q32NC0 | O06629 | Q3T0K9 | P38451 |
| A4D250 | P50544 | Q09373 | O75678 | O74395 | Q84168 | Q9Y117 | Q01109 |
| P0AC25 | Q9SRE4 | P0C198 | P33115 | Q8U2Q8 | O94486 | O95466 | P40523 |
| Q969H0 | Q9C0Y2 | Q9XUJ7 | P71380 | Q7SEY9 | Q06317 | Q9D2H2 | Q24211 |
| Q9ZDG6 | P27443 | P26143 | Q924P3 | Q9FKJ0 | Q3E9F0 | Q6BEV5 | Q54SR0 |
| A7XQ02 | Q27571 | A1SI37 | O05795 | Q96MS0 | Q9FPS9 | Q9WYG7 | P51282 |
| Q2USI0 | P77416 | Q55914 | Q6ZS62 | P09516 | Q99N46 | P86204 | O64221 |
| Q51887 | Q58157 | Q57947 | Q9UTC4 | P13212 | Q554K2 | P22573 | P34713 |
| Q68EK9 | Q63661 | Q10215 | Q9LUD7 | Q03CB3 | P40085 | Q8T197 | Q0ZGT2 |
| Q86YS3 | Q47860 | P87050 | Q84JR3 | P25639 | Q874Z5 | Q10364 | Q06401 |
| O31994 | P0AEJ7 | P20194 | P03936 | B4UN83 | O75264 | Q55CK2 | O14836 |
| P37363 | Q06696 | B9DK35 | Q9WIJ8 | A8MZ26 | Q32L10 | P32782 | A6QQP7 |
| O04086 | Q5UZH5 | P0ADL0 | Q07084 | A6NKX4 | O32087 | Q034G9 | Q32905 |
| Q10190 | P47166 | P16151 | Q17389 | A4ZUD9 | P29824 | Q5F4A1 | P0CK58 |

---

---

|        |        |        |        |        |        |        |        |
|--------|--------|--------|--------|--------|--------|--------|--------|
| P22919 | P13504 | Q8IN23 | O74981 | Q08DK0 | Q6EBC2 | Q17851 | Q5UR01 |
| P0C724 | Q8BJL1 | Q55FT5 | Q90ZD5 | O32221 | Q54K76 | P41729 | P42101 |
| Q9CIR9 | P53184 | Q56714 | Q54EF5 | Q47899 | P18924 | Q5WJQ2 | P04288 |
| P29122 | Q9H0C8 | O07917 | Q9JIL5 | B6H6F3 | Q6ZTK2 | Q1BS37 | P81943 |
| P00132 | P34363 | Q4PHC3 | Q8TR06 | A0M3K2 | P47022 | Q5UR74 | Q2YL70 |
| P40125 | Q9UTN7 | O60165 | P22963 | Q5L521 | Q94CH5 | Q17Q91 | Q89250 |
| P40180 | P0CE96 | Q9SZ52 | Q3V4V7 | Q18007 | P0AD71 | P21647 | O28022 |
| A3DIM5 | Q2FVK2 | O94394 | Q21059 | Q9S4D5 | Q8TGL8 | Q91G50 | Q7L273 |
| O17264 | Q8L5Z7 | Q59284 | P75745 | D4AKU9 | Q0VA04 | Q50657 | Q57755 |
| Q9KFG3 | O68215 | Q8TC26 | P97844 | O13898 | Q64761 | Q6C3D7 | P28151 |
| P94393 | Q86283 | Q8H0T9 | P71053 | Q5P5G2 | P11384 | Q8N1V8 | A9CM07 |
| P17687 | Q9PQX9 | Q8SWP1 | Q45FA5 | Q9VJJ7 | P55454 | O83463 | P34973 |
| Q1QPM0 | Q6H6R9 | Q940Q3 | Q9H089 | A8H9I2 | P53156 | Q6BYF0 | P37617 |
| Q09774 | Q62101 | Q0VCP9 | Q5UPJ6 | Q9NQ76 | A4H7A3 | Q54C45 | P90761 |
| Q8KG79 | A7TQP0 | D4GQ16 | Q9FGN8 | Q9EQJ0 | Q04756 | Q9RVF9 | O05503 |
| O58371 | A9GFF3 | P09294 | Q46JW9 | Q6FKB4 | Q6YFE5 | B3EU56 | Q86SA8 |
| P0DJQ8 | Q9LXJ6 | D4H539 | B1AJZ1 | A8FRQ9 | Q0IHW6 | Q9DF69 | Q6SW14 |
| C0S902 | O49696 | Q9LSS5 | P55491 | P50834 | P48611 | P41698 | Q03442 |
| Q8W471 | P18612 | Q9GYV5 | P40977 | Q6UDL6 | Q7TSQ1 | B5FY93 | O67189 |
| P14184 | P37749 | O52057 | Q10917 | Q9LTV6 | Q68FQ8 | Q65RN5 | Q136A2 |
| P43253 | Q55B06 | P80866 | Q58DH7 | Q01594 | P08F94 | Q9UTI9 | Q9P7T0 |
| Q5F3D1 | Q7L099 | A0JM08 | Q9HYH5 | Q9UFD9 | Q9BYM8 | Q9ZDX7 | Q5UQ04 |
| P33705 | P34001 | P19278 | A0LDW8 | P38732 | Q54J37 | Q9Y6Q2 | P22099 |
| A8Y3V5 | P0C1E8 | B0G0Y8 | Q15043 | Q9V4P1 | P24132 | P45685 | O10303 |
| Q914J8 | Q9LNE6 | Q9W5G6 | A2A7Z8 | P80872 | P17148 | P37645 | Q14684 |
| O31506 | O83273 | Q17QK6 | Q9H400 | Q9YA72 | Q8FHF4 | Q9UBG3 | Q10668 |
| Q04401 | Q95ZE3 | P55335 | Q6MX07 | P25676 | Q57860 | Q5HY92 | P38844 |
| Q58711 | Q56Z59 | O23461 | Q1DME3 | O74832 | Q50336 | P81912 | Q02752 |
| Q0C8J3 | Q6H3X3 | P76569 | Q8YT42 | Q86XR2 | P56134 | B0T0X6 | A8MDI3 |
| Q09551 | P55689 | Q54IN6 | Q750R7 | P40867 | Q5ZJB4 | B9L1X1 | P23263 |
| Q9WYH0 | Q5JE64 | Q751A7 | P81058 | O17816 | P55472 | Q96HU8 | Q8ZW59 |
| B9KHS3 | Q6CQ13 | P48933 | P77598 | P27508 | P43992 | Q8IVF2 | P05986 |

---

---

|        |        |         |        |        |        |        |        |
|--------|--------|---------|--------|--------|--------|--------|--------|
| Q9ZCF9 | P0DH65 | P86742  | P39993 | Q8IV32 | O28688 | P34380 | Q9ZLU4 |
| Q58DF9 | Q8TDN4 | Q2IL01  | B2WKX9 | Q9CX56 | O34429 | Q1KVU2 | Q9ZCY5 |
| Q9Y9T6 | Q6ZMV9 | O31969  | P45267 | Q9CZX2 | A0N0X6 | Q32L52 | P34430 |
| Q8STE8 | Q47824 | Q810U2  | Q54W36 | Q3V4R5 | P21058 | P97032 | P0A144 |
| Q58639 | Q6PDN3 | P46204  | O94527 | Q96NU1 | P28848 | B3DTV3 | P0DJH2 |
| Q97T80 | Q8TAV5 | Q96QF0  | A3DLP6 | Q9LYU9 | Q8IV77 | Q9STY0 | P42826 |
| A8XMF2 | Q10043 | Q940Q8  | Q8R0K2 | P81323 | Q9PR82 | Q00273 | Q3UMG5 |
| Q6CG20 | Q99P87 | Q2Y8L4  | P27058 | Q6NPN9 | Q96MC9 | P54580 | Q6NUQ1 |
| Q9JLS0 | B1ZU31 | P04888  | Q6L6S1 | A8XV40 | Q5R829 | Q86TU6 | P19693 |
| Q59051 | Q8GUJ2 | A6NEL3  | D5ARG9 | Q9NZV5 | P08354 | Q10937 | Q5UP69 |
| O95081 | A1Z8E9 | Q17061  | Q7DLR9 | Q8N7X8 | Q9P8K9 | P24418 | P77596 |
| O13561 | Q9YDX6 | P44248  | P43217 | P01149 | P09876 | Q9Z0X0 | Q91145 |
| O96923 | A6ZKI3 | Q53683  | Q9FVX2 | Q11YP3 | Q54M77 | Q6FNP6 | P53293 |
| Q80XI7 | P10681 | Q24751  | Q9HV11 | Q755Y8 | Q54BL8 | Q51700 | Q9P799 |
| P54883 | C5DU06 | Q1DF98  | A6ZRG6 | Q0P5E7 | Q1RIF2 | O31516 | Q9ZCW4 |
| Q02407 | Q9D8U4 | Q7U6V8  | Q9BY27 | Q8S7E1 | Q5UPI4 | B6KAM0 | O70324 |
| Q8GXC7 | Q57640 | Q0VBY7  | Q10949 | Q2LGZ2 | Q1RMM5 | P31621 | Q9S597 |
| Q810B9 | Q7N4V9 | Q9SCU1  | Q92903 | P04540 | Q9NYJ7 | Q9W2F2 | Q24323 |
| Q9YH58 | Q91V98 | Q8K4D7  | Q9LJV9 | A1TC01 | Q17060 | P54820 | O83911 |
| Q5UQ27 | P55691 | Q91743  | Q3BTU8 | Q9E6M2 | O67088 | P39695 | Q09690 |
| O67264 | P38868 | Q0II44  | P80232 | Q8ILI6 | P74917 | O95715 | Q96L16 |
| Q9USR1 | P52552 | D7GXXG5 | Q36284 | Q05224 | Q9ZJ48 | P41734 | Q3YEC7 |
| Q6H8M7 | Q5HXN6 | Q58902  | Q12233 | O69062 | A8ERK3 | Q9HXY5 | O43687 |
| P80015 | F5WT83 | Q7P0S6  | P57019 | Q5K6N0 | Q5B5W2 | O27458 | A1ST89 |
| Q77PU6 | P90895 | Q86WH2  | Q5UPD9 | Q57965 | Q6ZQK0 | Q54PP6 | P74002 |
| P58832 | Q8N2E2 | Q7M4F4  | Q24524 | Q03212 | P0A5G3 | P55568 | Q6GPH4 |
| P22402 | Q54KV6 | P49269  | Q7LKZ7 | Q5UXB8 | P11459 | P18348 | Q3MJ13 |
| Q20170 | P55341 | Q6D913  | B6VQA5 | Q6GQ49 | B5CY73 | Q9HLZ7 | Q9U6B8 |
| Q3ZCD0 | Q6FJL9 | P94965  | P82170 | Q5DU57 | Q9QJ28 | Q7P1R6 | P18243 |
| P33275 | O28690 | Q90WJ8  | Q6ZRU5 | Q63ZV0 | O13683 | Q9XJS1 | Q5UP37 |
| O23610 | Q3V0C3 | Q93ZB1  | Q0UNW1 | O95236 | P75142 | O29990 | Q00099 |
| Q9KWN0 | P87140 | P42713  | O34621 | P77564 | Q6NZ09 | P53951 | Q9PFQ9 |

---

---

|        |        |        |        |        |        |        |        |
|--------|--------|--------|--------|--------|--------|--------|--------|
| O34906 | Q01477 | O82533 | Q9Y7T9 | O76368 | P53144 | Q66638 | Q9NW75 |
| Q86YT9 | P81248 | P0AEE1 | Q77FQ3 | P55585 | Q0VCZ0 | Q27968 | Q9YGD3 |
| P0CJ06 | Q7VEP8 | P28964 | Q5UQH7 | Q9GUC9 | Q9UBS9 | O64600 | P19296 |
| E7RAI2 | P31414 | Q31YW9 | Q01969 | O54820 | F4IXT6 | A6H754 | Q9FIZ3 |
| O81775 | Q45757 | Q5UQS4 | Q6MGM3 | P0C0X6 | O84000 | P46652 | Q10659 |
| Q8BG28 | Q9WZ56 | Q04SA4 | O74426 | P29337 | P96769 | Q07897 | Q8IXL6 |
| P42937 | Q8BVA5 | Q58149 | O60320 | Q9BVV8 | P19844 | Q9W6M9 | Q8S2G0 |
| O14929 | P55609 | Q7TSP5 | C5DGI8 | Q05239 | P54072 | Q54VG4 | Q72B27 |
| Q573G8 | Q03667 | Q8C494 | Q58859 | Q02728 | Q5HI96 | Q9VZE7 | Q8V3U3 |
| P25929 | Q9I7X6 | Q75DG4 | Q9KRJ0 | Q52328 | Q8Y3L4 | O34753 | Q6C216 |
| Q2HJ18 | Q75G46 | Q05491 | Q5I4E6 | Q03085 | Q1L8H0 | Q8BL99 | Q55026 |
| Q1LZD1 | B7K911 | Q8TB61 | Q98829 | P14708 | Q402B2 | O68943 | P09485 |
| P30326 | P57260 | P0A8Y3 | P09729 | Q06691 | P33989 | Q9VS59 | A8FK97 |
| Q52892 | A2BM05 | Q5Z6F5 | P71677 | D7URV0 | Q0V5W8 | Q00130 | P83592 |
| Q6L147 | P24764 | Q867X3 | O87690 | Q45347 | Q68Y86 | P04506 | P96680 |
| Q00848 | O34554 | Q58580 | P22833 | Q924C5 | Q3B7S5 | Q61476 | E1BDF2 |
| A8MQ11 | P38986 | Q03478 | Q4FM64 | P29068 | P34622 | Q5UNV8 | Q99748 |
| Q629K1 | Q556K9 | Q90ZB9 | P47829 | Q9P324 | B2V8C0 | P47371 | P11037 |
| Q9QZ39 | Q8BH50 | P14898 | O29378 | C0H3Y5 | P58990 | P46103 | P20605 |
| Q58009 | Q9RTK2 | P22804 | P83098 | Q9BT17 | Q8LPI0 | O19094 | Q9ZK14 |
| P37016 | Q99MS7 | O83921 | P30813 | Q9FG65 | Q8QZV6 | Q8NfZ6 | Q83885 |
| Q9LF38 | Q38065 | Q54G42 | Q83AC1 | P25354 | P45622 | O43451 | Q5ZJH7 |
| Q00224 | Q8LAW2 | Q9UUK4 | A8FRR1 | Q54XT6 | P20744 | O83637 | O13576 |
| P71017 | Q8MMH4 | D3RQU0 | Q22885 | O20142 | C0LGh2 | Q5UQI1 | Q9U616 |
| P23481 | Q9U2R0 | P39458 | A5A8Y8 | Q55G83 | O13999 | Q5UPN4 | Q6UDH1 |
| P20714 | Q65961 | Q2FYR2 | Q62240 | O74837 | Q6ZTN6 | Q8NEA9 | P0DKP3 |
| Q9D4V3 | Q13QU8 | O34055 | Q9Z0G4 | Q02889 | Q9C500 | P0C091 | Q9LPH0 |
| Q5UNW8 | P34052 | Q8R089 | O94596 | Q57940 | Q96N35 | Q9H0R3 | Q50644 |
| O27993 | Q00516 | P35753 | P11670 | O84071 | Q9ZUT4 | P41755 | P71019 |
| Q7ZWB7 | P80361 | Q8VYD6 | P94691 | P55717 | P11469 | P16480 | Q04385 |
| Q8RMH6 | Q54V85 | Q9UUG5 | O04200 | O80526 | P98080 | Q47866 | O94330 |
| Q9SZR7 | Q2FEZ8 | Q5EAE9 | P39234 | Q15942 | Q5TBB1 | P11160 | Q556J6 |

---

|        |        |        |        |        |        |        |        |
|--------|--------|--------|--------|--------|--------|--------|--------|
| Q58985 | P59672 | Q8YFD8 | Q54YH4 | Q969R2 | Q9Y4P3 | Q6PC62 | Q6MTB9 |
| B5LZ79 | Q3E7Z8 | P39479 | Q9NDE8 | Q58462 | P31077 | O32104 | O13530 |
| Q9I489 | A8NWK4 | P58224 | Q28NF0 | P15618 | P38186 | Q1MTQ0 | Q9USP3 |
| P30930 | P75483 | Q9LV12 | P11272 | Q9STS6 | Q9P3U8 | Q1ZXK1 | E6Z0R3 |
| Q5T2R2 | O83478 | Q9C7V5 | P50500 | Q6MQD1 | Q9ZH21 | P14230 | Q9ZUU8 |
| P75979 | Q50422 | A0JPH3 | O74783 | P39789 | Q8G6K4 | O28156 | Q8DKP1 |
| Q86SM5 | Q96H72 | P73930 | O36414 | Q8FT98 | P96207 | P34890 | P15415 |
| Q32PF3 | Q25464 | Q86Y82 | O14155 | P75843 | Q57773 | Q54B33 | P54447 |
| Q6JVE6 | P55905 | P0DH78 | Q12110 | Q99LC9 | Q17745 | Q5UQU1 | I0CME7 |
| Q9USD4 | Q5DTI6 | Q45670 | Q682H0 | P0CS25 | Q03778 | A1JKE3 | O94587 |
| O94509 | Q00229 | P51862 | Q1MX22 | P0ADQ9 | P37836 | Q25092 | Q58794 |
| Q96M85 | Q1MTQ5 | O34897 | Q2QNS6 | Q58463 | Q91ZR4 | P46322 | Q9NY35 |
| B8H9E0 | Q3E7A7 | O74941 | Q5UR51 | Q938B4 | P78218 | P0DKN1 | P05528 |
| Q8U410 | P23110 | Q5SRN2 | Q12512 | Q9U5P2 | P65031 | O83558 | Q9W0M2 |
| Q9S752 | P34586 | Q75JQ0 | P0DJE4 | P27919 | Q97QZ0 | P25238 | O94418 |
| A6NMU1 | P14677 | Q58399 | Q5RC98 | P25946 | Q3S2Y2 | O51468 | Q10683 |
| Q54C64 | P40738 | O28852 | A1L2Y1 | Q12100 | Q20EX8 | Q8TWL9 | P95195 |
| Q9LPC4 | Q5HY64 | P25562 | Q76P07 | Q8VC26 | Q6FUS3 | Q5BQU9 | Q57733 |
| Q55CQ7 | P68624 | Q9QJ43 | Q5UQ84 | Q9DCA7 | Q57621 | O06294 | Q53VY1 |
| P0C6B2 | A5D8P8 | O80800 | Q84DC4 | P26551 | C9RPK4 | P31949 | Q9HAQ2 |
| P86110 | Q9SAA2 | Q26626 | Q09175 | O28147 | P29944 | P75273 | P03292 |
| A4ZUB1 | Q9SS86 | O31702 | A0ZSF6 | O74363 | P40417 | Q8GYL3 | P45844 |
| P73545 | P16395 | P47380 | Q84ZM7 | Q8L844 | Q29S11 | Q98AV2 | Q32KQ2 |
| Q8ZY96 | Q9BYE9 | Q51ZN8 | O13705 | Q9ES28 | P02861 | Q57775 | Q1QE80 |
| Q9X448 | O34855 | P17624 | O76612 | O32047 | P11922 | O81908 | P57752 |
| A3DNJ9 | Q5TBE3 | D8R814 | A5E0N1 | Q8I7F8 | Q9S142 | P0C5R6 | Q9QZM0 |
| O74751 | P14016 | Q5T292 | P19520 | Q5VWC8 | O28685 | Q04174 | P19401 |
| Q9UHB6 | Q02783 | P44573 | Q69YJ1 | P36897 | A4F7P5 | P35811 | Q6QGC0 |
| A5DSN2 | P00144 | Q12168 | P52625 | P46374 | Q24246 | O08466 | P82629 |
| P40577 | Q6R7H0 | P50547 | P0A3V4 | Q86WT1 | Q89DG5 | Q8YN70 | O61063 |
| Q8U3V3 | P0ABD2 | P43167 | A0T0R5 | P40226 | Q65Z59 | P34655 | P53098 |
| P54436 | C5DLM9 | Q51645 | Q09777 | Q89PK5 | O29469 | P23038 | Q51664 |

|        |        |        |        |        |        |        |        |
|--------|--------|--------|--------|--------|--------|--------|--------|
| Q08722 | Q96DL1 | Q9VWK6 | Q9PQZ3 | Q24372 | Q54Q89 | D2C1B0 | P54997 |
| A1JLD6 | Q3MJ40 | P30138 | P32040 | P01867 | O88484 | Q45131 | P38321 |
| Q876Z1 | Q5DW47 | Q5ZMH6 | P20400 | P28983 | Q6DAH4 | Q5RAQ5 | Q0WQM8 |
| Q7ZUK0 | P45289 | Q03308 | Q62894 | Q54KF7 | Q8K375 | O07603 | P0AEL7 |
| Q5UPU4 | P0CP11 | P28629 | Q52778 | Q6BPL7 | P41849 | Q493S0 | F4IQV7 |
| Q09789 | O35094 | Q1XDS0 | P21175 | Q4P5B3 | Q9USZ2 | Q9ZUW3 | Q8X958 |
| P15363 | Q3UST5 | Q5EA46 | Q9Y252 | P77434 | Q753H5 | P73639 | P29233 |
| Q5XET4 | O29171 | Q99W47 | P75863 | Q551B5 | Q96MT7 | G2TRS8 | Q5BKU6 |
| P53540 | O28062 | P22244 | Q2YBP2 | P0A5D3 | Q6UDF8 | O01999 | O67122 |
| P0CJ99 | Q8RXR2 | P0CR59 | Q8WV99 | Q9NUT2 | A1JQE6 | Q9T1T6 | Q08637 |
| O88853 | Q640L5 | Q9W4T0 | Q9XYH7 | Q3E750 | P0A0C2 | P29939 | Q58790 |
| P87128 | Q9W5U2 | Q8WWN8 | Q8TF21 | Q2YDF7 | P0CM91 | O87877 | Q9D9P8 |
| O07753 | B1ZUW6 | Q196U9 | Q59H18 | P49018 | P16425 | D1Z4I6 | P29495 |
| P85964 | Q9P376 | Q1G3Y1 | P20569 | D4GYH4 | Q2G2B2 | A4FZ59 | Q9ZDL0 |
| Q06686 | Q9Y6N7 | Q3ZY38 | P0CE10 | Q6MDQ8 | A4IFL2 | P38758 | O83978 |
| Q2YDJ5 | Q9ZQE5 | Q2LCR3 | P34487 | Q37082 | Q45710 | Q9NXE4 | O32271 |
| Q9FLV9 | Q99222 | Q9V969 | Q58775 | Q37894 | Q9H1L0 | P73888 | P0ADL8 |
| P14872 | P0CI40 | P43298 | P13663 | Q5F5F6 | Q6BMF6 | P81782 | A7TSA9 |
| Q2T9L4 | P16681 | O77086 | Q8WWM7 | Q9XVX1 | D3Z5T1 | Q54WU6 | Q9CA58 |
| Q03070 | P31789 | P0C1G5 | Q96KX2 | Q4PF83 | Q95189 | Q84YK8 | Q9HTK7 |
| A6NLB4 | O65888 | O34745 | P09915 | Q6B4J5 | O44514 | Q6ZMK1 | Q5UPU7 |
| P27113 | B1MZ79 | Q9TU34 | Q75C80 | Q5R3I4 | Q9ZCL4 | P45249 | A0LEQ3 |
| Q9DAK2 | P07374 | A9TKY8 | P71633 | O67591 | Q95TN1 | Q12012 | O17040 |
| O14281 | P46491 | Q9AQS0 | Q02710 | P29064 | Q69577 | Q54WN6 | P71060 |
| Q07408 | P0CI35 | Q5J5C9 | Q6CDX0 | Q54WS5 | Q9C0W2 | P63505 | Q44848 |
| A2X462 | P87064 | Q8TAB7 | Q9VZM5 | Q60SZ2 | P55711 | Q67R57 | Q9CLV6 |
| Q9Z0H1 | Q58CT0 | Q58DS3 | Q914K1 | Q9A1B6 | Q04311 | Q8TJ52 | Q8RVC7 |
| A6GW90 | Q5MIZ7 | P85511 | A7E305 | Q9H825 | Q3SXY8 | A8MYB1 | Q1WUM1 |
| Q0QLE9 | P37786 | A1C3L4 | Q5VYK3 | Q84M47 | Q1DD74 | A5DZ21 | Q6UDK8 |
| Q8NTW4 | O67514 | Q09738 | O94300 | Q499T7 | Q9DCZ4 | Q9NQ89 | O94868 |
| Q42687 | Q8LFQ6 | D9XF45 | Q9J558 | P08175 | Q8TCD5 | Q5UQ03 | Q5EA91 |
| P17533 | Q9YG68 | O06481 | P95241 | Q86B11 | Q9YDW0 | Q5H9B9 | Q07DW0 |

---

|        |        |        |        |        |        |        |        |
|--------|--------|--------|--------|--------|--------|--------|--------|
| Q9VHQ2 | Q1L8Y6 | Q8IYA8 | A5PLE7 | Q870Q4 | P37514 | Q7XJE5 | P19285 |
| Q0VG62 | P53275 | Q01635 | Q86PM4 | Q4P5V5 | Q55D51 | P23044 | Q8N5C7 |
| Q8TGR3 | D2TV88 | O68248 | P30144 | Q8PWX8 | Q28C55 | A4ZUA3 | Q5VU57 |
| Q09240 | Q4WNS8 | O15482 | P10039 | Q21973 | Q9ZVI7 | P26918 | Q53FE4 |
| Q9Y3T6 | Q5BCI8 | Q54EW9 | P34638 | Q9YDM3 | Q7NBF8 | A6QLE7 | P75919 |
| Q9H7Y2 | Q9E6M7 | O58056 | Q26421 | O30086 | P37662 | P0AA90 | A5EYU0 |
| P67097 | Q95LN2 | P06015 | Q00149 | Q5HPA7 | Q289L8 | Q46139 | Q107X0 |
| G2TRT7 | O59705 | P40233 | Q94CD1 | Q9NS73 | O06644 | P46324 | G2TRT9 |
| Q08199 | Q9G2W7 | Q9P266 | P11309 | Q9V5L3 | A2VE56 | Q6CE38 | Q3IKY9 |
| Q9W2U9 | P59046 | Q9M0R6 | Q6AUK5 | Q9ZKP2 | P38104 | O64228 | P20701 |
| Q5UR23 | Q6ZST2 | Q6NTT6 | Q86KL7 | P0C5E0 | P40145 | Q0JA81 | Q9UAS6 |
| P0C6R5 | Q9YEB2 | Q07G34 | Q6CFR0 | Q9INI3 | Q84WG0 | P05945 | P0AAS6 |
| P03619 | P31921 | Q9R1M3 | P0C348 | Q49611 | Q3J170 | P44265 | Q9LH39 |
| B3LFC0 | Q573F1 | Q59014 | Q4FPB7 | Q1JUP4 | Q65Z91 | P40309 | O55744 |
| Q9KJV4 | P14683 | P29505 | Q9FGQ6 | P77147 | O16868 | P75292 | O06983 |
| Q58697 | Q58489 | Q92H16 | Q14CZ0 | Q6V0L0 | O27945 | Q6CMA4 | O07565 |
| Q5ZSQ2 | P08105 | O75355 | P49415 | O33407 | B3A0P4 | Q4KEN7 | Q6ZNG9 |
| P55707 | O33478 | Q36675 | Q18473 | Q2HAR0 | Q12229 | P22962 | Q54V76 |
| P30782 | B4IL62 | P10762 | Q9U1M2 | O13582 | Q8VQB5 | P18640 | Q9ZD85 |
| P57742 | Q9PTT2 | O31771 | Q99376 | Q2TBG9 | Q9FMD5 | P51592 | P13856 |
| Q5VZT2 | Q76LL6 | P52794 | O69762 | Q6YNQ4 | Q10026 | Q28516 | P55049 |
| P49767 | A0RZ28 | D0NVH9 | Q148G8 | P44052 | Q08750 | Q9LK65 | P03762 |
| P53081 | Q54ET2 | P17927 | O35569 | Q4ZGE1 | Q8S2W4 | Q9UPS8 | Q6BPN7 |
| P0A587 | Q7SEQ9 | Q09721 | Q95PI2 | O64837 | Q9SH60 | Q197C1 | P07103 |
| P49053 | Q759K4 | Q44316 | Q8PLH0 | O19898 | Q5NTH4 | P45240 | Q8R514 |
| O32258 | Q8NEA5 | O84882 | Q9V9W8 | Q70KF4 | P29347 | Q0C8Z1 | P80059 |
| Q57688 | Q8W3M7 | Q04977 | Q5WEF9 | Q08CH7 | P04365 | P13619 | O50999 |
| O68983 | A6QPH9 | Q9NPA1 | Q9C112 | Q6GI30 | C5JHY1 | P0AET9 | D4AZK1 |
| P73001 | Q4J9C4 | C0LGV0 | P27730 | O30083 | P0AAR6 | P15381 | Q46670 |
| Q9P7C0 | A2AU72 | Q9U5P7 | Q2T9W7 | P16548 | Q8WWF5 | Q58223 | A6YG74 |
| E9Q8I9 | Q74LZ9 | P09162 | P39590 | A7YW81 | Q5UQ70 | Q6NLC1 | Q54S31 |
| Q9XZH7 | Q90233 | P15610 | P04109 | Q07738 | Q8TCJ2 | Q9E2H5 | P0C9R3 |

---

---

|        |        |        |        |        |        |        |        |
|--------|--------|--------|--------|--------|--------|--------|--------|
| P53120 | Q9YPD6 | Q04PB3 | Q08DY0 | P0C8Q9 | Q5W0A0 | Q553Y7 | Q54KQ7 |
| Q09359 | Q9ESN9 | P16354 | P36362 | O05393 | Q8EUB0 | Q1IJG5 | Q3EDF8 |
| Q02197 | Q6R7J3 | P62557 | O83425 | Q2YMX6 | Q7XU38 | P26904 | P41733 |
| P44115 | Q9BUN5 | P52368 | Q9Y484 | P47232 | Q9VLT8 | Q42676 | Q09423 |
| P36807 | P13313 | Q12350 | Q06670 | O14067 | B7VKH1 | P0CAZ9 | P26142 |
| O34656 | O34834 | Q9ZD66 | P47152 | A7F4S1 | P47876 | P35874 | Q10731 |
| Q9J509 | Q5UR73 | Q058N4 | P94404 | P23779 | P05630 | P34483 | P87355 |
| Q9M5Q1 | Q7DDQ4 | P44843 | Q8NBI6 | O28078 | Q554L2 | Q8NDV1 | P52609 |
| P47485 | P34130 | P33300 | Q9RRA9 | P54452 | Q7Z8R5 | Q3EDH8 | A7XCD9 |
| P25371 | B4MTY2 | Q57583 | Q5HKF0 | Q75QN6 | P36964 | Q6GIX3 | Q5DTT8 |
| Q8N8J0 | Q86QS6 | A7A1V1 | Q6BK07 | P69327 | Q8N350 | Q5C9L6 | Q09352 |
| Q55DU4 | Q57ZQ7 | Q83HY3 | P16369 | Q4Z8K6 | Q0VDD7 | P19325 | P31877 |
| P14501 | P21078 | P0C7Q9 | Q9PPE0 | P13090 | D0ZWR8 | G2TRP5 | Q2V493 |
| Q9TSV8 | Q40357 | Q5R9N7 | P01070 | Q53U19 | O80345 | Q9NVK5 | A4HUY0 |
| P87012 | Q54CI5 | Q85A69 | Q6ZR85 | O71195 | Q8WVS4 | Q9ZD73 | Q9Y106 |
| Q5X4E7 | Q5JGB4 | Q54ST2 | Q10736 | Q22830 | O64203 | P55321 | O60155 |
| O30050 | Q57867 | Q10079 | Q3UJD6 | Q93S26 | Q10918 | Q8NCR6 | O05512 |
| P30907 | P80387 | Q9M571 | Q91FD9 | Q9SR43 | Q8IV56 | P49108 | P41467 |
| P14705 | P50655 | Q9DAR1 | Q8QL31 | Q04359 | B0TQP7 | Q58713 | Q12523 |
| O94111 | A1A4P9 | P22152 | Q06199 | P40985 | A8MRP4 | Q24212 | P83049 |
| Q0P8U6 | P28255 | Q8GS60 | O64393 | Q9L5N1 | O74889 | Q3SYA9 | Q3ZCQ2 |
| P25307 | P90666 | P21976 | D3ZKF5 | Q2RAR6 | Q8GWZ6 | Q6CVZ8 | P37092 |
| P51234 | O13827 | P61366 | P0CB46 | Q28H35 | P31692 | Q9LUS7 | A6KYY1 |
| A7Z439 | Q89669 | Q5UQF7 | P59912 | O14367 | A2BGP7 | A9P1V1 | O16519 |
| Q5UQJ5 | O34352 | Q57SD8 | Q9WVL7 | Q9LUJ0 | P23689 | A1JU77 | Q9H379 |
| Q5XDZ5 | Q6A555 | Q86VQ3 | Q00140 | Q09686 | Q8C1R3 | Q6R8G5 | Q00946 |
| Q54FP4 | P75459 | B8NJB2 | Q1M1A0 | Q696W0 | P17366 | Q7T2A3 | O74381 |
| O77783 | P12826 | O26317 | Q9KS61 | Q9XWV7 | P41714 | Q9VIF5 | P35001 |
| O05398 | Q9VSH2 | P75299 | B3QLQ8 | A5U6S3 | B3LNV9 | P74858 | A9SNJ1 |
| P36343 | E0D877 | Q9HJW8 | P54678 | Q2QWE3 | O83251 | Q9SJL0 | A3LQ44 |
| Q60994 | A7XDQ9 | Q54Q48 | O07293 | Q86VD9 | P0C0K5 | Q9C691 | Q54HT5 |
| Q9ZM68 | Q8NE79 | P34566 | P0A311 | Q11188 | P50162 | O74368 | Q86KA2 |

---

---

|        |        |        |        |        |        |        |        |
|--------|--------|--------|--------|--------|--------|--------|--------|
| P87237 | P51229 | Q9FF17 | P96684 | Q6P2K3 | Q3V125 | O43088 | Q9SMZ4 |
| P76004 | Q73Q17 | Q9LT96 | P0C1T5 | Q90WN7 | A2TJV2 | A1TL08 | O90760 |
| Q9KG52 | Q3IW22 | Q3E7Y9 | O83564 | Q9F5K6 | O43075 | P44262 | Q09671 |
| Q58051 | P22745 | Q07872 | A8ALN9 | Q06578 | Q9CAA7 | P0CF20 | Q6UB35 |
| P59960 | Q96LM9 | P50677 | P20699 | Q54WC3 | O28876 | Q5MKM5 | Q5UQZ1 |
| O08742 | P95158 | P14352 | Q8ML92 | Q6IED9 | Q07933 | Q6AXX1 | Q28314 |
| A5DR04 | P36018 | Q06676 | P76556 | P19740 | Q02122 | O29522 | C7RCP6 |
| O54339 | P54591 | Q6FEZ6 | Q69YH5 | Q6R7G9 | Q04624 | Q5FC62 | O34853 |
| Q2FQE3 | Q9P7N6 | Q8IYB4 | P45475 | O59708 | Q5XA93 | Q9ZT50 | P77567 |
| Q59022 | Q9UMZ2 | P05305 | P06442 | O34528 | Q9CAZ0 | Q59003 | P47614 |
| Q6EPW7 | P46376 | P71602 | P19302 | Q10522 | P0AE28 | P73879 | O78459 |
| Q9VHR8 | B9WZ56 | O26918 | Q55BA0 | Q9KPW1 | Q8V9R9 | O17405 | P04886 |
| P28285 | O84467 | P96657 | Q9J560 | Q4V7A5 | O31814 | Q978J0 | Q25BI2 |
| P36353 | Q54JM9 | P60063 | P46504 | Q08379 | Q9K0V0 | Q37893 | P29489 |
| Q57051 | Q3SZ68 | Q80Y86 | Q9F5K5 | Q0P5L8 | Q920H1 | A8MR93 | D6RRG7 |
| P29632 | Q9XXV8 | Q95029 | B3LTC5 | A8XYX3 | Q56839 | Q39054 | A4H202 |
| P0C9G7 | P93823 | O06343 | P90661 | Q8S8S1 | A1CGA8 | Q6MII5 | O59740 |
| Q02JU1 | Q9ENK7 | Q5RBP6 | P75082 | P94512 | P33447 | Q8MN60 | Q3Z997 |
| P14172 | Q96D05 | P29993 | Q8IX95 | Q09318 | Q9H078 | Q56WD3 | Q9LSL9 |
| O67720 | P24240 | A6VTV5 | C7CM32 | Q57223 | Q313K2 | Q91892 | P55474 |
| P21075 | O78493 | P04461 | Q9HE05 | O05391 | Q01006 | Q9VW71 | Q8TZ52 |
| Q24570 | P0AFN8 | Q9ZST8 | P37496 | P44621 | Q9ZPR5 | B1ZWP0 | P83861 |
| O32136 | Q28524 | Q9JMS8 | P0C582 | Q9R2W4 | Q04949 | Q86KL1 | O50917 |
| A4H1Z9 |        |        |        |        |        |        |        |

---

---

**Test dataset (TeD\_2664)**

---

---

**1332 DNA-binding proteins**

---

|        |        |        |        |        |        |        |        |
|--------|--------|--------|--------|--------|--------|--------|--------|
| Q63003 | P21228 | Q9UBL3 | Q6NKN9 | Q54T16 | Q14781 | P56721 | P11420 |
| O30477 | Q37989 | O80341 | Q9YHT3 | B2JU32 | Q6VB84 | Q92258 | P0C746 |
| P15860 | Q5HK76 | O73932 | Q24753 | P12746 | P09088 | Q9WVG9 | P52551 |
| Q9SYH4 | Q5NB82 | Q8IN94 | P22177 | Q04049 | P86252 | P21538 | P13606 |
| P24928 | Q9NSC2 | Q24U48 | O94714 | Q5F4B2 | Q9NAH2 | A1RY32 | Q9VH70 |
| Q8GZ38 | Q9SGQ0 | Q9SKD9 | P43011 | P55610 | O59780 | P34437 | G5EBU4 |
| Q8WUU4 | P13682 | P14196 | P26275 | P09775 | Q9M0R0 | Q54G94 | O34994 |
| P46946 | P64387 | Q64759 | P30314 | P93007 | P49885 | Q1LMQ4 | Q13283 |
| O15499 | P34470 | P10178 | D0VYS2 | Q8C208 | Q94LW4 | P40971 | P38304 |
| P25846 | Q700D9 | Q9FGJ3 | Q9M1B0 | Q9FYJ2 | P32896 | Q7SQ98 | P25502 |
| Q8RY99 | Q9X1E1 | P07040 | O75446 | Q69GZ5 | Q9BXG8 | Q4P328 | O73718 |
| Q39234 | Q76IQ7 | Q12151 | P28938 | Q93WU9 | Q9YFV8 | P55631 | O31480 |
| O34549 | Q9H171 | A2CEZ5 | P51505 | P20945 | Q765S2 | Q9LVR0 | Q0WNR2 |
| Q5XJ97 | P32797 | P24716 | P16989 | Q66611 | A7U6F1 | Q9CA27 | Q86US8 |
| C6BQP8 | P03670 | C5MCK5 | Q8SWA6 | P31538 | Q6H6Q7 | Q7TP98 | P03052 |
| Q8EQQ3 | Q14814 | Q759V4 | Q86HX9 | O82248 | Q24423 | Q64201 | Q9VK71 |
| P16088 | Q9HGP0 | P35901 | Q6S4P4 | P13121 | Q2G2B1 | Q7UQV4 | Q9UUD1 |
| Q63520 | P79742 | Q9FX53 | Q12888 | Q07956 | P13892 | Q8VWQ4 | Q58884 |
| P55701 | P77730 | P43458 | O43829 | Q9Y3M9 | P45277 | B0W1V2 | O95076 |
| P78962 | Q9FKQ6 | Q5JLB5 | Q9UXF8 | P11115 | Q55BA5 | Q96KC8 | Q25BI3 |
| P43064 | O14108 | P03870 | P94426 | A7TQK0 | Q8SVD3 | P27609 | Q67TP9 |
| P05827 | P08155 | P40333 | P0ACH9 | P26359 | Q54HP1 | P25210 | P28267 |
| Q9X5P2 | A1YF08 | P03355 | O97764 | P41055 | P22336 | P69202 | P41371 |
| O14362 | Q54QY7 | P23393 | Q95PX3 | Q96EK4 | Q17308 | O48652 | A5HBE1 |
| Q9LZV6 | Q58948 | Q57949 | Q8X4Z9 | O59746 | Q9ULJ3 | Q5T0B9 | P18750 |
| P09087 | P15699 | P18848 | Q9SFZ3 | Q9FWS3 | Q8LFB3 | Q99089 | P0AD02 |
| P25047 | O27276 | O73691 | A0R666 | P46908 | Q08605 | B7ZQJ9 | Q8SW51 |
| P14150 | P22813 | P0CF62 | Q2MHH4 | Q2QW53 | Q52110 | Q99MT2 | P04198 |
| Q5E9X1 | A8MTQ0 | Q29480 | P52662 | P03710 | Q6J9S1 | B7GSG2 | Q54MH9 |

---

---

|        |        |        |        |        |        |        |        |
|--------|--------|--------|--------|--------|--------|--------|--------|
| P06153 | Q38740 | Q26603 | Q9R9T9 | O05052 | Q54YG9 | Q2TBI2 | P37245 |
| P52087 | P95003 | Q93WV4 | Q2YV56 | Q9FKP8 | P96686 | P76138 | Q9Y2Y4 |
| Q9H8N7 | Q9BUG6 | Q01593 | Q3U0L2 | Q9GPH3 | Q8GT73 | Q9SIV5 | P47112 |
| Q08CW8 | Q6NQ88 | P68350 | Q6R7C9 | Q7Y0W3 | P10157 | Q9I9K0 | Q87039 |
| Q9C882 | Q5ZKW8 | O64702 | Q02953 | Q8RXS6 | Q26228 | Q8S151 | P22896 |
| Q12175 | Q7ZVR6 | Q9H2A3 | Q8IUM7 | P76086 | P13976 | Q91WC1 | O43502 |
| Q4JYF5 | P40348 | Q03465 | P43472 | Q08143 | P12954 | P75433 | Q9BQ70 |
| Q8NA92 | Q48514 | P45612 | P51721 | Q32SG4 | A0RCV1 | Q9FGD2 | P22645 |
| Q7Z142 | Q5SVQ8 | Q32KV8 | Q07231 | P49777 | Q6W4T3 | P46897 | Q9LQ08 |
| Q9SK74 | P23939 | O94130 | P35638 | O80928 | O59610 | P13002 | O00321 |
| P29176 | Q9ZB11 | P15360 | P15038 | P52926 | P42147 | Q5BAZ5 | Q75IP6 |
| B5DR03 | Q12041 | O74502 | P20428 | O45521 | P87558 | Q9P8G9 | Q97FU2 |
| Q28147 | C3P8Z9 | B0S909 | P22670 | P78022 | P09077 | O05840 | Q864P9 |
| P06990 | Q9SJK7 | O57568 | Q52873 | Q83950 | Q62481 | Q9FL26 | A0M2C1 |
| Q057N0 | O31494 | O34920 | Q96K62 | Q6IV72 | Q8NBB4 | Q148M8 | Q24645 |
| Q5IS79 | Q66GR3 | Q10B98 | P53567 | Q9VWW0 | Q92771 | Q9M2U1 | Q779J8 |
| Q9UKW6 | Q9Y603 | P55317 | P69781 | O33149 | Q02577 | Q8LDF9 | Q28772 |
| A7TJ13 | P10105 | Q76MX4 | Q9XUB2 | O34829 | P28698 | O17573 | Q60641 |
| Q9C1A4 | Q04803 | O32504 | P06838 | Q6MAG9 | D2HNV6 | P66808 | P52686 |
| Q6PV68 | C0SPB6 | P19705 | Q9M1U4 | P36598 | P03010 | O65420 | Q8L3W1 |
| P19544 | Q8GWU1 | Q58038 | Q83KJ8 | O31943 | Q64321 | A1YEQ3 | P0AC51 |
| Q4FZR5 | Q8I1N6 | Q9GQN5 | Q9ASX9 | Q0JD07 | Q6FUG1 | A8A8H1 | Q9Z1T5 |
| Q84K52 | Q9YUS3 | Q10655 | Q03828 | Q9PSY4 | Q6QPM2 | Q9X3Y3 | Q5TGS1 |
| P26586 | P31504 | P0CF88 | P18816 | O05103 | Q89AK2 | O02786 | Q9ZNU2 |
| O17931 | B8DSV1 | O31178 | Q4V7W5 | E9PZZ1 | P31244 | Q0B0Z2 | P49330 |
| Q9AE24 | P34228 | Q5SXM2 | Q9BWW4 | Q49434 | Q9LSD5 | Q96MW7 | P33786 |
| A0QRY5 | P27336 | P23841 | Q5V5E2 | O86228 | O31500 | O31865 | Q9P1Z0 |
| Q8BI67 | Q6NH62 | P23196 | Q22258 | O22901 | Q7XPK1 | Q874J6 | Q9M374 |
| Q6FIN4 | Q9LSL6 | P22373 | Q9LYD9 | Q89AD1 | Q13461 | Q9LRH6 | P42944 |
| Q04832 | Q00423 | Q25514 | P39212 | P42167 | Q9WU40 | Q4UMJ0 | O42837 |
| O49255 | P0A9G2 | P38082 | Q8IMA8 | Q9BVI0 | Q60636 | Q02398 | O67837 |
| Q6CIL8 | P66812 | Q12MQ7 | O74365 | P73145 | Q99335 | Q9VLR5 | Q17RP2 |

---

|        |        |        |        |        |        |        |        |
|--------|--------|--------|--------|--------|--------|--------|--------|
| P54294 | P38078 | P68926 | Q8R890 | O68025 | Q9W352 | P39959 | P42097 |
| Q9R0G7 | Q6ZNH5 | P46106 | P05052 | P01551 | Q5EA15 | Q75K81 | Q2N2K6 |
| O69644 | P37947 | P40059 | Q9P6L6 | P39788 | P40427 | Q8ITI5 | Q07928 |
| Q75WM6 | O49403 | P27610 | Q9HU78 | P96629 | Q8MLV1 | O94160 | Q5AI97 |
| Q707Y7 | Q7F2L3 | Q55C24 | Q08595 | P28958 | Q57SD4 | P06601 | P10862 |
| Q55681 | Q9YCB6 | P17211 | Q01105 | O30919 | Q8FLP9 | P36145 | Q9FMX2 |
| P47980 | P10512 | P51705 | P27079 | B6IPE2 | O53509 | Q58177 | O42648 |
| P21260 | P67854 | Q6P0X2 | Q3J6K8 | P61802 | Q9SSW0 | Q9CAA4 | Q6L5G1 |
| P49453 | Q5IFN2 | P39140 | Q5JET0 | Q6FCX7 | O86820 | Q60GC1 | Q9P0K8 |
| O49741 | P27204 | Q657C0 | P0CY11 | Q9PWD6 | P15314 | Q96JN0 | Q708A1 |
| Q6C6V8 | Q707Y0 | Q9M126 | Q9N4Q7 | P52693 | P09274 | Q8ST83 | P35856 |
| P06839 | Q9CL21 | Q6F598 | Q9UST5 | A6X980 | Q54X41 | Q8EWT6 | P41895 |
| P0ACQ8 | Q8LJT8 | F4I7L1 | P51894 | P15482 | Q73NE4 | Q10528 | Q6Z3U3 |
| P54722 | P45903 | Q9P243 | Q9D0B1 | A9KTE6 | P35319 | Q9W0K7 | P06709 |
| Q9SD61 | P0DJH6 | Q46901 | P31460 | Q9HLK5 | O82132 | O54839 | P06229 |
| Q6VFT5 | Q95JA5 | Q92522 | Q67U94 | Q03372 | Q1KKZ2 | Q58DJ0 | P08638 |
| Q9HG13 | Q6FNR0 | Q07243 | Q5CD17 | Q09565 | P54988 | Q9Z7M0 | Q6F6A2 |
| P79373 | P41410 | P16922 | Q03316 | P43609 | P0ACH3 | P40656 | Q9WZ73 |
| P11257 | P47988 | Q5F410 | Q6E434 | P06921 | P78714 | Q9CG78 | Q7A3C7 |
| Q54YS0 | Q1MTM9 | P64588 | P10754 | Q5EBM4 | A5VHK2 | O13412 | O07465 |
| P95163 | Q94C33 | Q9D6K9 | O32222 | P06966 | O94263 | Q9LQZ2 | P06494 |
| F1Q514 | Q8K3Q3 | P91623 | P40267 | P0A6X3 | A6NHT5 | Q28598 | A5F9F9 |
| A4LBC0 | Q6WRX6 | Q9ZWA6 | Q06455 | Q6NQK2 | Q10902 | P20824 | Q9PB63 |
| P05066 | Q84WJ2 | Q4IJ84 | Q9V029 | P79051 | P52108 | Q7N125 | A2TED3 |
| P81390 | P24536 | Q06184 | P03008 | P14373 | P03123 | B9MN06 | Q64029 |
| Q0DXB1 | Q7EZD5 | P76639 | Q5UR40 | Q96MM3 | Q9GM03 | Q4L4Y3 | Q5JMM1 |
| Q32LD1 | Q9SW80 | Q8GVZ8 | Q9UFW8 | Q9KSW4 | Q54XG7 | O51498 | P61827 |
| P07903 | A7TMJ6 | Q298W7 | P25555 | P09590 | Q14526 | Q91910 | P50209 |
| Q93348 | P53411 | P52685 | Q3U3N0 | P39897 | Q5E9A1 | Q22127 | Q9YDF6 |
| P22995 | Q51786 | Q8NIZ4 | O93748 | P03045 | O14087 | A6R7F0 | O24629 |
| P35712 | P13275 | Q08082 | Q86WV5 | P37376 | P34818 | P28830 | A0QTG3 |
| Q9HM14 | Q9ZV39 | Q58335 | O42953 | Q09602 | P17010 | Q9P0T4 | P05552 |

|        |        |        |        |        |        |        |        |
|--------|--------|--------|--------|--------|--------|--------|--------|
| P46910 | Q9W6D8 | Q9LZM8 | O65036 | A9X4T1 | O32192 | P64315 | Q9S1G2 |
| Q24573 | Q6NLD5 | Q9JMQ1 | Q9C009 | Q9Y5B6 | Q9P0M6 | G5EGD2 | Q5ZI72 |
| Q6IEI0 | P38144 | Q68G74 | P0AE71 | P53035 | P55323 | Q8N7R0 | Q94407 |
| A1L2F3 | P18493 | Q8GZM7 | P17888 | P21867 | P54884 | Q9CA66 | Q1HVG0 |
| Q9LD95 | P52932 | O02799 | Q9SR34 | P09009 | P05846 | B2I4R3 | Q80920 |
| Q9ZX29 | O43543 | Q57748 | Q9XFB0 | Q5L299 | P54992 | P18733 | Q5T7W0 |
| Q9Z103 | A3BH85 | Q8R1H8 | P39842 | A3BUD2 | Q12873 | Q8NI51 | P23792 |
| P21189 | P13320 | Q9C9I2 | P94548 | Q726D5 | Q27403 | Q6DN03 | P95258 |
| Q00839 | Q1KKY1 | P86938 | Q9HDV4 | Q9LW00 | O73592 | A8ADG3 | P0AF30 |
| O45460 | C5DKJ7 | B3EWG9 | Q84LH8 | P74397 | P55922 | O33348 | Q13129 |
| Q5RE34 | O34843 | P23497 | Q70GP4 | Q75LL6 | O76332 | P0AAR2 | Q10621 |
| Q8BDG6 | D9J034 | O93257 | A1SDH7 | P30864 | Q9USU7 | P46372 | A7SBN6 |
| Q9UEG4 | Q6ZN18 | Q47VK9 | B7ZS37 | Q8L4E7 | Q338N2 | Q3L8U1 | P49956 |
| P87393 | Q97MB3 | Q00400 | Q8LBQ7 | Q8BHL6 | A7ZIA5 | P35547 | P02280 |
| Q23405 | Q9P7P2 | Q98SH9 | Q0VBZ5 | Q27355 | Q8LA53 | P16400 | A7HAB8 |
| Q54DA1 | O02279 | P28947 | O57685 | P76611 | Q4QN02 | Q9LUM4 | P0CAP3 |
| A5PJU7 | P15593 | P94370 | B9DI20 | P38699 | Q9VH20 | P28815 | Q9YB01 |
| P79769 | P22161 | O81788 | P0ACI5 | Q9WYG1 | Q09922 | O07570 | O32067 |
| O95409 | O15015 | B4JQ42 | A2CG63 | Q8GUC3 | O60158 | Q9LUZ4 | Q7YU81 |
| P38877 | Q8LK56 | B1ZN03 | Q96PT4 | Q9LW49 | Q8NFZ0 | Q05192 | Q9N658 |
| Q3SZB8 | P34474 | Q9F8R8 | P09020 | Q93WJ9 | Q95QD7 | Q9SNC0 | Q9UMN6 |
| Q9ZLL4 | P0A3R9 | Q9GTD4 | P41995 | O18381 | Q05749 | Q8WN22 | P22605 |
| Q84WP3 | P89479 | Q13950 | P05709 | P37554 | O74252 | Q5M948 | Q8MIC2 |
| P34184 | P34739 | Q196Z2 | Q6X7K1 | Q05335 | Q8TK90 | Q10096 | P0A9V7 |
| P40950 | Q6FRL4 | Q6AZW8 | P0ACK4 | Q84JT7 | Q5ZM39 | Q24206 | Q657B3 |
| Q9NRG0 | Q09728 | Q801F8 | P28040 | O77051 | Q9SVQ0 | P32028 | Q8U526 |
| Q9FN69 | Q8TFF3 | Q10007 | A2YN17 | Q1KKV1 | Q07053 | P0ACL7 | P13658 |
| P38564 | Q73MQ8 | P38830 | Q9XUK7 | O34777 | O24463 | P12540 | Q9P326 |
| P18516 | Q9STF1 | P19474 | B9MRB2 | P06701 | O73790 | Q6AYD2 | Q16594 |
| Q63505 | O34204 | P26651 | P04530 | Q6X7J9 | Q056Q2 | P0A654 | P40574 |
| P31453 | O32255 | Q9Y2L8 | Q8N1G0 | Q9AT76 | Q0WNR6 | P14353 | Q02479 |
| P09085 | Q924A2 | P10180 | Q32LE6 | Q19196 | Q62814 | Q94ID6 | Q10134 |

---

|        |        |        |        |        |        |        |        |
|--------|--------|--------|--------|--------|--------|--------|--------|
| Q9Z726 | P47806 | Q12180 | Q14774 | P28468 | P18867 | Q9Y2K7 | Q9V5M6 |
| O42954 | Q8EQ23 | A7NPT5 | Q3MHN7 | Q9BJK5 | Q9NJB5 | O83046 | Q58NQ5 |
| Q8BII1 | Q3MCB5 | Q8H2D0 | Q5JMF3 | C5CFS3 | Q62232 | Q1RML4 | Q8WNV1 |
| P72191 | Q9D8P7 | P16472 | Q9TX44 | P03632 | Q9FFK0 | Q8TWM7 | P44680 |
| Q10144 | Q9UTN0 | O34643 | Q96NC0 | Q3U381 | Q40170 | P41739 | P39404 |
| P55201 | P0C6J7 | Q9RC52 | Q7SDY3 | Q8JI10 | Q4PFV5 | Q9FNY0 | Q3E703 |
| Q99581 | Q72TG0 | Q8NBF1 | P24488 | P20270 | Q67UX6 | P71229 | B0X0K1 |
| O44952 | O42709 | P54794 | Q9SM27 | P29503 | Q88FX7 | Q01610 | Q53PH2 |
| P54277 | P74839 | P29558 | P24042 | P35398 | Q8EWC5 | B8H172 | A2YGR5 |
| P36011 | Q02457 | Q01664 | Q9KRB2 | Q9ZIB7 | P03695 | Q8W0F1 | Q9XIK5 |
| Q8TIN0 | O13658 | Q796Q6 | P39592 | P52739 | Q8TF20 | Q9Z3R4 | Q8L9Y3 |
| Q9LNJ5 | O14981 | Q9IG42 | Q8QGQ6 | Q9CWW7 | Q9Z8M9 | Q9Y767 | Q27368 |
| Q9LTC5 | O42861 | O86810 | Q5NAN5 | P14064 | P17488 | Q9XH38 | P68463 |
| B2CW77 | P42584 | Q24849 | P13469 | P81394 | O95644 | Q89WI8 | O16810 |
| A2ZMR9 | P25425 | P80001 | Q9HBD1 | Q67591 | Q9RFJ6 | A3PCR4 | P52286 |
| Q2R3Y1 | O76808 | A6H907 | Q06339 | P34534 | P25980 | P27426 | Q93WY4 |
| Q54UG3 | Q9ZR14 | O31443 | O31626 | P96725 | P52747 | Q96H86 | Q5A4F3 |
| Q9LYP5 | Q700E3 | P41726 | P06946 | Q42498 | P0A9F5 | C5CH91 | O93746 |
| P13055 | P11308 | O55208 | P33244 | P37582 | Q04996 | P41934 | Q5ZM33 |
| P28990 | P52605 | P96653 | Q62724 | P32333 | Q9SPG2 | O94916 | P28348 |
| Q55BR6 | Q84513 | P17208 | Q5B8L0 | Q18919 | P06847 | P50512 | B5YKF0 |
| P71049 | Q9S758 | P46676 | P32086 | Q24318 | Q5UQE6 | P05048 | Q9MA75 |
| Q9C5T4 | Q6A8L0 | Q04296 | P52696 | P39356 | P42105 | O95125 | Q9ULD5 |
| Q8RYD6 | P30338 | Q9LTS4 | Q9C7S0 | Q9CWL2 | Q9ARI6 | P0ACN9 | Q5Z3Z8 |
| O00874 | P0C6Z0 | Q6C764 | Q9HUW0 | P44780 | A4FUF0 | Q41558 | Q22811 |
| Q45881 | Q9DGT6 | Q9JJZ6 | Q32MZ4 | I0IUP4 | Q5A1A0 | Q9LXV2 | Q08D88 |
| O15226 | Q86AD6 | O41056 | Q14863 | P68588 | P03040 | P18629 | Q9ZLC8 |
| Q90415 | Q9W734 | Q01JD1 | Q9C5P0 | P38114 | Q5XFQ6 | O61660 | Q7TMI3 |
| Q06861 | O22921 | Q2QMT6 | Q7XKC4 | O94490 | P39529 | P37499 | O75362 |
| Q6DD87 | Q9Z0E3 | Q9HEV5 | Q9ZPW3 | Q54WN7 | P32504 | P41830 | Q29CW0 |
| P59966 | P03261 | P49882 | Q9S7C9 | O60129 | Q9LW31 | Q9Z7G4 | Q557C9 |
| Q93356 | Q9US25 | O94704 | Q13886 | Q38796 | Q91573 | Q54PT9 | B0G0Y5 |

---

|        |        |        |        |        |        |        |        |
|--------|--------|--------|--------|--------|--------|--------|--------|
| Q9SY59 | P78426 | P43684 | A5UMB4 | P23009 | O69055 | Q08904 | P36279 |
| Q58559 | Q9NR83 | E1X022 | C4VB43 | P32591 | Q19691 | Q74MZ3 | Q12WQ0 |
| A6NJT0 | P03110 | Q8GWF1 | Q1G3Z6 | P55411 | O31472 | P35995 | Q6AHZ1 |
| Q9NRM2 | Q96IR2 | Q6GLW8 | Q2EGB9 | Q84RD0 | Q5BUB4 | P25545 | O23463 |
| Q9UI36 | B1AHY7 | Q7Z5Q5 | Q05958 | B8PBQ6 | P26487 | P54574 | Q46259 |
| Q869W0 | Q22910 | Q9W539 | P39343 | Q9Y5W3 | A4WER5 | Q3YC04 | A9A1T2 |
| Q38851 | Q6P4R8 | Q8TAU0 | Q54P62 | Q973F5 | Q7Z3K3 | O04681 | P38086 |
| P03627 | P20434 | Q9Y2V3 | Q6PGB8 | P37956 | P09547 | Q9EPZ6 | A2BLW2 |
| Q9YE67 | P52906 | P03108 | Q93WT0 | Q57089 | Q9ZD50 | O78417 | O34949 |
| Q6P3Y5 | O14978 | Q6ZT77 | Q6KAQ7 |        |        |        |        |

---

### 1332 Non-binding proteins

---

|        |        |        |        |        |        |        |        |
|--------|--------|--------|--------|--------|--------|--------|--------|
| Q4FUR9 | P16154 | Q55DP9 | Q24247 | Q69ZZ9 | Q7NFT5 | Q1RKC5 | Q54YF2 |
| F1QGZ6 | O14492 | P06652 | Q6DR03 | Q9Y871 | P55679 | Q07729 | P15273 |
| Q058P4 | O67776 | P81922 | P47049 | Q8VCH5 | Q38E56 | Q680C0 | B3QQR6 |
| Q6CXH7 | O53526 | P44520 | Q59570 | O43067 | Q55E31 | Q09383 | P71631 |
| P0A8Y2 | Q9WUZ7 | Q52828 | Q08974 | Q9PQY5 | A7RZS0 | B0S115 | P19815 |
| Q9UW00 | Q54V32 | P86223 | O15453 | Q2V4I2 | O00626 | P85064 | O30315 |
| D9U2B0 | P12256 | O31784 | Q559A2 | Q5RJH6 | Q9UI26 | P32383 | Q4P683 |
| P52384 | Q874L7 | P25147 | P25306 | P42359 | Q3MIP1 | Q8TX79 | B0G140 |
| Q8C5P5 | Q9CAR3 | Q0WU02 | P36630 | O59635 | Q9FEB5 | Q06282 | Q39980 |
| Q6NPT8 | Q1IHD2 | Q89FG4 | O43125 | Q07560 | O74490 | Q9Z869 | Q8N7B6 |
| P0C0I7 | P59987 | Q9D3J8 | P40080 | Q8IXL7 | P0CZ10 | Q9UUN5 | Q57889 |
| Q5UQZ2 | Q54B20 | Q05296 | Q9GQ63 | O67257 | Q9Y5J6 | Q9XGX9 | P0AD11 |
| Q9USW6 | P39495 | Q9Z8J7 | Q6GZU9 | Q8IW35 | A1A4S6 | Q9V6K3 | P42593 |
| Q26643 | Q6CIF3 | Q11124 | Q04080 | P09296 | O74867 | Q6CPK7 | Q59UG3 |
| P50168 | P24651 | Q57857 | Q9V576 | Q9FGL0 | Q61190 | Q04212 | P34366 |
| O14242 | Q8N614 | P54661 | A5F660 | Q56902 | Q5UNY7 | P14503 | O15537 |
| Q5SNQ9 | P15633 | Q68G75 | Q08815 | Q9Y442 | Q84TF4 | P34645 | P10018 |
| Q2YAV2 | O66410 | P53225 | P17983 | P16805 | P0C8P8 | P0AAE1 | Q10212 |
| Q9IBG7 | O88492 | Q00143 | P0CD62 | Q07895 | Q7NFT6 | Q6DIV5 | Q2NL17 |
| Q5L586 | Q6CRV9 | Q76PC4 | Q8KCC4 | Q83HJ9 | P30651 | Q9LM63 | Q08317 |

---

---

|         |        |        |        |        |        |        |        |
|---------|--------|--------|--------|--------|--------|--------|--------|
| Q619N4  | Q9I1M2 | Q9UZC1 | P46086 | Q8D2U9 | Q6PC40 | Q64281 | Q9WXE6 |
| Q65NX1  | P11435 | Q8VPF3 | Q64537 | Q32L08 | Q17R16 | Q5GC94 | Q8R3J5 |
| Q9X016  | Q8WMH2 | P0C6Z1 | O28254 | P0AF00 | P23208 | Q54XC4 | Q9BM90 |
| Q60AU6  | Q58680 | P93290 | Q2KIQ8 | Q9XJS6 | O28642 | C0H3Z7 | A4QI94 |
| P53616  | Q8U1R0 | Q54XA2 | P39059 | P46023 | Q9LY32 | Q3TCV3 | O73683 |
| Q04322  | Q9Z2C4 | Q8PXD4 | F4J117 | Q5UP41 | Q9M190 | Q54L83 | P12611 |
| P37197  | Q4FUR4 | Q5VQY3 | Q08467 | O95727 | Q8TYR8 | O05156 | Q9UHP6 |
| O83811  | Q9RND2 | O82368 | Q90665 | P24665 | P50524 | Q7X9V3 | Q47AR4 |
| O64243  | P42719 | Q8JFZ2 | Q54I54 | P44193 | Q3KPS4 | P64741 | Q03605 |
| O31790  | Q9AST6 | Q00189 | P56544 | O26618 | D3YUG0 | P44465 | Q8LFL4 |
| P80565  | Q3E7A5 | P41820 | Q3JV52 | Q7TNJ2 | Q3UFQ8 | P41885 | Q0WVL7 |
| Q9VPW1  | Q6NUN7 | Q22949 | P85500 | Q08CL8 | Q6NUJ5 | Q63135 | P91276 |
| Q60401  | P80354 | Q9WZS2 | Q9QZK7 | O13340 | A0JPP4 | P35826 | A4QDF8 |
| P49583  | P25358 | A8MGE1 | Q9YAA0 | O06652 | Q8N144 | P25143 | Q9UUH2 |
| P73555  | P09126 | O47558 | P91851 | Q2TAM9 | P86729 | E5KIB9 | Q8UC57 |
| Q6GLM5  | P80519 | Q6VAK4 | Q6ZVL8 | Q5UP07 | Q55FM5 | A8MXB1 | P81311 |
| O32066  | O18495 | P95262 | O66477 | O07899 | O31723 | O14157 | Q0IQN5 |
| Q15032  | P32454 | Q54RE1 | Q5U5R9 | Q6C315 | P10505 | Q6FJW2 | O44783 |
| Q8MY Y6 | P90970 | P50466 | O52908 | Q9H9V9 | Q10138 | F5HFA5 | Q9W2B1 |
| Q9CF93  | O31710 | Q9K499 | Q2YJ76 | Q0VCR6 | P77515 | P64829 | Q86282 |
| P35182  | D4GQ17 | P15328 | Q54JC2 | A0SIF1 | P53224 | Q7WR85 | Q6PBD1 |
| Q0IIX4  | Q54QQ6 | F5HGQ8 | Q5R7Q6 | Q97VM6 | Q9H8Q6 | P00217 | Q83101 |
| P86247  | Q32L75 | P0DJ93 | P0C5M2 | P54494 | Q9I3N4 | P00782 | P50725 |
| Q92576  | F4I8B9 | Q8BPQ7 | Q7KT91 | Q02875 | A0JMD4 | Q7SX85 | C0LGH8 |
| Q13QI0  | P63186 | P03975 | Q7YQK3 | Q9C5J4 | Q5EA84 | O34474 | O76878 |
| Q0V7M1  | Q18262 | Q54I86 | Q92348 | Q54MY4 | Q5BK32 | O94283 | Q9ZVJ6 |
| P19802  | Q3KPI0 | Q09369 | Q96G27 | Q2KIB3 | Q06171 | Q5SPV6 | Q50834 |
| Q1ECF1  | Q5UP27 | Q5FF65 | Q9DA64 | P21063 | P0AAR3 | Q1AYN1 | O59669 |
| O74416  | P81730 | Q00305 | P40147 | P48336 | Q2V3Q8 | Q8WVIO | Q57800 |
| Q55DA6  | A6WYX0 | Q68DN1 | Q6TS43 | Q56307 | Q9Z138 | Q61072 | Q47VK1 |
| O94830  | Q14CZ7 | P17571 | Q6K762 | Q79FZ4 | Q51693 | Q9FZD4 | Q8X6R3 |
| Q3SWT5  | Q0IIC2 | Q54NU5 | Q54J33 | P15443 | P32804 | P35538 | P25344 |

---

---

|        |        |        |        |        |        |        |        |
|--------|--------|--------|--------|--------|--------|--------|--------|
| Q55DV8 | Q6PK18 | P55190 | Q54LT8 | Q8TPU8 | Q9LW55 | Q9I106 | P43993 |
| P0A3U6 | Q9ZN54 | P20633 | Q5R0C0 | P15262 | O62771 | Q5I148 | Q9SRD8 |
| Q1ZXB9 | Q17QE0 | P61471 | Q8R404 | P21324 | P44082 | P19731 | P06424 |
| P0AAQ1 | P07503 | P77368 | A7Z4X7 | Q968X7 | Q2QAV0 | Q7ZXF1 | A0R5G1 |
| Q9LUJ2 | Q03042 | Q9XWN6 | Q5H7C3 | B3DPJ1 | Q8R5M4 | Q9NWM0 | Q6DCC6 |
| Q8NSL3 | Q7Z1V1 | A6QLD5 | Q5UQR5 | A2RAY7 | Q9KJE8 | O34929 | O16785 |
| P67098 | A7TP86 | P25619 | Q12182 | A9M186 | O62246 | Q54IV8 | P64785 |
| P20334 | P17418 | Q196Z8 | Q7XSZ4 | P32024 | P44187 | Q3V4V8 | P0AB36 |
| P44203 | Q9R168 | P40083 | B5XG43 | Q9T068 | Q9C0W4 | P49329 | O32132 |
| Q5MJP5 | P0A243 | P0CAY5 | B8GYW7 | Q86YZ3 | P45103 | Q2XVR7 | Q86286 |
| Q75B79 | P0C550 | P45182 | Q54KW6 | P0CB21 | D9SM34 | Q7XJM2 | Q84NC9 |
| Q75AS3 | P09870 | Q9WZ43 | Q55587 | P34390 | Q8MIT6 | Q84WW1 | Q9BRQ0 |
| Q55368 | A1SVX3 | P49071 | P38066 | Q5UQP2 | Q05957 | O28550 | Q9UIY3 |
| Q9IAX2 | Q10322 | B3LM44 | Q58766 | Q9X0Y7 | O67171 | P45023 | Q9HPL2 |
| P28893 | P21760 | P08930 | O35013 | D1FNK4 | Q6A5A3 | P18006 | P00136 |
| Q9T1T2 | P30345 | C0H3W7 | Q5PH63 | P55527 | P19048 | P0C2W8 | P81726 |
| Q2WGJ9 | P75296 | Q96S38 | B8MR69 | Q09815 | Q9Y5S1 | A0T0H4 | Q7TMS5 |
| Q20035 | Q10338 | Q9YGC1 | Q567G6 | Q2FDU6 | P37536 | Q18LD4 | P21890 |
| Q5UR07 | Q07510 | Q9YBL2 | C5DKA0 | P08452 | Q12476 | Q942P9 | Q9GZN4 |
| Q9K9E6 | P79400 | P77414 | P42910 | Q8LAD0 | Q96MU5 | P37663 | P19273 |
| Q86I14 | P13249 | Q2NL13 | Q914J6 | Q8AXS4 | P86837 | Q9BXW4 | Q51795 |
| P0C5E1 | Q914K4 | Q12225 | Q55842 | P59646 | O05755 | H3BU77 | C0H400 |
| P25184 | P43790 | Q9C093 | Q5B993 | Q1LXZ7 | Q09822 | Q13099 | Q54MV6 |
| A4Q9F3 | Q2M243 | P34256 | Q9US48 | Q96S66 | P19517 | P58368 | Q9NQZ2 |
| Q9LQQ1 | Q9CIT4 | Q9LT79 | Q8SQZ4 | Q9NP31 | P48510 | P96853 | E9AIE8 |
| P42071 | Q7VHY7 | P54004 | Q833Y3 | Q07275 | Q3JEM4 | O07533 | Q9SP35 |
| O24915 | Q9T4W8 | P63753 | Q9P7K1 | Q6GMV1 | O73707 | Q57457 | O67076 |
| P75594 | P05462 | P92563 | O13548 | Q2FK96 | P55759 | Q58518 | P25965 |
| P31279 | A6MWS7 | P15156 | A1VZY1 | Q8YA32 | A3EXG6 | Q09147 | O13776 |
| Q5TU55 | Q496Y0 | P03322 | Q9W5A5 | Q8SR40 | Q9V2X0 | Q8IWA6 | Q98ST5 |
| O23491 | Q96A99 | Q0I442 | Q9X0H9 | Q6DFW0 | P15698 | Q9NX36 | P0C8Q0 |
| O34478 | Q9UUN9 | P14491 | Q6ZUC2 | Q9REB3 | P54513 | Q18LE4 | Q830R7 |

---

|        |        |        |        |        |        |        |        |
|--------|--------|--------|--------|--------|--------|--------|--------|
| P45067 | P89036 | Q9ZD54 | P54607 | P77174 | Q600K7 | B3PY58 | P58073 |
| Q9HKK0 | Q56206 | P33968 | P74897 | Q9ZB81 | P50658 | P41424 | P48928 |
| P55794 | P35722 | Q8WSV0 | P39088 | Q9XUB9 | Q9M4E3 | Q7M732 | Q8JGS1 |
| Q8CHD8 | Q7DDB6 | Q9SWG3 | Q0AC83 | P23469 | Q9QZS3 | A2VD23 | Q8RWD6 |
| Q9SZT9 | Q1LZI1 | P28817 | Q9LVS3 | Q936X3 | Q6FL09 | Q70D51 | Q4PI64 |
| P31391 | P22623 | Q8GXI9 | Q9P7S8 | Q9BXJ3 | P87236 | P28945 | Q8VI88 |
| P11900 | Q9QJ13 | Q9N598 | Q7NB93 | P43685 | Q6MPS6 | Q1PEU9 | P05044 |
| A4D0T7 | Q54NW0 | Q54DU9 | Q54T60 | Q54JV8 | Q3SZ13 | P71038 | Q8SW19 |
| O59764 | O28167 | P0C2D7 | Q54L43 | P10307 | P39426 | P39709 | Q87CA2 |
| P53705 | Q86SQ0 | Q9NTJ4 | P32917 | O64584 | P52519 | Q6GVH4 | P32382 |
| Q8INB9 | Q13651 | B3LJR0 | E5EZX0 | P0AEQ0 | P21978 | Q9PJN1 | Q8WWN9 |
| Q86XS8 | C4Z0F4 | Q10151 | Q5UPA5 | P76015 | P53731 | D4GPW1 | O83848 |
| P0A9I2 | Q58283 | Q0P5A4 | Q31696 | Q8N1D0 | Q95NH6 | Q1CAP8 | Q8GXN6 |
| Q495Y7 | Q9K794 | P02516 | Q9M0Z6 | Q12157 | P42298 | P13432 | Q58166 |
| P0A3P0 | O31877 | P55885 | P73634 | A4ZUD4 | Q56K04 | P68628 | D2Y3T7 |
| P21303 | Q8ERW3 | Q85FG7 | P0CM75 | O08684 | Q9V3R1 | Q9FZ57 | A0BKG2 |
| Q7VMF9 | Q86X29 | Q9FND8 | Q86VW1 | P97531 | O80436 | Q09623 | Q6Z4A7 |
| Q02891 | Q96329 | Q57493 | Q5M9Q1 | O12000 | O13375 | P06579 | Q9D9W0 |
| O66891 | O64471 | Q5E9Y2 | Q75CF5 | O15194 | Q5UQS3 | Q05019 | P44570 |
| Q9USP6 | Q8C1T8 | P0ADJ1 | P53949 | Q11118 | O83451 | Q1X6Y5 | P04459 |
| P25601 | A8QW39 | P96647 | P23935 | O30138 | Q63751 | P00168 | Q5RAW7 |
| P49801 | Q86H87 | Q9VA27 | Q5JF37 | A0MSJ1 | P43597 | P19061 | O81643 |
| Q6GLQ4 | Q54MH0 | C4A0D9 | P76393 | Q58458 | Q8TEU8 | P33941 | A7U6F0 |
| Q5UNU5 | O69729 | Q4P5F5 | P38349 | A4FUZ6 | Q15RS7 | C5E2E7 | Q66HT8 |
| Q76NW7 | Q9SYB1 | Q6DG60 | P58030 | Q8CF25 | Q197E3 | Q54Z85 | Q96WS1 |
| P54549 | P46016 | Q9BEG9 | P31925 | Q5XIX8 | Q9FFR6 | Q91ZE9 | Q9KWH3 |
| O22891 | Q0A8V6 | Q3J164 | Q57659 | P0A1L2 | Q58199 | Q5UP96 | P09031 |
| P41908 | P64457 | G2TRR6 | A4IFH6 | Q8REI1 | Q5HJ91 | P35992 | Q6R2V6 |
| Q9SHI1 | P32509 | Q13164 | Q8BH55 | P94017 | Q9FI80 | Q21624 | P38482 |
| P29683 | Q8R8R6 | P55570 | B3DZT0 | Q70Z44 | Q1DKE6 | A7ZPJ9 | Q9UT27 |
| Q8T293 | Q4EW11 | O10278 | C5FF22 | Q8VII0 | Q44773 | P0AFR0 | P09038 |
| Q4R8C7 | Q92361 | Q9VMW8 | A8MUP2 | Q4WNB5 | Q9HFF2 | Q60369 | Q6MSE7 |

---

|        |        |        |        |        |        |        |        |
|--------|--------|--------|--------|--------|--------|--------|--------|
| A5DE24 | Q9WWW4 | A5PN52 | Q02586 | O33603 | P38505 | Q9Z0C9 | Q8YQC8 |
| Q8SUM8 | P12352 | P29907 | A2VE22 | P81712 | P28617 | P25947 | Q97J00 |
| Q9Y6R4 | E7F9T0 | Q09573 | P54232 | Q70EL2 | Q8QHJ9 | A8XSW2 | Q61ZW5 |
| Q08299 | P52716 | Q8N4S0 | C1JJY3 | Q9PR97 | P34800 | Q86A68 | Q99KN1 |
| P82982 | P04519 | Q2NF85 | Q9BZ68 | Q5V061 | Q8N0X4 | Q05032 | Q96LJ7 |
| Q9CM13 | Q54NF1 | Q54367 | P08353 | P31808 | Q9CPD1 | P0A5Q5 | Q04VC9 |
| Q18KN9 | Q60453 | Q58330 | Q5UQP6 | Q9SN51 | Q86WC6 | P34289 | P15896 |
| P87268 | O76198 | P43939 | Q54UW8 | P30659 | Q6R7K7 | O29177 | O83340 |
| Q8NQ93 | P86862 | P23678 | Q9ULD4 | Q54TA5 | Q6FIU0 | P54371 | P36148 |
| Q6NUQ4 | Q58313 | Q6UDF9 | P04023 | P0AEC9 | Q2FUW3 | Q03900 | Q196V4 |
| Q9VNB3 | Q9QJ46 | Q6JBY9 | O74916 | P09789 | P47558 | Q9ZE28 | Q0DGG8 |
| Q39108 | P10297 | Q616J1 | P37694 | Q73G32 | Q8XBJ4 | P48246 | Q6I5B2 |
| Q58382 | Q87QY9 | P40866 | P30170 | Q0WTI8 | B8D8G1 | P76510 | P53162 |
| Q74N24 | Q9I644 | Q5UR80 | P53105 | P19307 | Q8NMM9 | Q4UV74 | O32278 |
| E5KIB6 | C5PEI9 | Q2PC93 | Q22366 | P36168 | P28876 | Q71F54 | Q4W9B8 |
| Q9R0E1 | Q9LSB8 | Q9KIG4 | H2KZB2 | Q9LHI7 | Q9P903 | P21840 | Q6LYC4 |
| Q8G5R2 | A5PJI7 | P53124 | Q9SMU4 | P55086 | O07737 | Q7XT08 | Q54CS7 |
| Q9LQW4 | P54857 | Q06703 | O34574 | P29370 | P26093 | P51861 | Q555E8 |
| P0AFY4 | Q9FNH4 | P47352 | O34452 | Q1DB04 | Q54FK2 | P0A0Q8 | P09821 |
| Q9BVM4 | Q58727 | B3RHU5 | Q0D2G3 | P0C8E7 | P46521 | D9U2A3 | A9JR56 |
| P80427 | P44021 | Q9PLN5 | Q9JLC8 | A6R8Q8 | O94812 | O84462 | Q4A696 |
| Q965Q8 | O74990 | Q75A03 | Q92275 | P22317 | Q6AGI5 | Q49XT4 | Q54C18 |
| P31845 | Q08271 | Q94C25 | O87875 | B1Q006 | P13258 | Q96WW2 | P38180 |
| Q5UP42 | O00398 | Q9LRB7 | Q9N126 | Q9RL35 | B0S8I0 | Q8KA73 | Q88BY5 |
| A7AWN0 | Q9C5D0 | P39379 | Q62147 | Q59295 | Q70LD0 | Q06536 | B3LPE4 |
| P02588 | P50824 | P25956 | P49781 | P54587 | O54885 | Q8QL49 | Q09953 |
| P42634 | Q58393 | Q23688 | Q07946 | Q54BW4 | P34244 | Q7TT23 | Q54BN8 |
| Q9SX85 | Q95QC4 | P38213 | Q8WVZ9 | Q0WQW5 | P43865 | Q8MML5 | Q2UP89 |
| Q8ZWQ7 | P40260 | O06151 | Q6BW41 | P55496 | C3MZF0 | O42858 | B5X216 |
| F2M971 | B0SCK5 | Q5UPK1 | Q97PN8 | Q21DK2 | P75042 | Q5M0S7 | Q9D6Y1 |
| P76044 | Q00017 | Q1DNB0 | Q54BC2 | O31960 | O10354 | P22468 | Q3K4T4 |
| Q12036 | Q196X8 | Q94519 | P20094 | Q5UPH6 | P37097 | P0AD55 | P15611 |

---

---

|        |        |        |        |        |        |        |        |
|--------|--------|--------|--------|--------|--------|--------|--------|
| P81164 | Q3E747 | P0DKM1 | Q4UJJ2 | Q44585 | Q86AC8 | Q8R4P9 | Q2M389 |
| Q7XA40 | B9DFX7 | P21520 | Q54BH5 | Q9P896 | Q9Y1J3 | Q9NSC7 | P0C6E7 |
| Q09825 | P0AE17 | P43047 | Q9XYF4 | O06557 | P72835 | P48635 | P74193 |
| P29285 | Q54HW8 | Q8BGT0 | Q8TC99 | A9M3N5 | Q54UT2 | Q5V6B8 | Q86IZ4 |
| P77599 | Q09921 | Q197D4 | A7HJZ9 | Q96CD2 | Q97CR4 | P51547 | P34282 |
| A1AU70 | P93300 | P0CAN9 | Q65178 | A8FHW9 | G2TRM0 | O28717 | Q06094 |
| P14613 | P0A9V0 | Q55E72 | P38939 | Q9NSY1 | B4QIS3 | Q5H071 | Q10003 |
| P50872 | Q8NE28 | Q8K0L0 | Q8FDI4 | Q10633 | Q9RC53 | Q9X2V9 | Q3E911 |
| Q2FFY7 | Q5VXM1 | P73456 | Q944H5 | P78423 | Q9SA41 | Q5JXM2 | P23516 |
| Q76PC3 | Q54VI5 | Q8RXD3 | Q8STJ2 | Q9NPL8 | P94560 | Q9HLU2 | Q04566 |
| P40683 | Q8C708 | P25614 | O08249 | Q12064 | Q5UPP9 | Q035X6 | O52749 |
| P04533 | P37227 | Q9ULZ0 | O31909 | H2A0P1 | Q3V4W9 | Q6C4Y4 | Q07383 |
| Q3E7A3 | Q9T0H2 | Q04QD0 | O61363 | A0JNW5 | O74755 | Q0E3C8 | Q8TF61 |
| Q05682 | P17119 | P13463 | Q14DL3 | Q9H2C0 | Q28198 | P51871 | O48956 |
| A2CEH0 | Q969A8 | Q58275 | Q99J72 | P50837 | Q9C6J3 | O68873 | Q46840 |
| Q32L59 | Q9P7G4 | Q652K6 | P0A5Q7 | Q5N8G1 | Q9FL54 | Q8V7G4 | Q9BXT2 |
| P86176 | Q60292 | Q9LJQ5 | Q00045 | Q5UPX2 | A0RTV6 | P24372 | P43984 |
| Q65389 | Q6B8Q1 | P64905 | O34880 | P01087 | Q08498 | Q02598 | P18033 |
| P20550 | P33957 | P64477 | O94682 |        |        |        |        |

---
